# Supplementary material for: Variations in the Structure and Evolution of Rice WRKY Genes in Indica and Japonica Genotypes and their Co-expression Network in Mediating Disease Resistance
Source: PubMed Central journal article supplement — Evol Bioinform Online. 2019 Jun 15;15:1176934319857720. doi: 10.1177/1176934319857720 (PMC6572876; doi:10.1177/1176934319857720), 2019-06-15

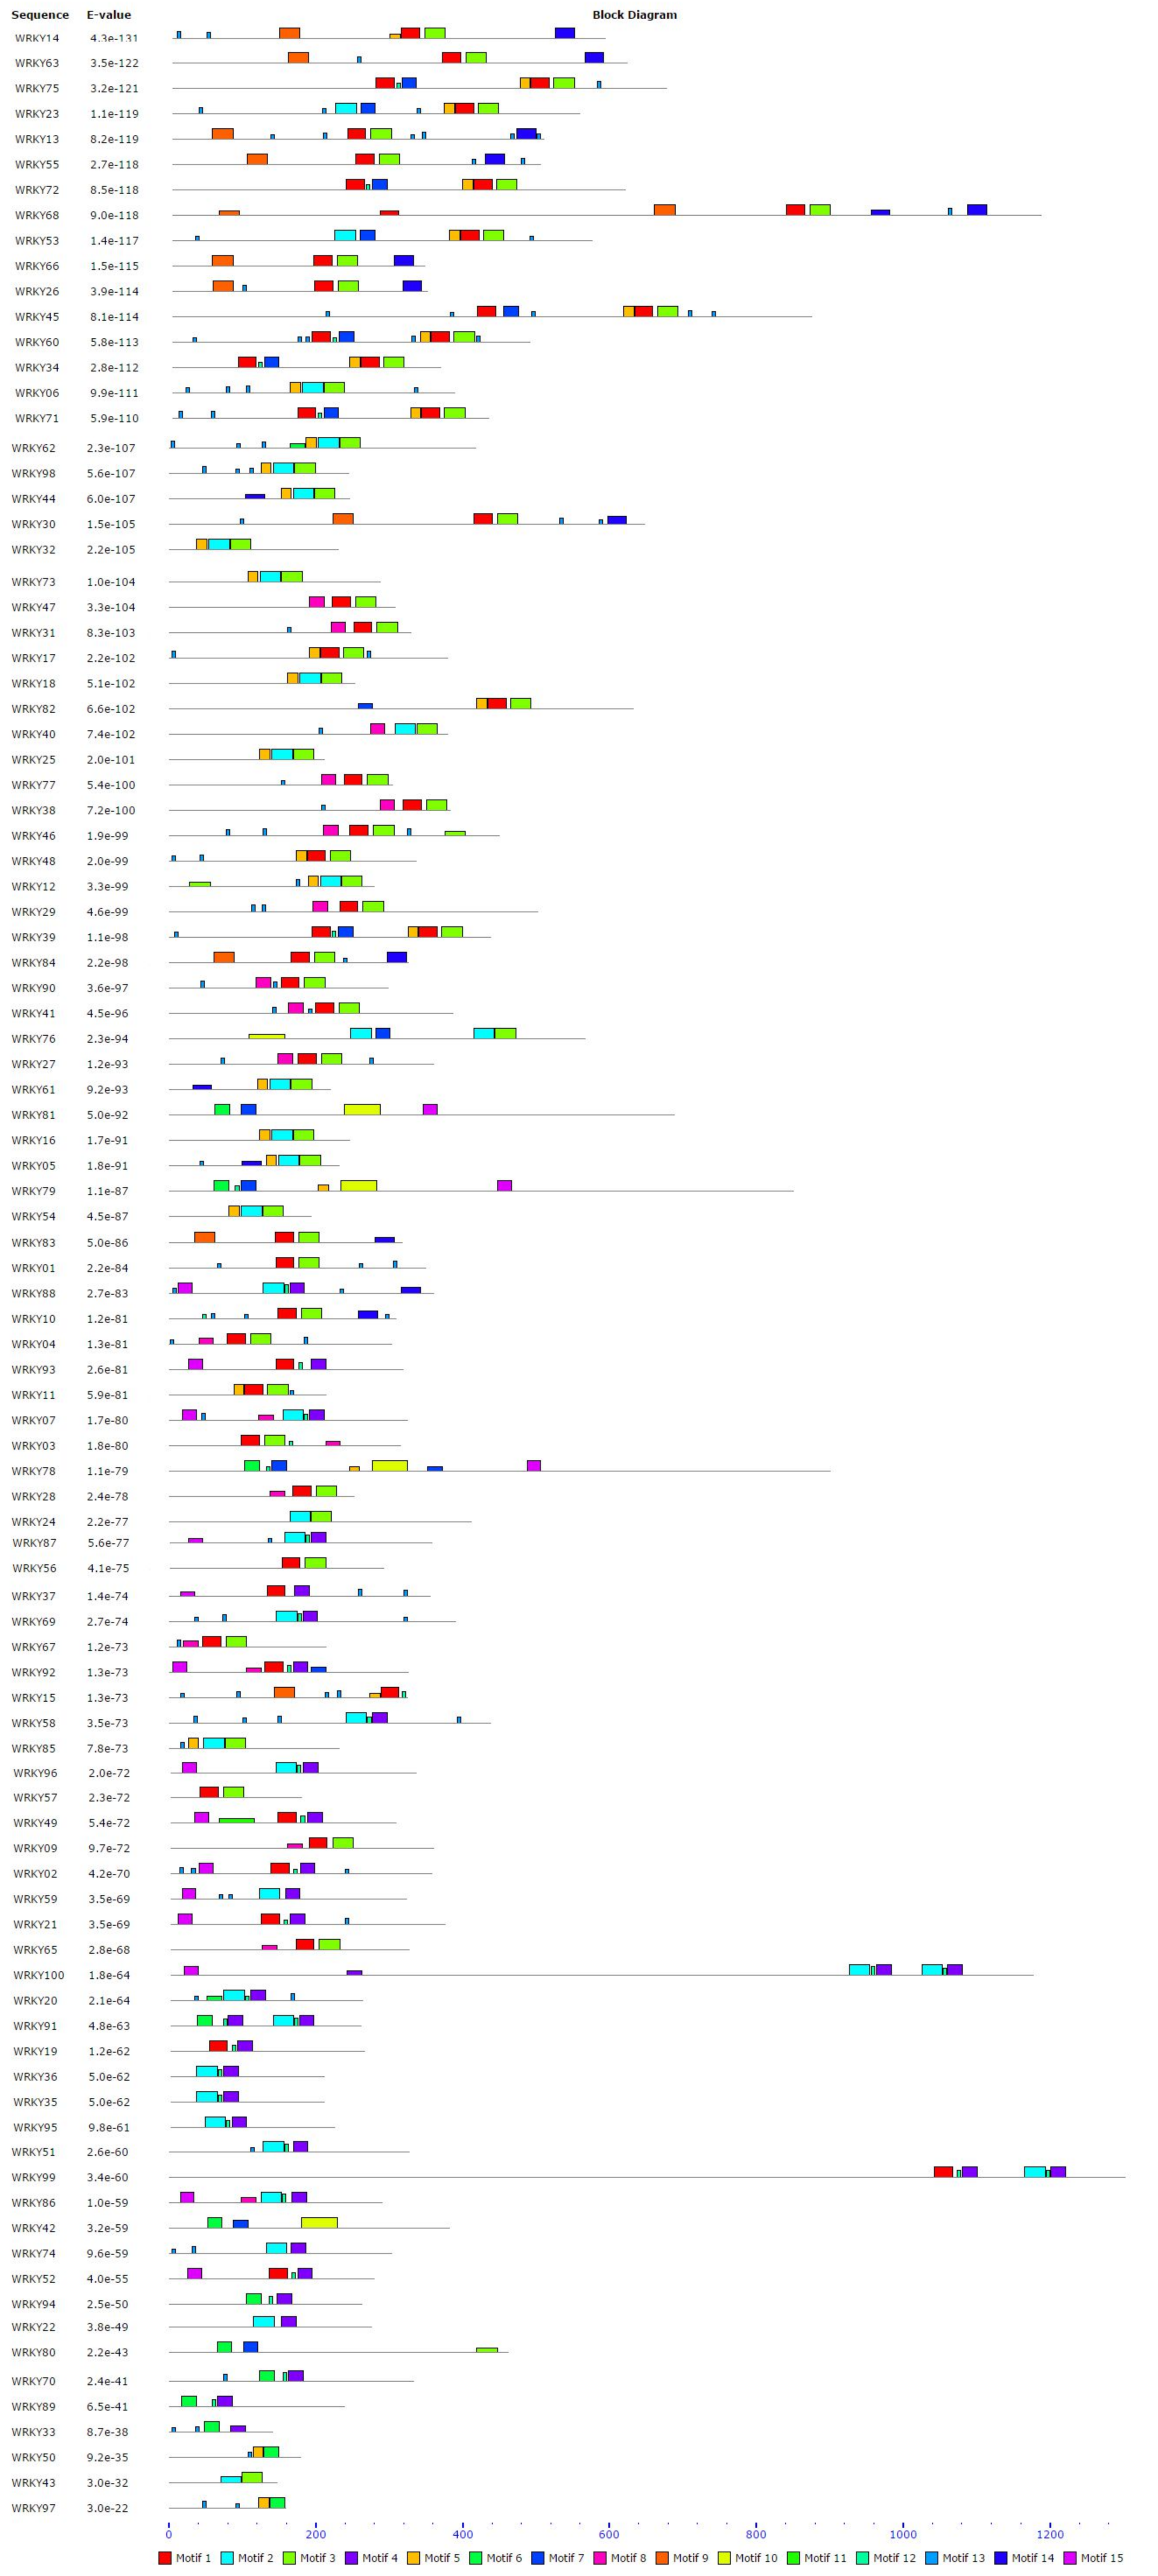

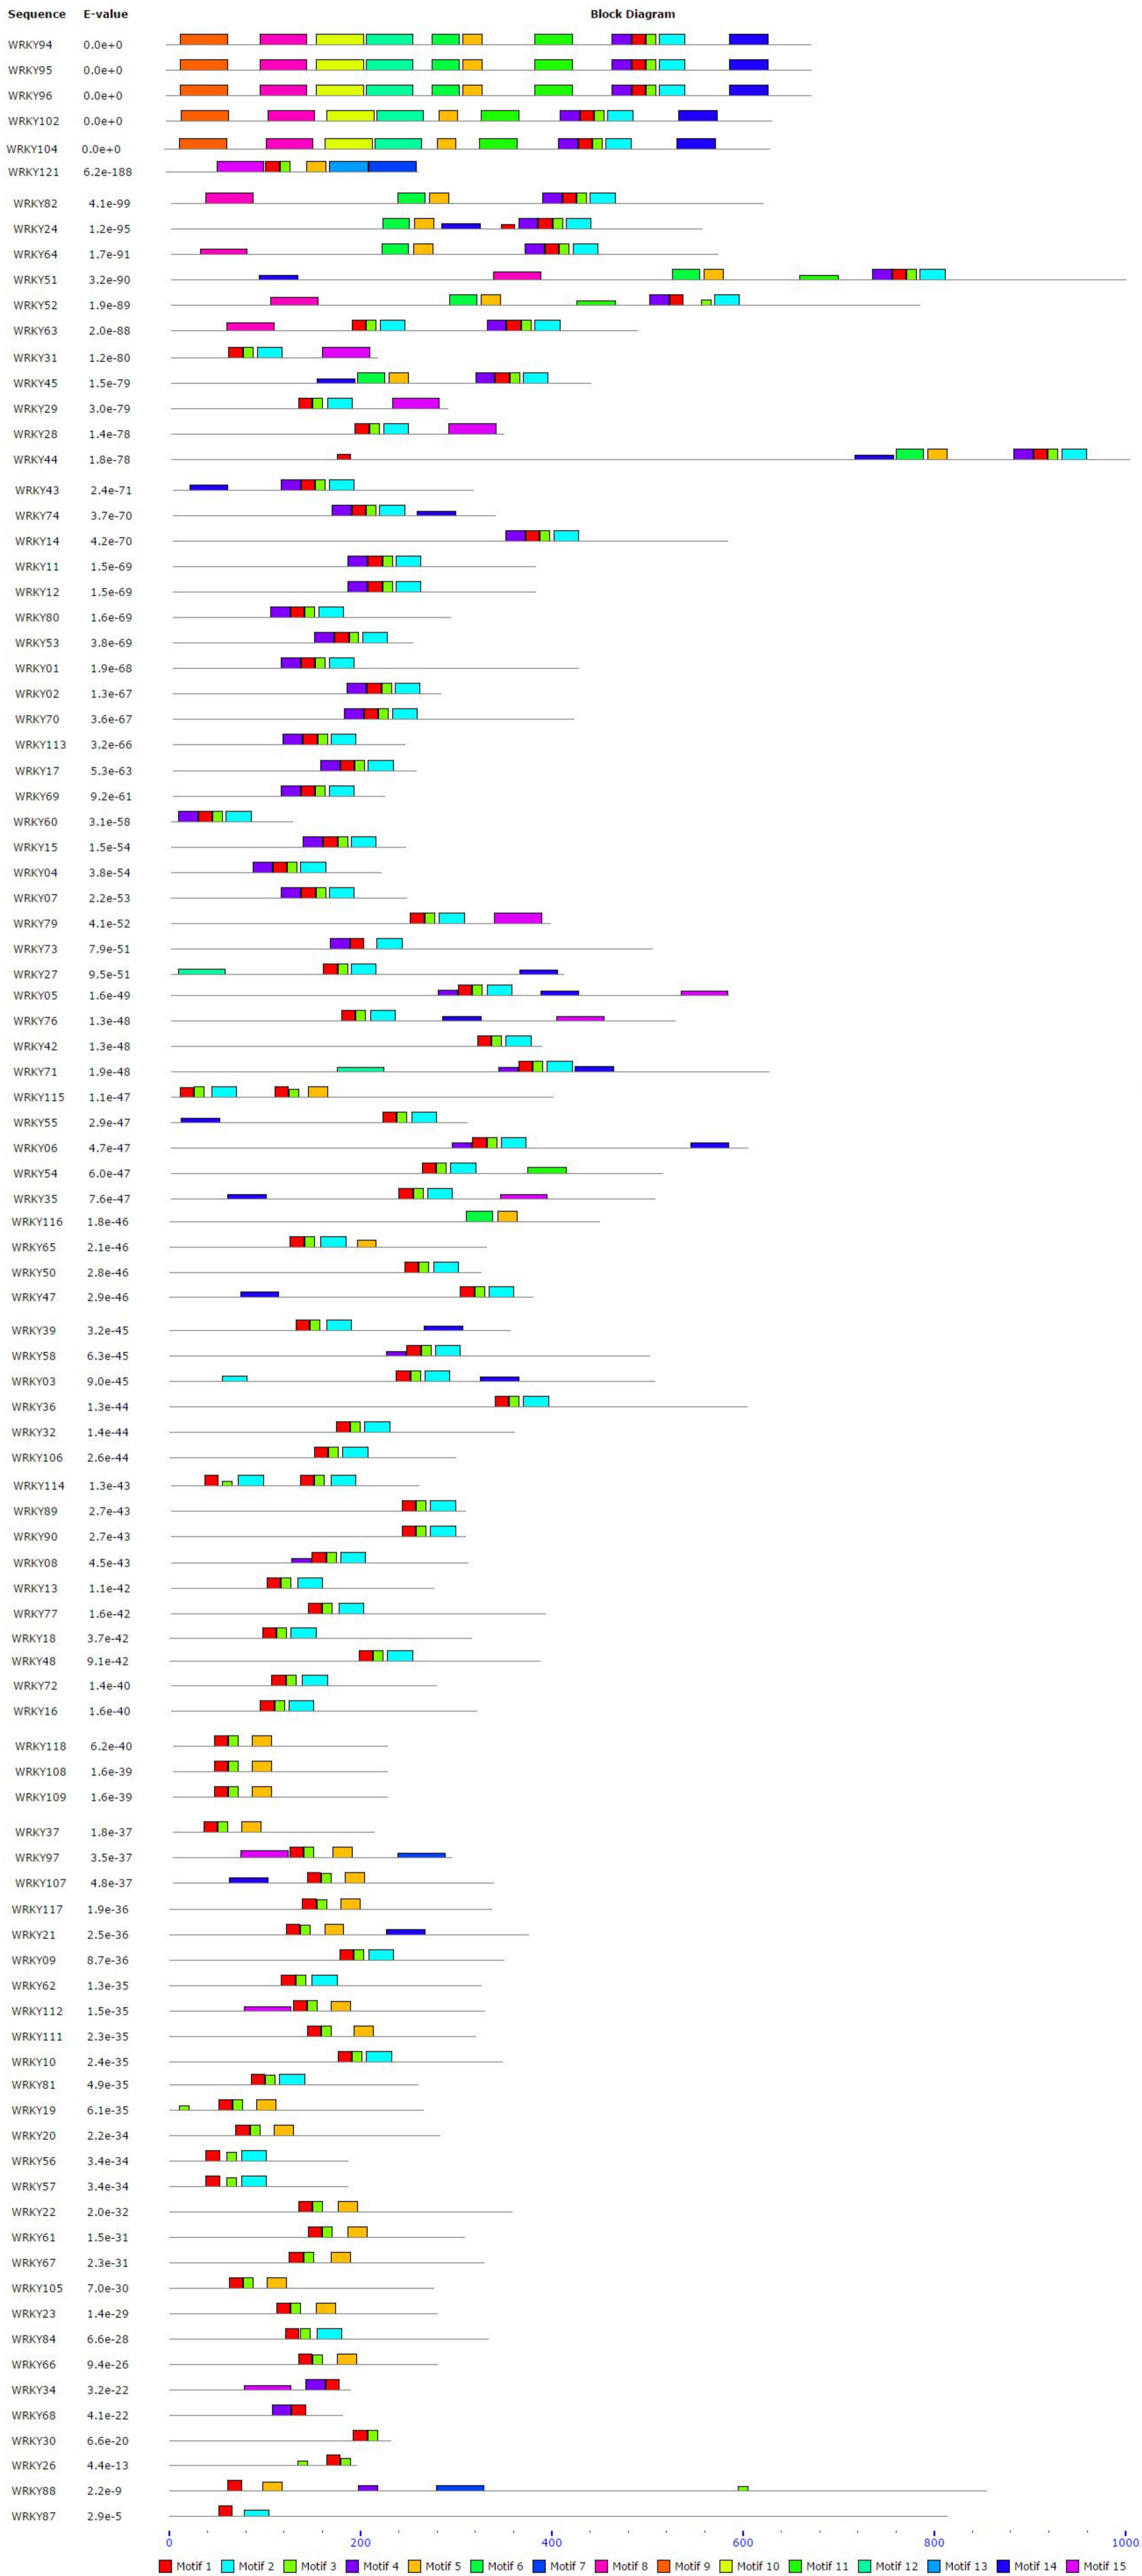

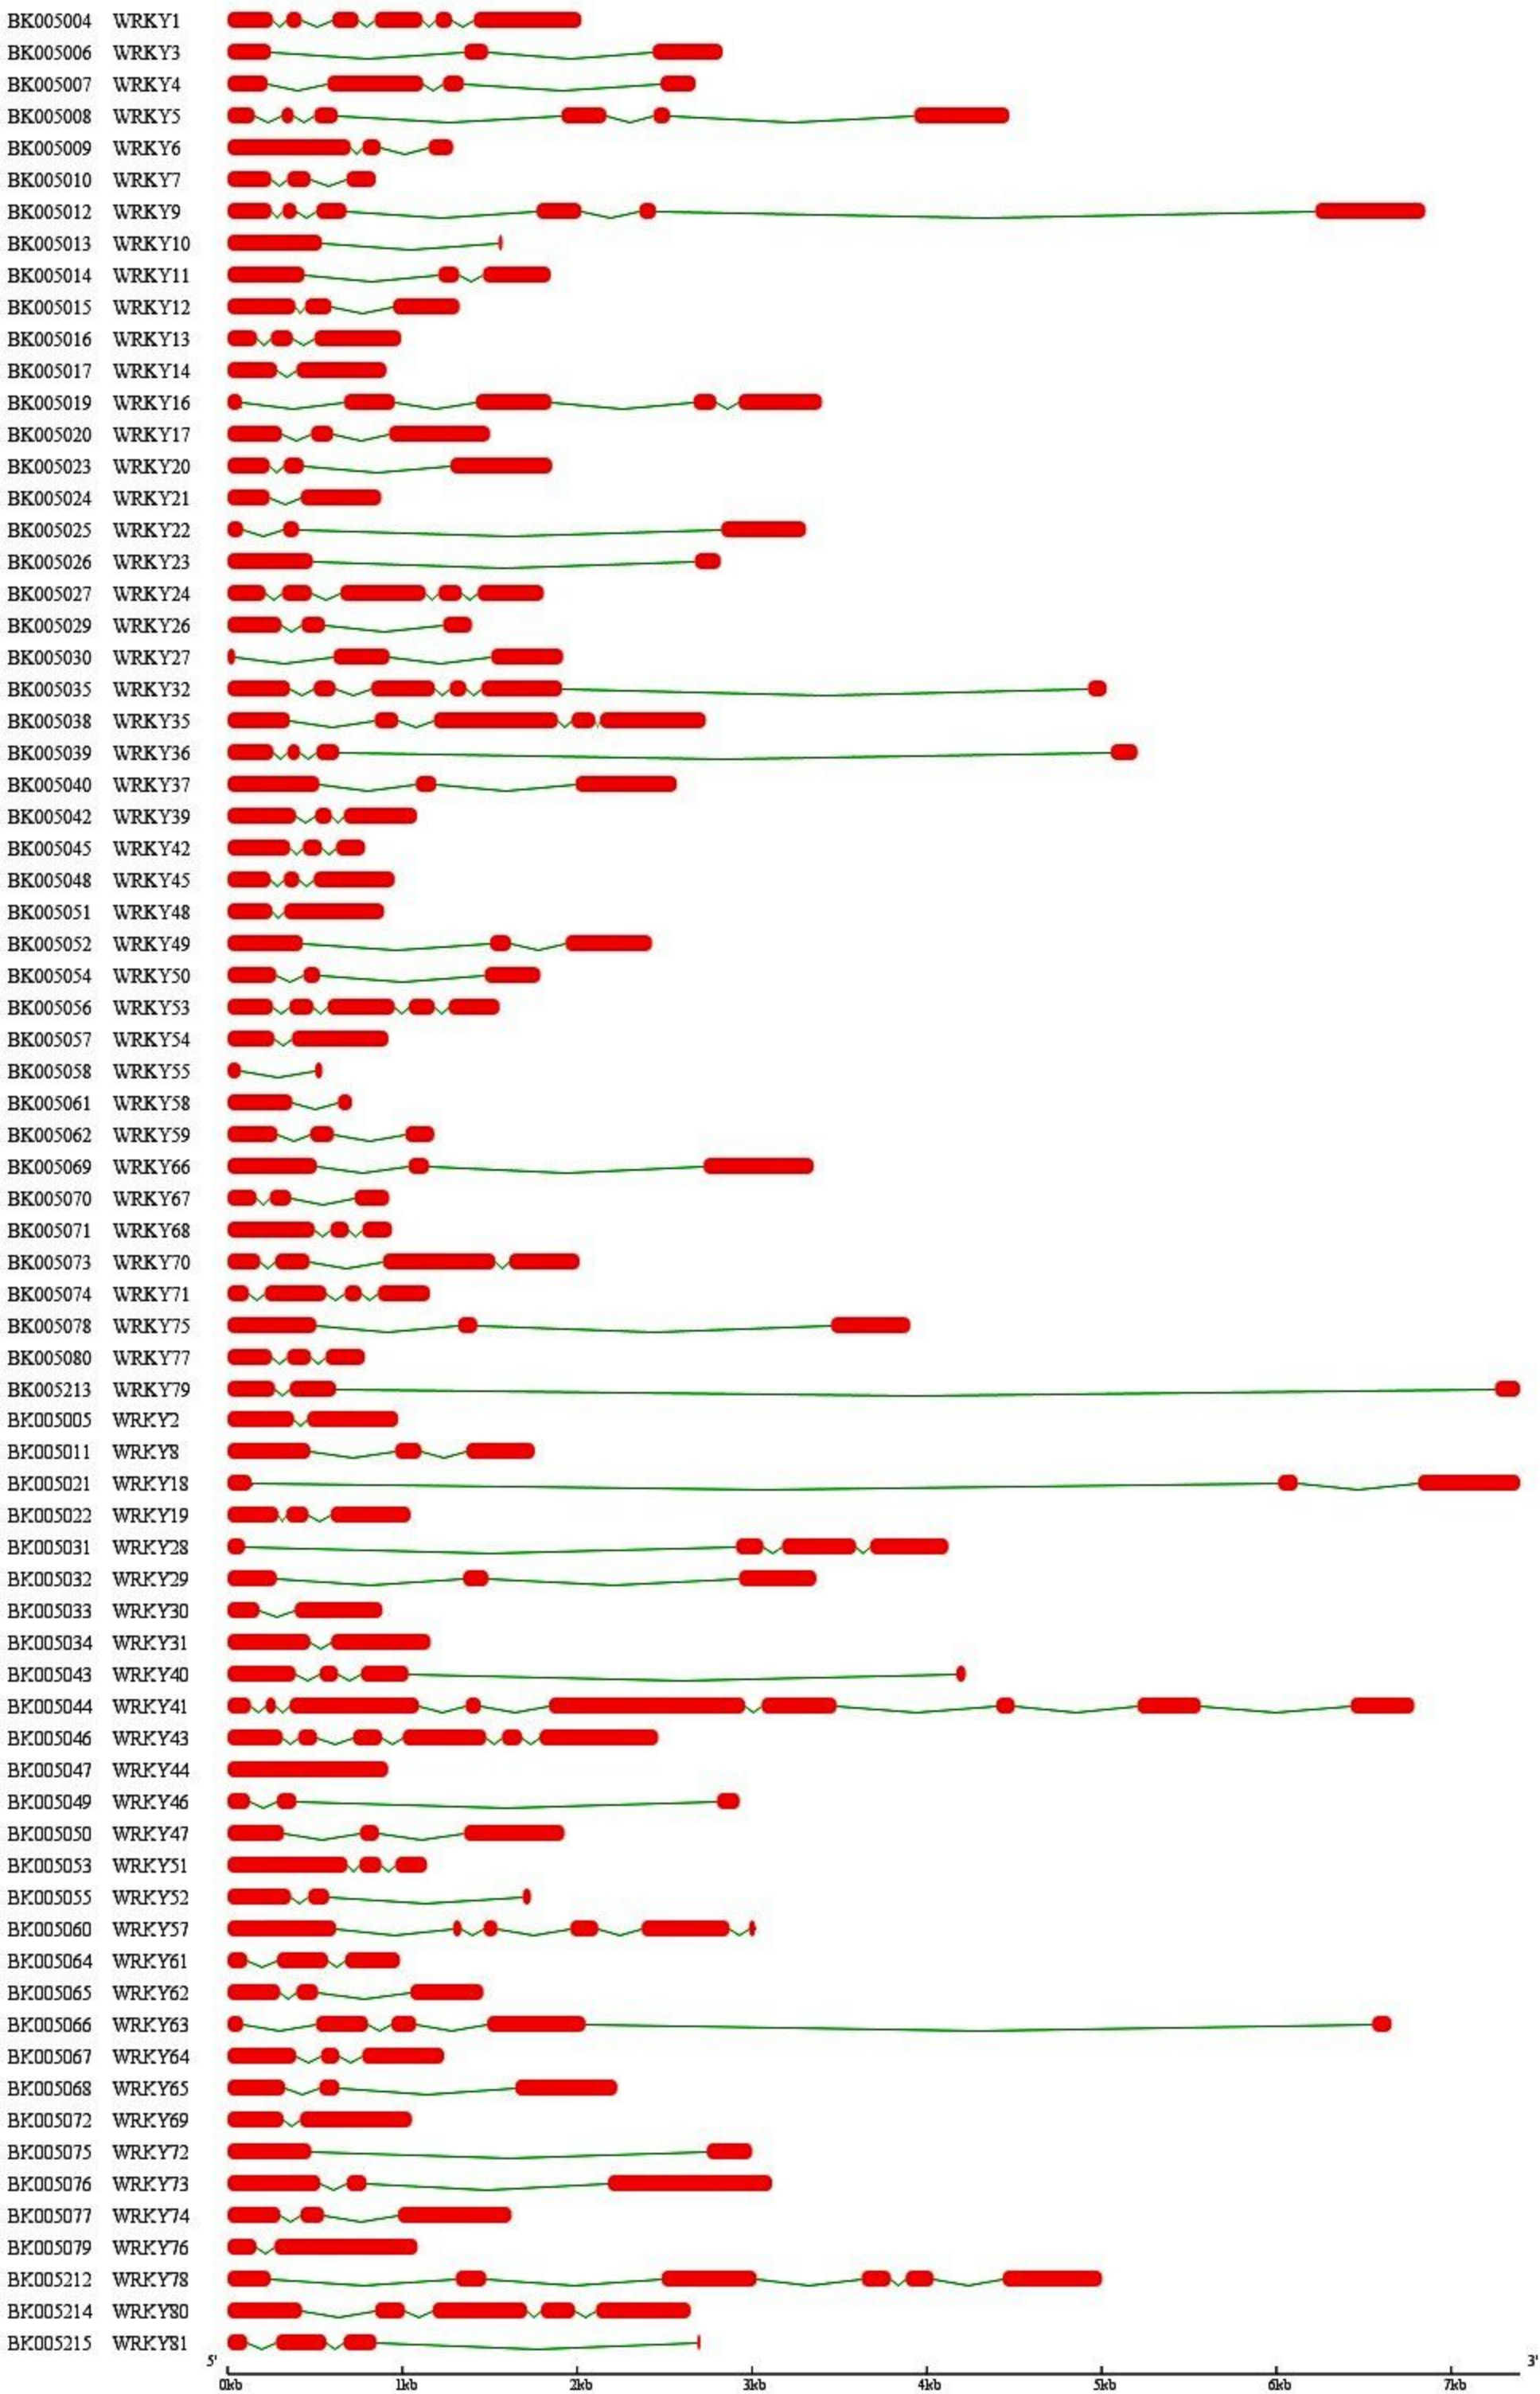

Legend:  
█ Exon  
— Intron

Expression in GSE18361

Expression in GSE19844

Expression in GSE7256

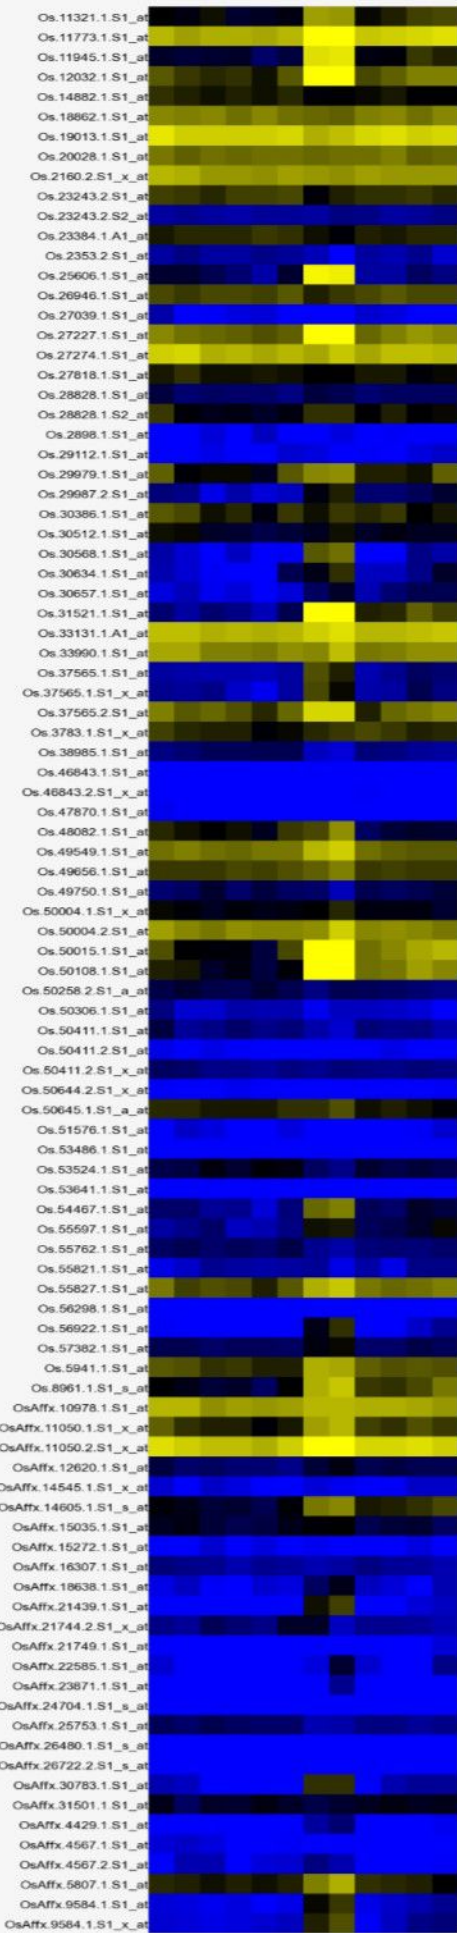

Mock\_root\_2dp-1  
 Mock\_root\_2dp-2  
 Mock\_root\_4dp-1  
 Mock\_root\_4dp-2  
 Mock\_root\_6dp-1  
 Mock\_root\_6dp-2  
 Guy11\_root\_2dp-1  
 Guy11\_root\_2dp-2  
 Guy11\_root\_4dp-1  
 Guy11\_root\_4dp-2  
 Guy11\_root\_6dp-1  
 Guy11\_root\_6dp-2

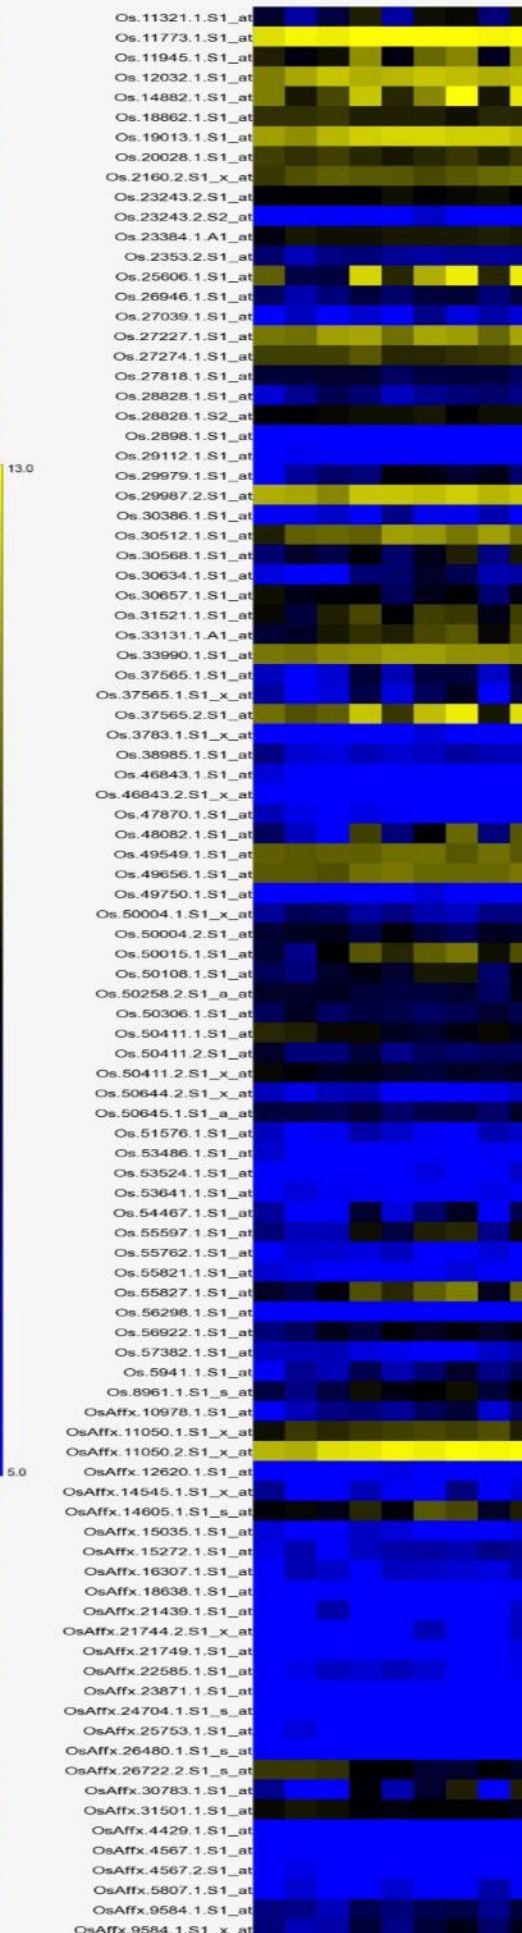

Mock-1  
 Mock-2  
 Mock-3  
 BA13\_Delta\_ilic-1  
 BA13\_Delta\_ilic-2  
 BA13\_Delta\_ilic-3  
 BA13-1  
 BA13-2  
 BA13-3

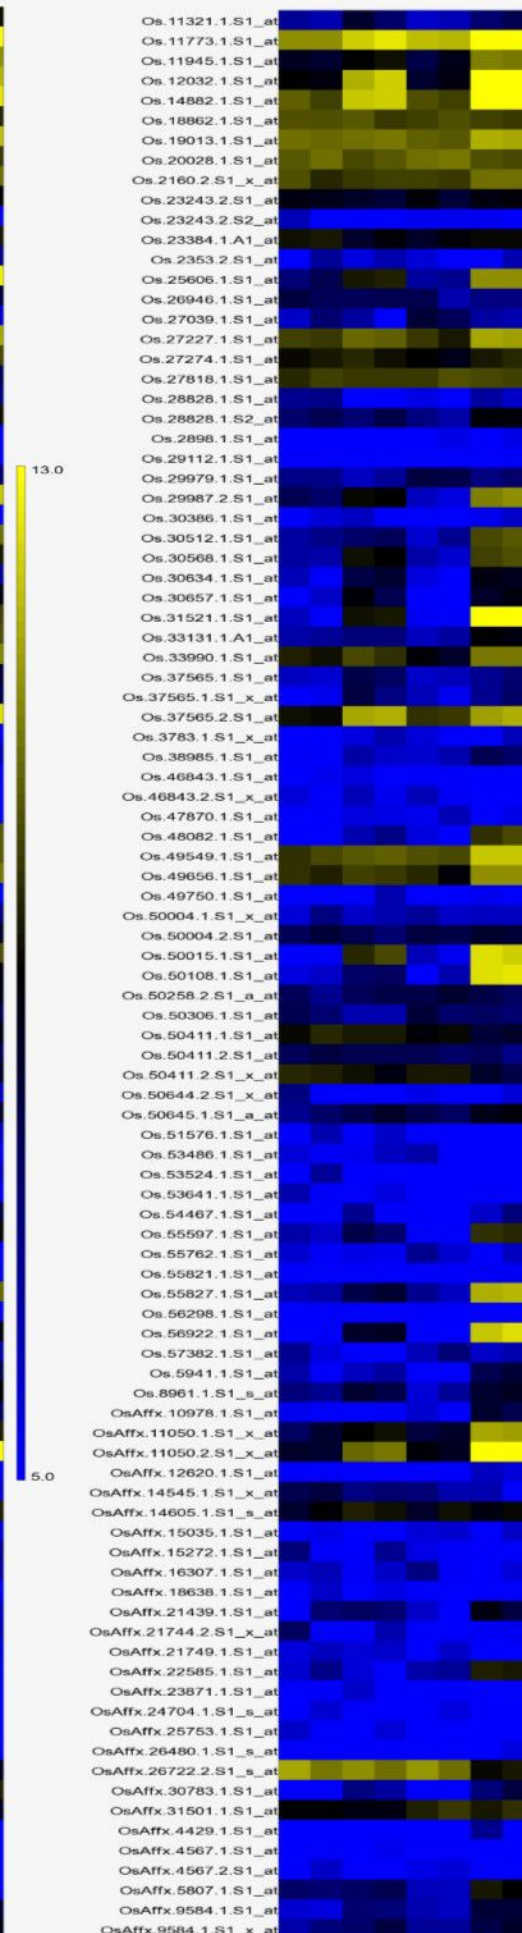

Mock\_3dp-1  
 Mock\_3dp-2  
 FR13\_3dp-1  
 FR13\_3dp-2  
 Mock\_4dp-1  
 Mock\_4dp-2  
 FR13\_4dp-1  
 FR13\_4dp-2

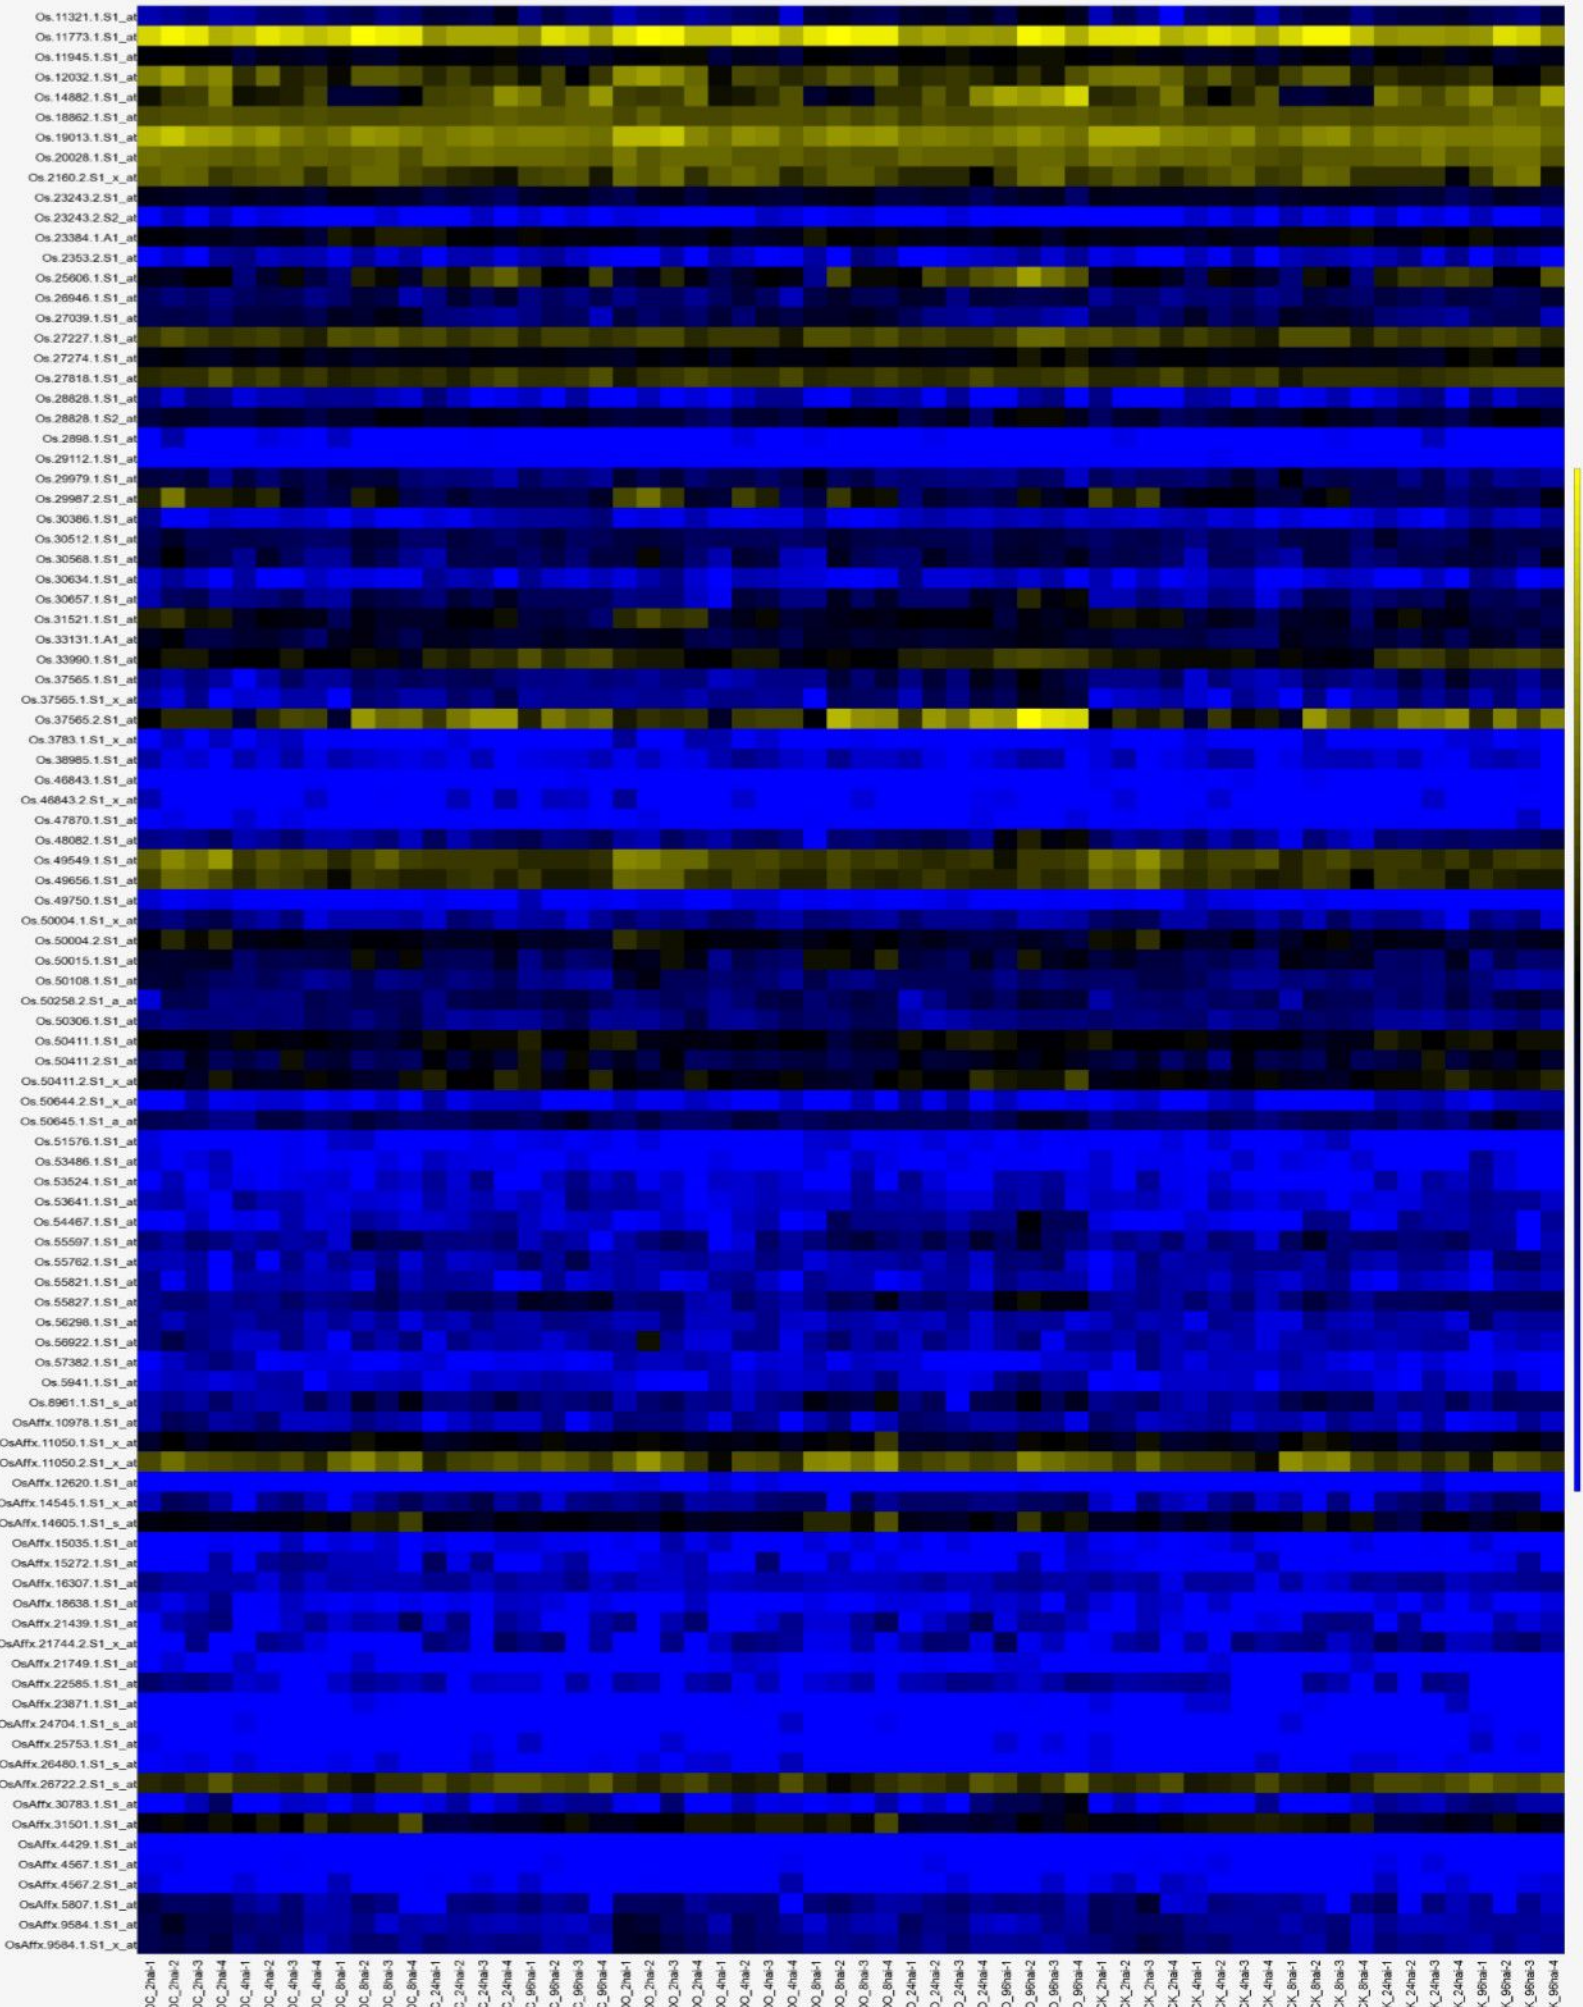

100

50

Expression in OS4

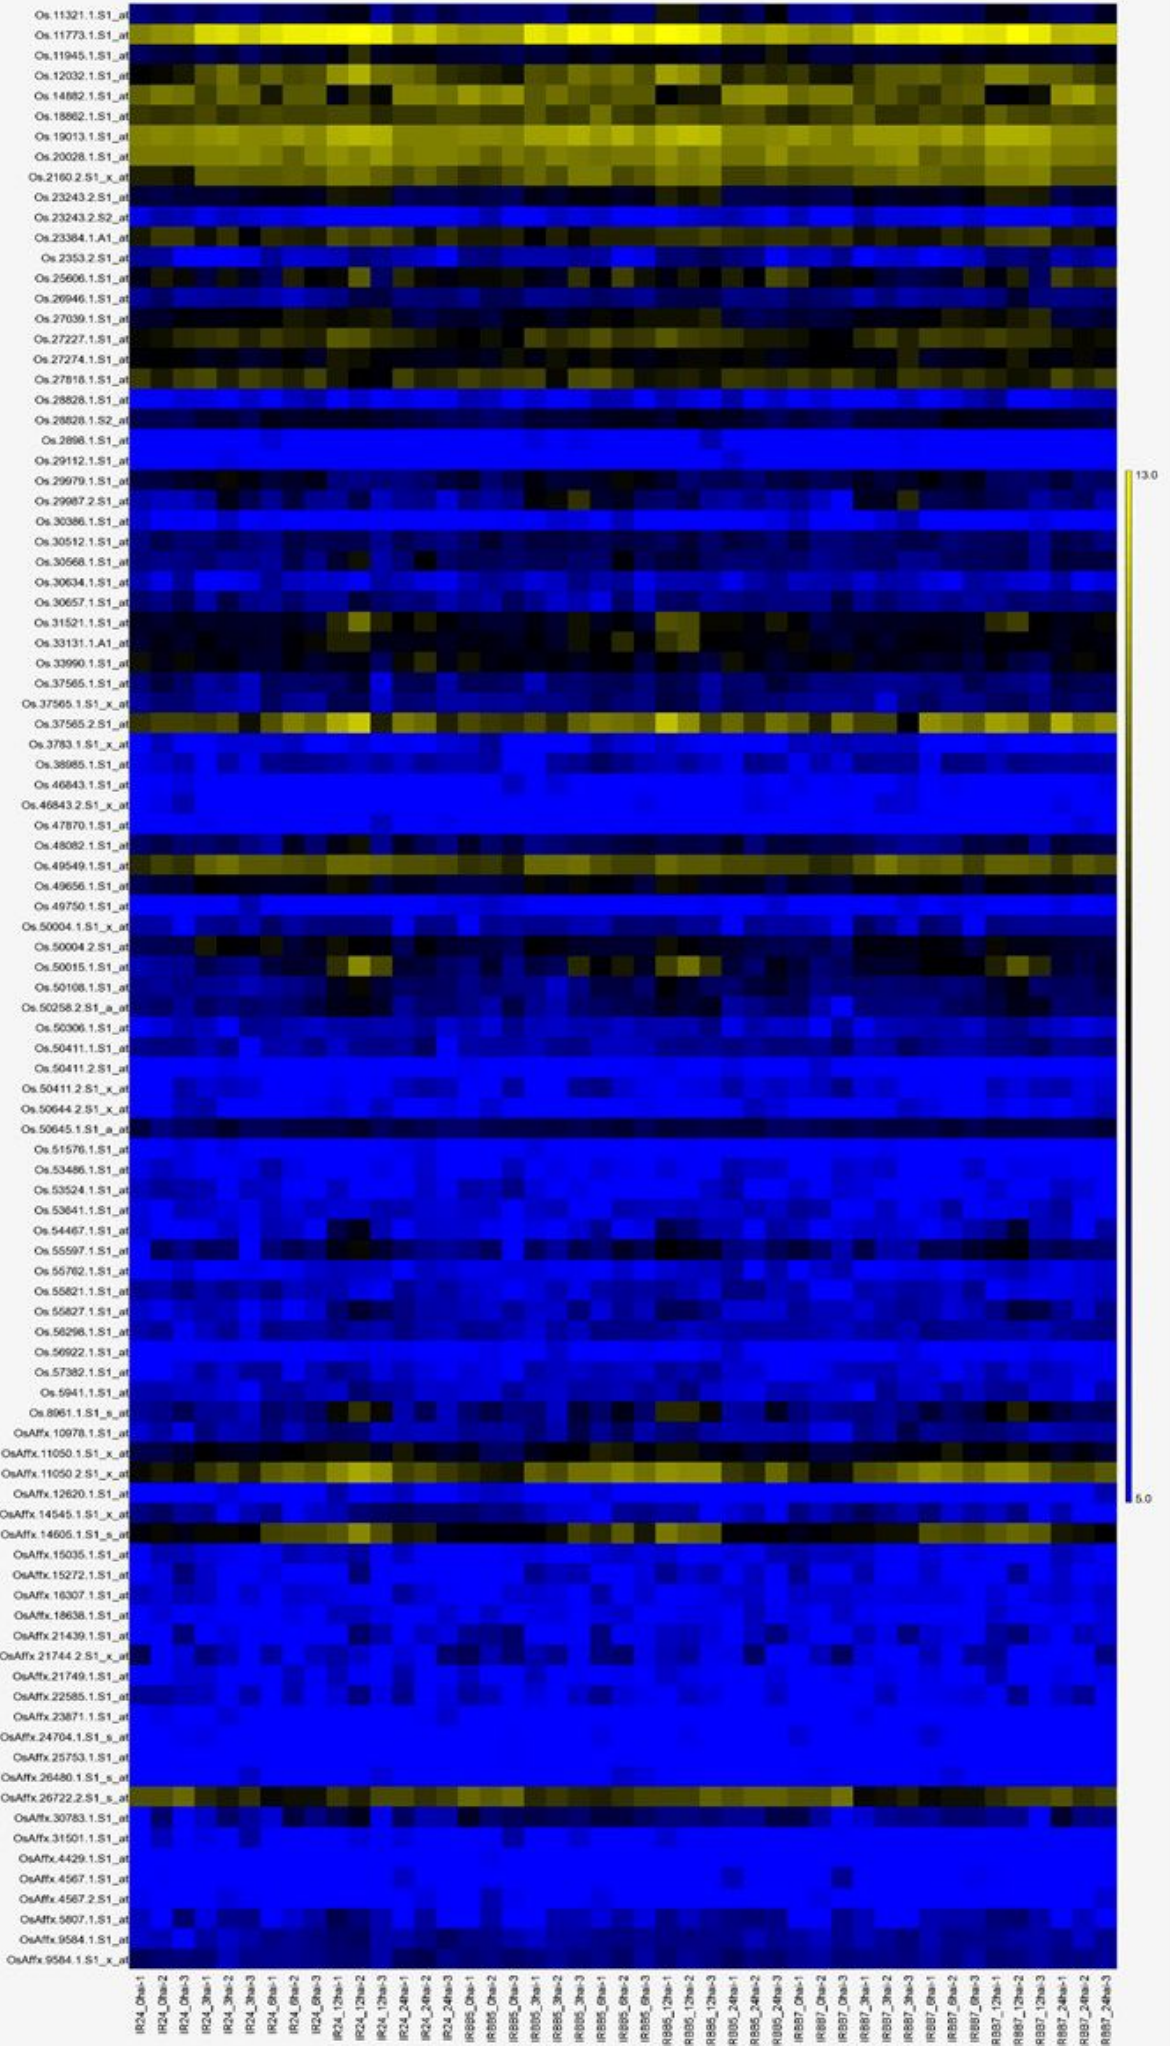

### Expression in GSE5906

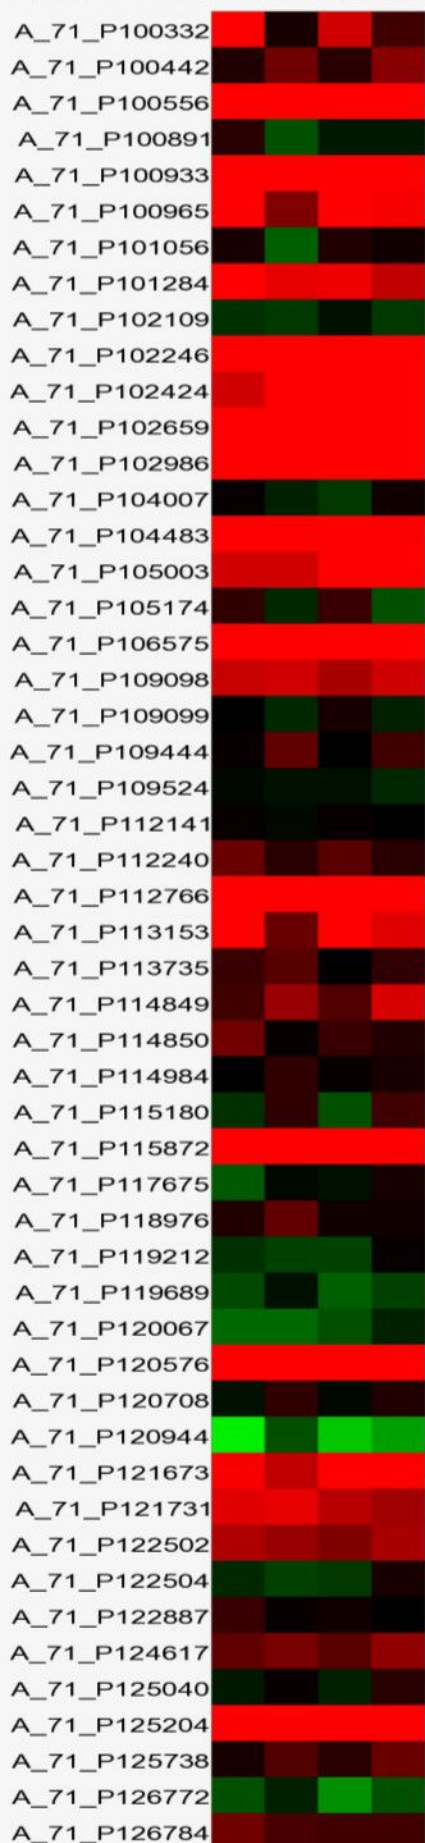

### Expression in GSE6244

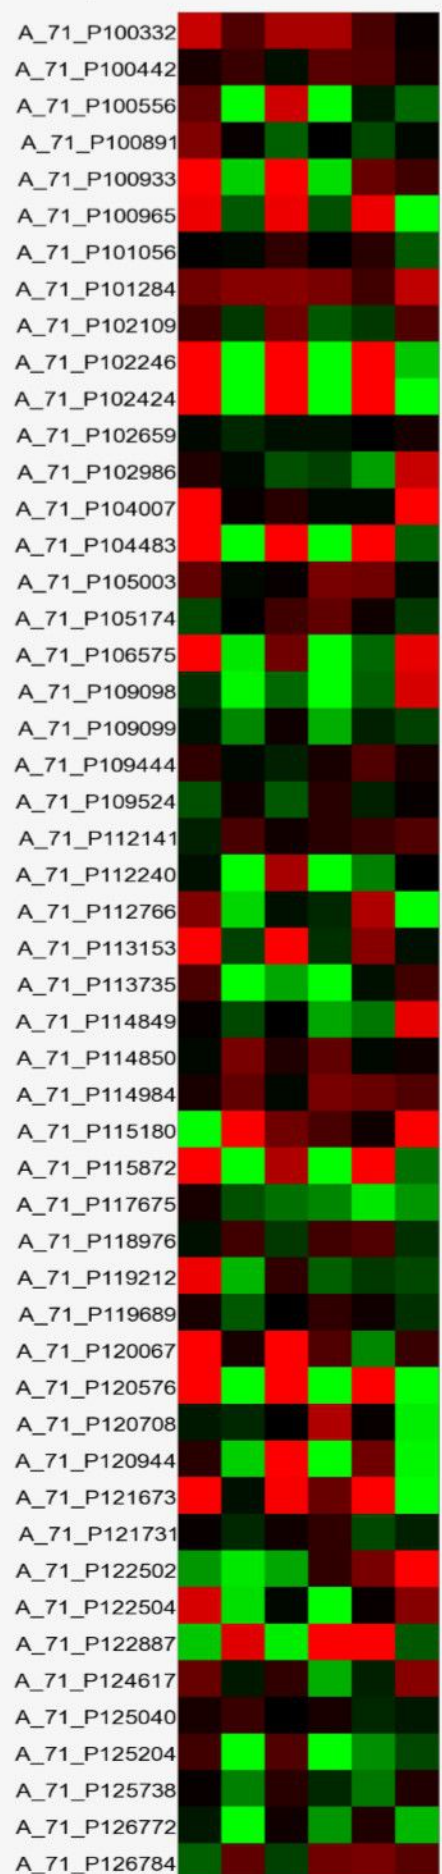

### Expression in GSE8518

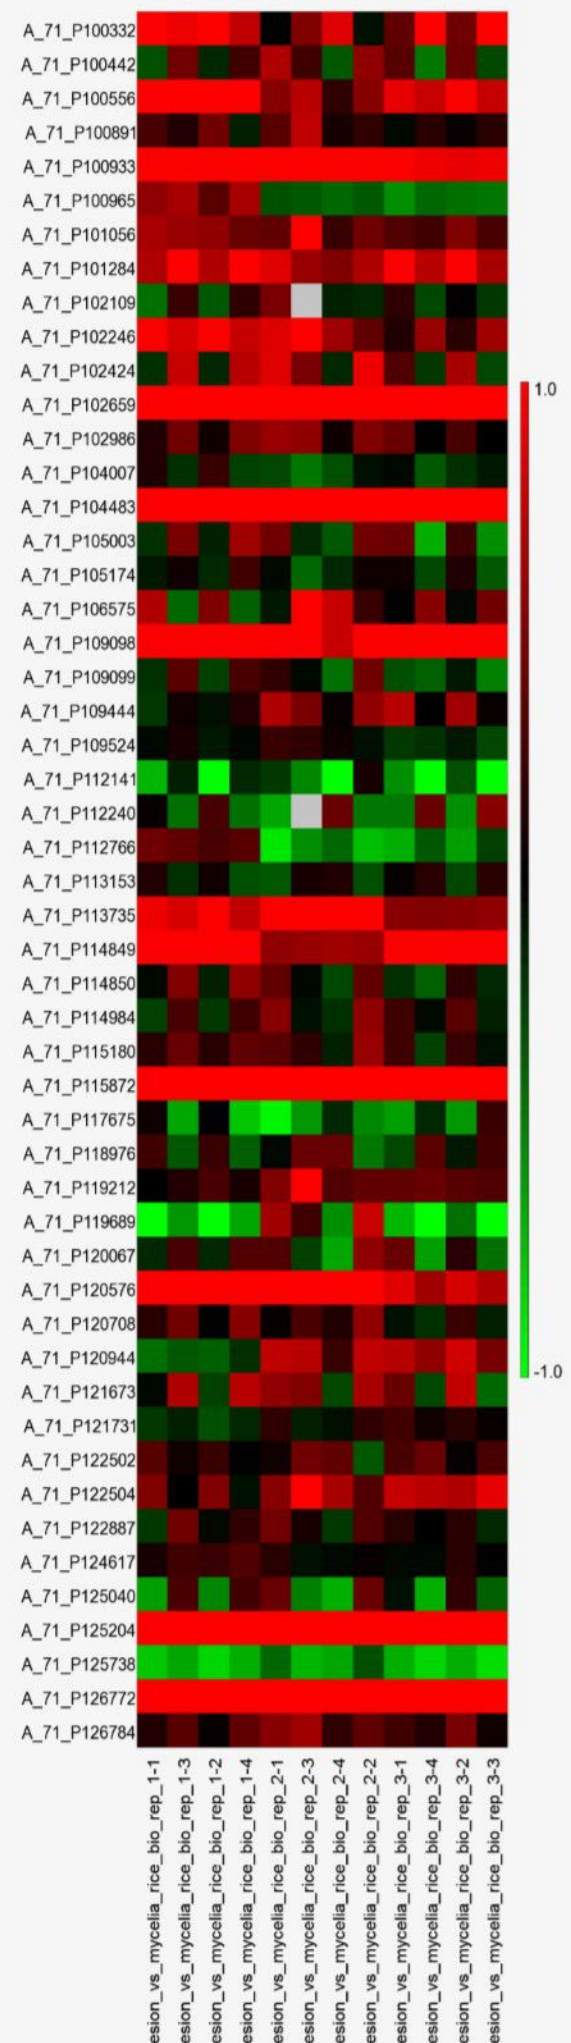

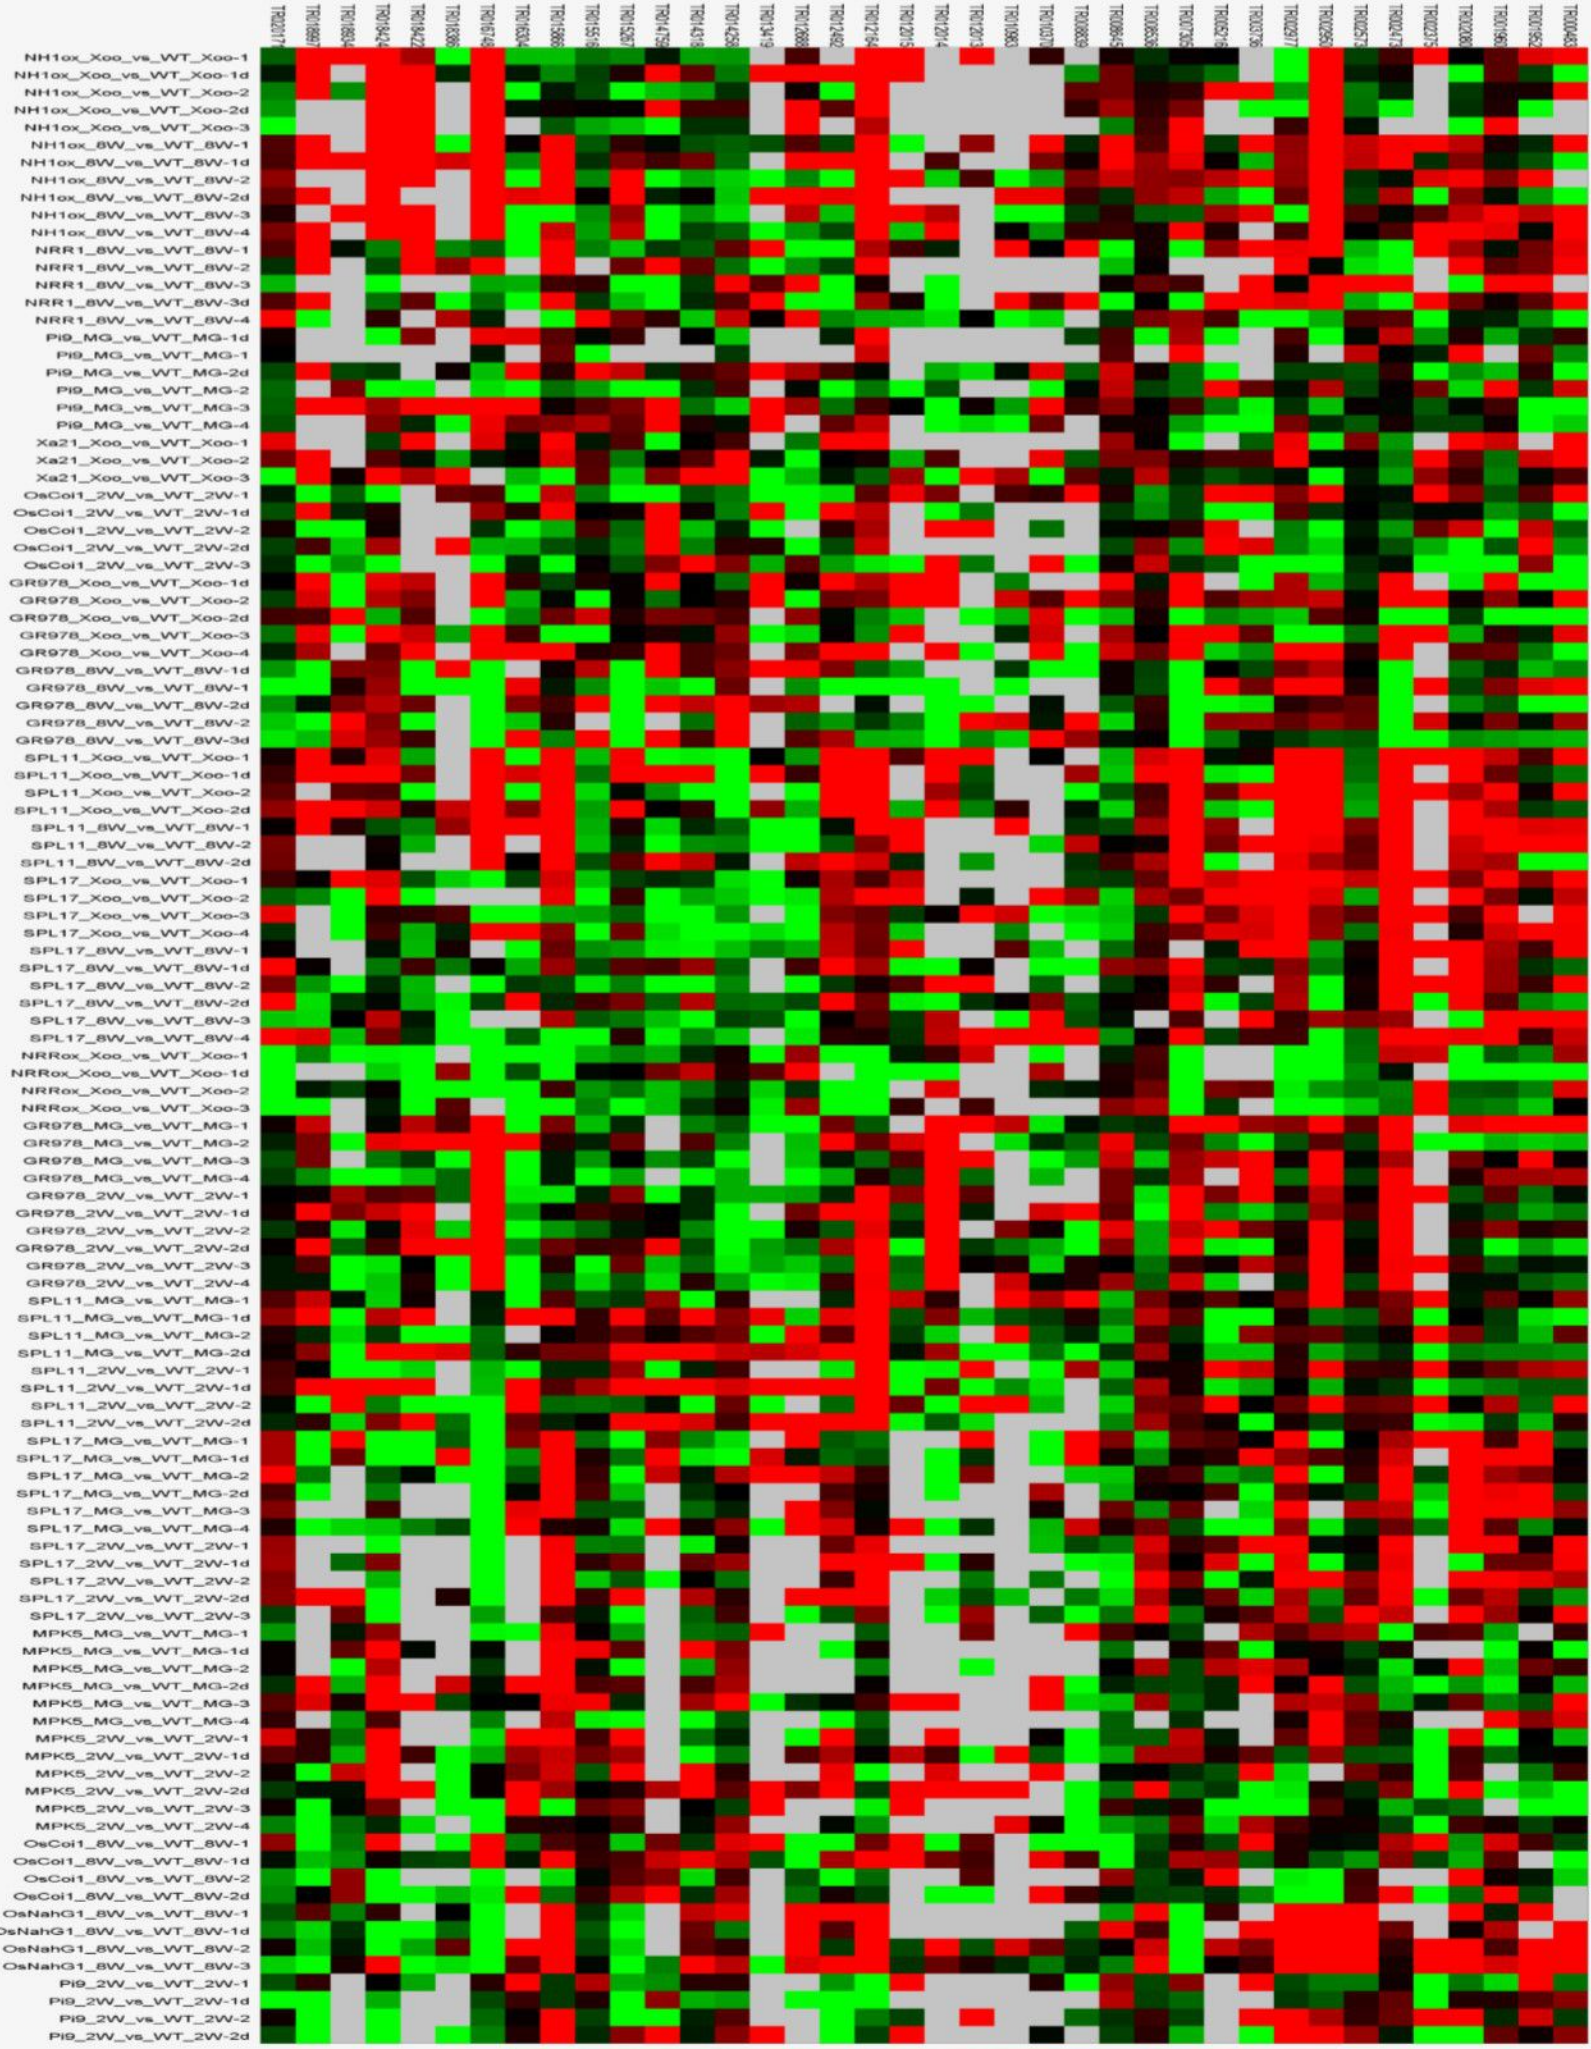



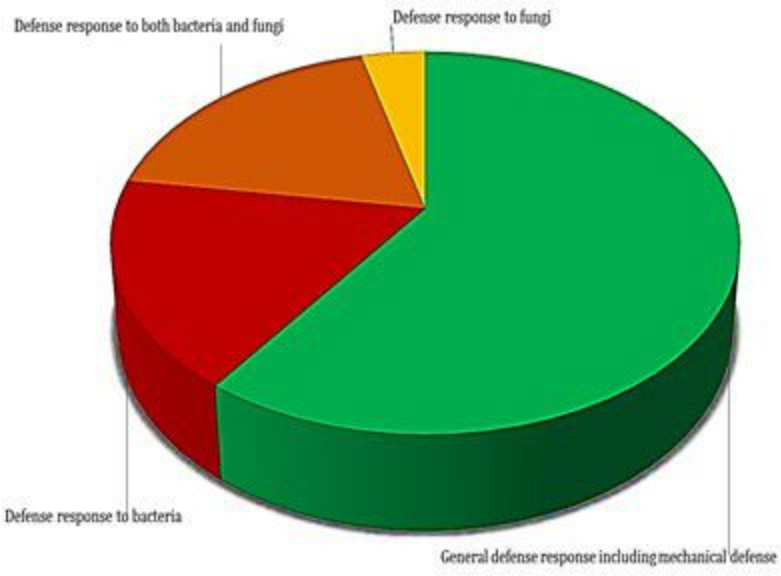

**a**

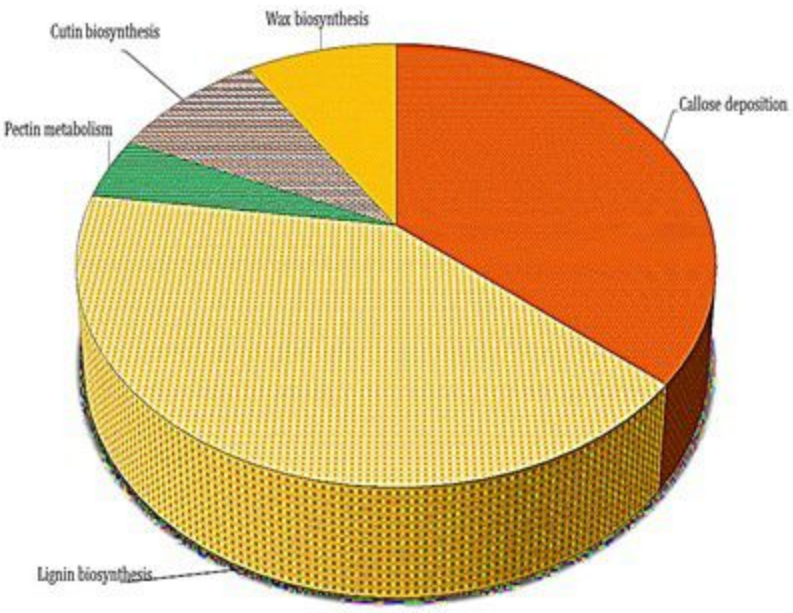

**b**

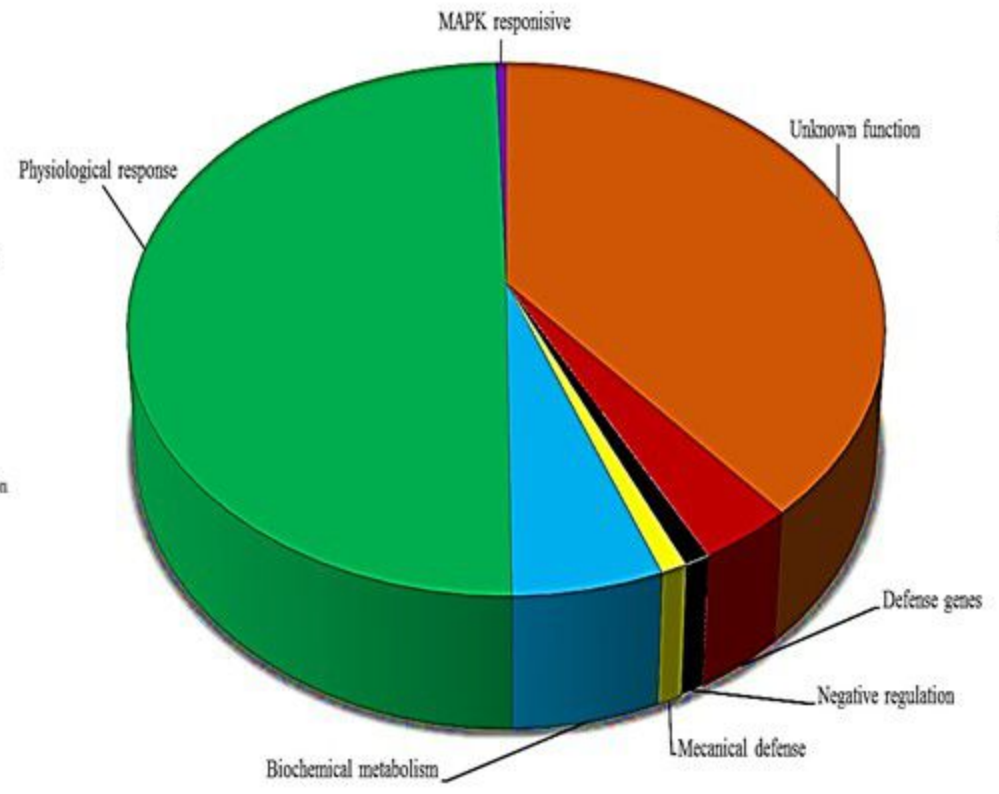

**c**

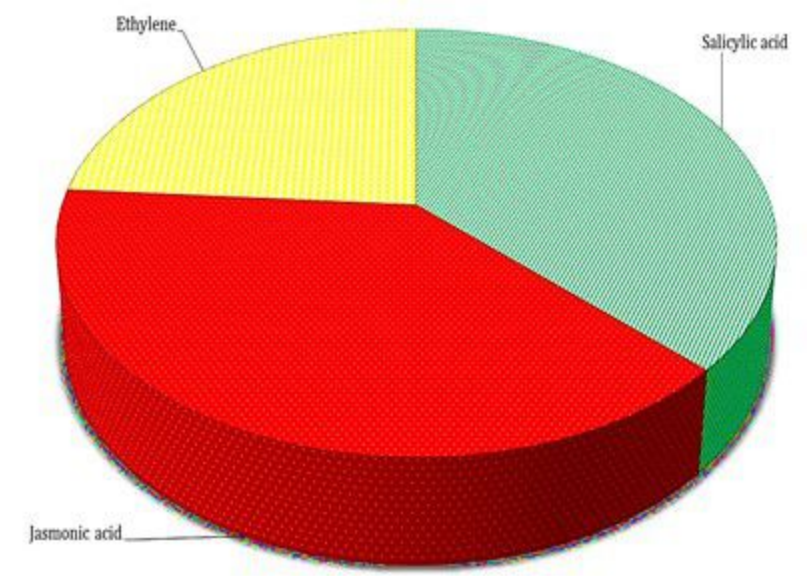

**d**

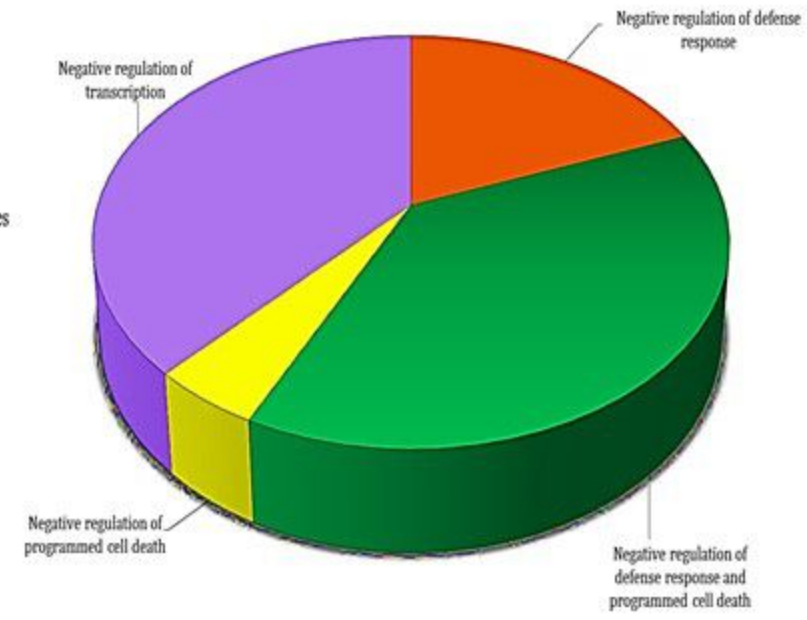

**e**

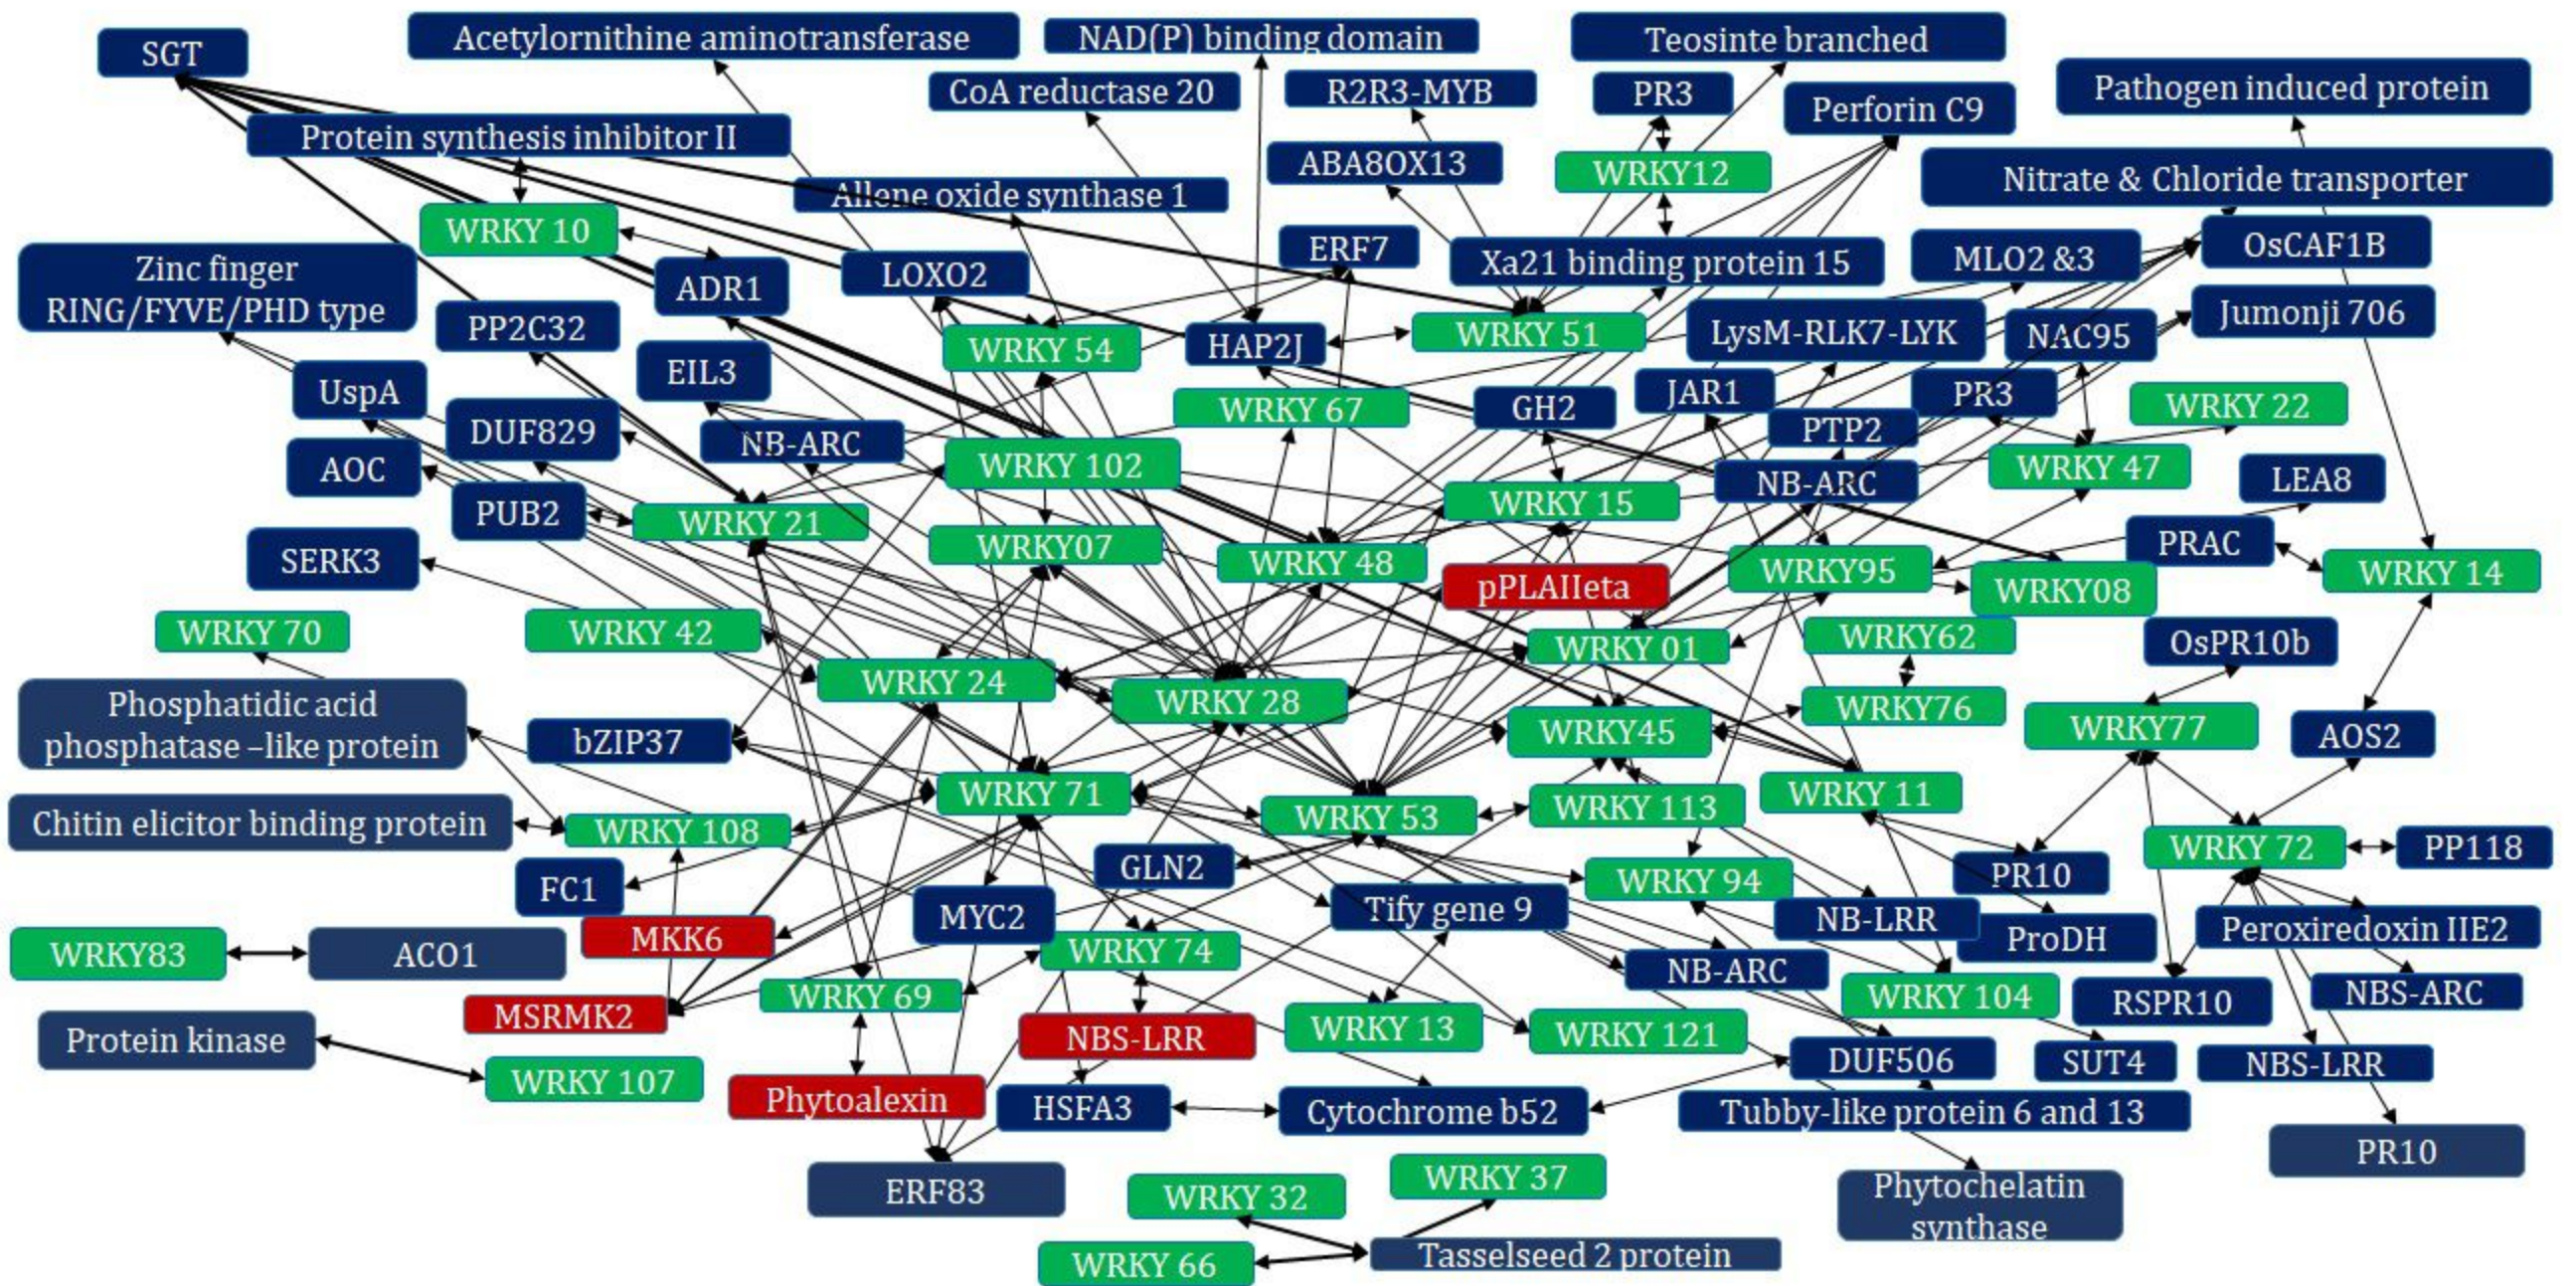

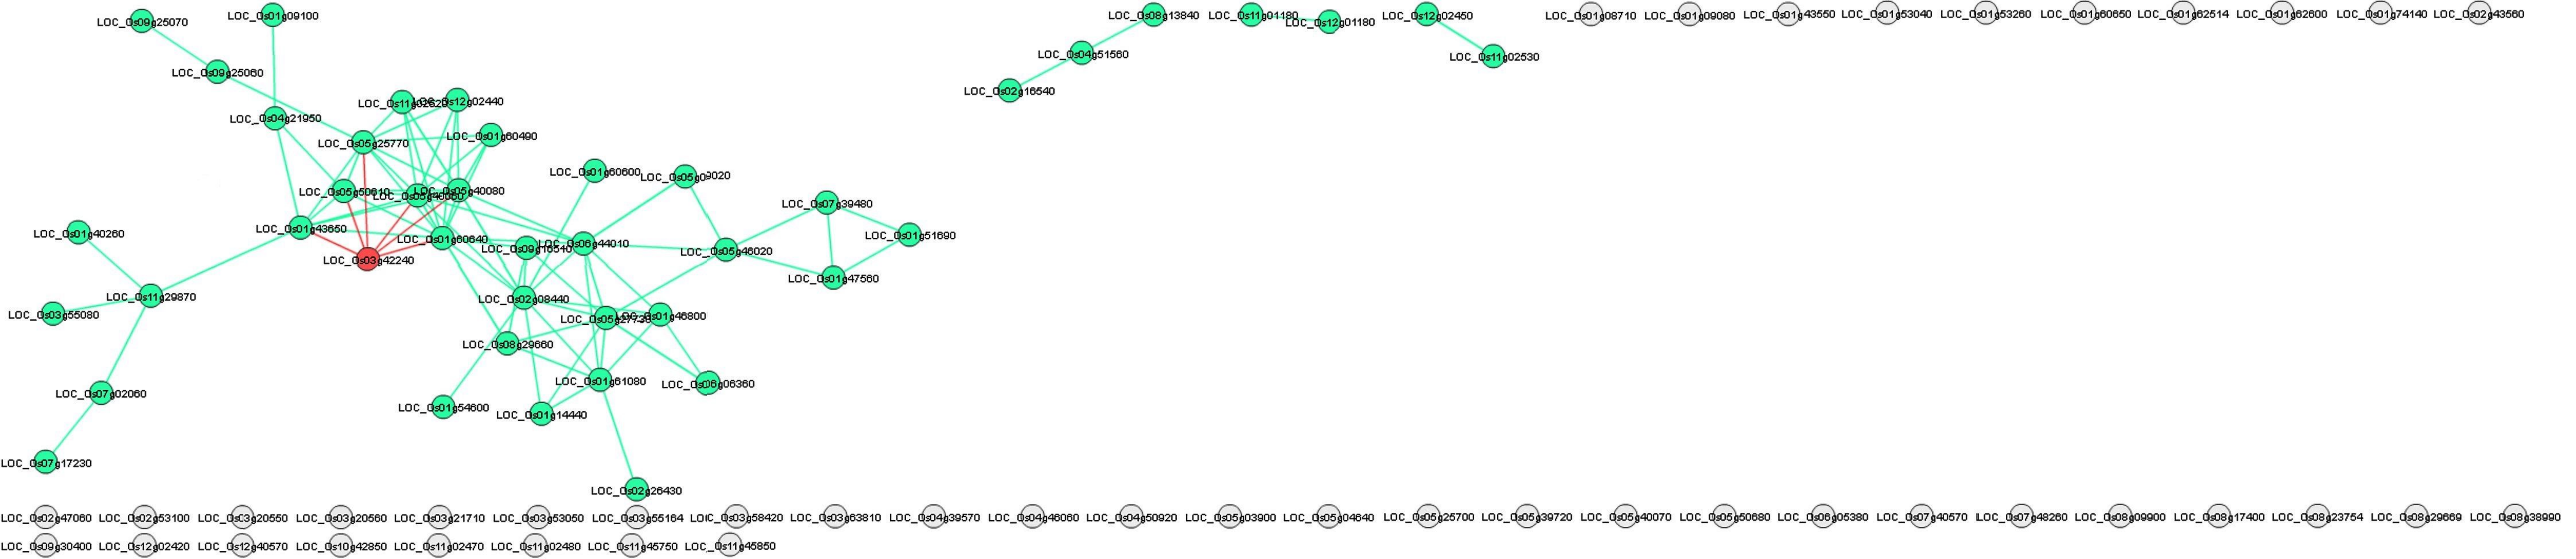

Supplement: Combined_pdf_-_Supplementary_Figures_xyz17870f46ce8b9.pdf [file Combined_pdf_-_Supplementary_Figures_xyz17870f46ce8b9.pdf]
