# Supplementary material for: Variations in the Structure and Evolution of Rice WRKY Genes in Indica and Japonica Genotypes and their Co-expression Network in Mediating Disease Resistance
Source: PubMed Central journal article supplement — Evol Bioinform Online. 2019 Jun 15;15:1176934319857720. doi: 10.1177/1176934319857720 (PMC6572876; doi:10.1177/1176934319857720), 2019-06-15
Supplement: Jimmy_Manuscript_-_EB_-_Supplementary_Tables_xyz178700578937f.pdf [file Jimmy_Manuscript_-_EB_-_Supplementary_Tables_xyz178700578937f.pdf]

## Supplementary Tables

Supplementary Table 1. WRKY genes of *indica* and *japonica* rice

| Chromosome No. | Number of WRKY genes in rice chromosomes |                 |
|----------------|------------------------------------------|-----------------|
|                | <i>indica</i>                            | <i>japonica</i> |
| 1              | 23                                       | 26              |
| 2              | 6                                        | 9               |
| 3              | 10                                       | 12              |
| 4              | 8                                        | 6               |
| 5              | 17                                       | 20              |
| 6              | 4                                        | 4               |
| 7              | 7                                        | 5               |
| 8              | 1                                        | 12              |
| 9              | 5                                        | 8               |
| 10             | 2                                        | 2               |
| 11             | 12                                       | 9               |
| 12             | 6                                        | 13              |
| <b>Total</b>   | <b>101</b>                               | <b>126</b>      |

**Supplementary Table 2.** WRKY TF gene models in *indica* rice

| Gene symbol | Gene ID      | Chromosome no. | Gene names | Group | Conserved motif | Domain number | Zinc finger |
|-------------|--------------|----------------|------------|-------|-----------------|---------------|-------------|
| WRKY 01     | BGIOGA013535 | 3              | OsI_13453  | II    | WRKYGQK         | 1             | C2H2        |
| WRKY 01     | BGIOGA035895 | 12             | OsI_38986  | II    | WRKYGQK         | 1             | C2H2        |
| WRKY 02     | BGIOGA033505 | 10             | OsI_34795  | II    | WRKYGQK         | 1             | C2H2        |
| WRKY 03     | BGIOGA000583 | 1              | OsI_04237  | III   | WRKYGQK         | 1             | C2HC        |
| WRKY 03     | BGIOGA009781 | 3              | OsI_13604  | II    | WRKYGQK         | 1             | C2H2        |
| WRKY 04     | BGIOGA010657 | 3              | OsI_11758  | Ia    | 2XWRKYGQK       | 2             | C2H2        |
| WRKY 04     | BGIOGA013598 | 3              | -          | Ia    | 2XWRKYGQK       | 2             | C2H2        |
| WRKY 05     | BGIOGA003851 | 1              | OsI_02595  | II    | WRKYGQK         | 1             | C2H2        |
| WRKY 06     | BGIOGA013733 | 3              | OsI_13911  | II    | WRKYGQK         | 1             | C2H2        |
| WRKY 06     | BGIOGA023966 | 7              | OsI_26732  | Ia    | 2XWRKYGQK       | 2             | C2H2        |
| WRKY 07     | BGIOGA020266 | 5              | OsI_20783  | II    | WRKYGQK         | 1             | C2H2        |
| WRKY 08     | BGIOGA017481 | 4              | OsI_21151  | II    | WRKYGQK         | 1             | C2H2        |
| WRKY 09     | BGIOGA003306 | 1              | OsI_01473  | IV    | WRKYGQK         | 1             | NA          |
| WRKY 10     | BGIOGA002237 | 1              | OsI_00691  | II    | WRKYGQK         | 1             | C2H2        |
| WRKY 11     | BGIOGA004027 | 1              | OsI_02930  | II    | WRKYGQK         | 1             | C2H2        |
| WRKY 12     | BGIOGA001178 | 1              | OsI_02922  | II    | WRKYGQK         | 1             | C2H2        |
| WRKY 13     | BGIOGA000826 | 1              | OsI_03741  | II    | WRKYGQK         | 1             | C2H2        |
| WRKY 14     | BGIOGA000873 | 1              | OsI_03623  | II    | WRKYGQK         | 1             | C2H2        |
| WRKY 15     | BGIOGA001093 | 1              | OsI_03124  | III   | WRKYGQK         | 1             | C2HC        |
| WRKY 16     | BGIOGA001069 | 1              | OsI_03172  | II    | WRKYGQK         | 1             | C2H2        |
| WRKY 17     | BGIOGA005267 | 1              | OsI_05398  | II    | WRKYGQK         | 1             | C2H2        |
| WRKY 18     | BGIOGA004703 | 1              | OsI_04233  | III   | WRKYGQK         | 1             | C2HC        |
| WRKY 18     | BGIOGA032700 | 10             | OsI_33087  | III   | WRKYGQK         | 1             | C2HC        |
| WRKY 20     | BGIOGA004704 | 1              | OsI_04235  | III   | WRKYGQK         | 1             | C2HC        |
| WRKY 21     | BGIOGA004705 | 1              | OsI_04239  | III   | WRKYGQK         | 1             | C2HC        |
| WRKY 22     | BGIOGA004701 | 1              | OsI_04231  | III   | WRKYGQK         | 1             | C2HC        |
| WRKY 22     | BGIOGA020451 | 5              | OsI_21160  | II    | WRKYGQK         | 1             | C2H2        |
| WRKY 23     | BGIOGA004404 | 1              | OsI_03639  | II    | WRKYGQK         | 1             | C2H2        |
| WRKY 24     | BGIOGA004722 | 1              | OsI_04274  | Ia    | 2XWRKYGQK       | 2             | C2H2        |
| WRKY 25     | BGIOGA027404 | 7              | OsI_28346  | II    | WRKYGQK         | 1             | C2H2        |
| WRKY 27     | BGIOGA001327 | 1              | OsI_02614  | II    | WRKYGQK         | 1             | C2H2        |
| WRKY 28     | BGIOGA020778 | 6              | OsI_23911  | II    | WRKYGQK         | 1             | C2H2        |
| WRKY 29     | BGIOGA024948 | 7              | OsI_24642  | II    | WRKYGQK         | 1             | C2H2        |
| WRKY 30     | BGIOGA026734 | 7              | OsI_29756  | Ia    | 2XWRKYGQK       | 2             | C2H2        |
| WRKY 31     | BGIOGA020376 | 5              | OsI_21017  | II    | WRKYGQK         | 1             | C2H2        |
| WRKY 32     | BGIOGA009118 | 2              | OsI_09096  | II    | WRKYGQK         | 1             | C2H2        |
| WRKY 34     | BGIOGA005924 | 2              | OsI_08301  | II    | WRKYGQK         | 1             | C2H2        |
| WRKY 35     | BGIOGA014906 | 4              | OsI_16268  | Ia    | 2XWRKYGQK       | 2             | C2H2        |
| WRKY 36     | BGIOGA014615 | 4              | OsI_16857  | II    | WRKYGQK         | 1             | C2H2        |
| WRKY 36     | BGIOGA014617 | 4              | OsI_16855  | II    | WRKYGQK         | 1             | C2H2        |
| WRKY 37     | BGIOGA017037 | 4              | OsI_17230  | II    | WRKYGQK         | 1             | C2H2        |
| WRKY 38     | BGIOGA030067 | 9              | OsI_30725  | IV    | WRKYGQK         | 1             | NA          |

|                  |              |    |           |     |           |    |      |
|------------------|--------------|----|-----------|-----|-----------|----|------|
| <b>WRKY 39</b>   | BGIOGA007926 | 2  | OsI_06657 | II  | WRKYGQK   | 1  | C2H2 |
| <b>WRKY 40</b>   | BGIOGA034612 | 11 | OsI_34881 | III | WRKYGQK   | 1  | C2HC |
| <b>WRKY 41</b>   | BGIOGA035677 | 11 | OsI_36961 | III | WRKYGQK   | 1  | C2HC |
| <b>WRKY 42</b>   | BGIOGA008165 | 2  | OsI_07130 | II  | WRKYGQK   | 1  | C2H2 |
| <b>WRKY 43</b>   | BGIOGA018854 | 5  | OsI_18378 | II  | WRKYGQK   | 1  | C2H2 |
| <b>WRKY 44</b>   | BGIOGA021174 | 6  | OsI_23123 | II  | WRKYGQK   | 1  | C2H2 |
| <b>WRKY 45-2</b> | BGIOGA019621 | 5  | OsI_19468 | III | WRKYGQK   | 1  | C2HC |
| <b>WRKY 46</b>   | BGIOGA012525 | 3  | OsI_11354 | III | WRKYGEK   | 1* | C2HC |
| <b>WRKY 46</b>   | BGIOGA034615 | 11 | OsI_34877 | III | WRKYGQK   | 1  | C2HC |
| <b>WRKY 46</b>   | BGIOGA036759 | 11 | OsI_37236 | III | WRKYGEK   | 1* | C2HC |
| <b>WRKY 47</b>   | BGIOGA023706 | 7  | OsI_27350 | III | WRKYGQK   | 1  | C2HC |
| <b>WRKY 48</b>   | BGIOGA030346 | 5  | OsI_30509 | III | WRKYGQK   | 1  | C2HC |
| <b>WRKY 49</b>   | BGIOGA020371 | 5  | OsI_21007 | II  | WRKYGQK   | 1  | C2H2 |
| <b>WRKY 50</b>   | BGIOGA034611 | 11 | OsI_34882 | III | WRKYGQK   | 1  | C2HC |
| <b>WRKY 51</b>   | BGIOGA009380 | 4  | OsI_14454 | II  | WRKYGQK   | 1  | C2H2 |
| <b>WRKY 52</b>   | BGIOGA034616 | 11 | OsI_34876 | III | WRKYGQK   | 1  | C2HC |
| <b>WRKY 52</b>   | BGIOGA036760 | 12 | OsI_37234 | III | WRKYGEK   | 1* | C2HC |
| <b>WRKY 53</b>   | BGIOGA012571 | 3  | OsI_11453 | III | WRKYGQK   | 1  | C2HC |
| <b>WRKY 53</b>   | BGIOGA019646 | 5  | OsI_19532 | Ia  | 2XWRKYGQK | 2  | C2H2 |
| <b>WRKY 54</b>   | BGIOGA017860 | 5  | OsI_20348 | III | WRKYGQK   | 1  | C2HC |
| <b>WRKY 55</b>   | BGIOGA012523 | 3  | OsI_11350 | III | WRKYGEK   | 1* | C2HC |
| <b>WRKY 56</b>   | BGIOGA000506 | 1  | OsI_04396 | II  | WRKYGQK   | 1  | C2H2 |
| <b>WRKY 57</b>   | BGIOGA036823 | 12 | OsI_37118 | Ia  | 2XWRKYGQK | 2  | C2H2 |
| <b>WRKY 57</b>   | BGIOGA036825 | 11 | OsI_37112 | II  | WRKYGQK   | 1  | C2H2 |
| <b>WRKY 58</b>   | BGIOGA017690 | 5  | OsI_20709 | IV  | WRKYGQK   | 1  | NA   |
| <b>WRKY 59</b>   | BGIOGA000921 | 1  | OsI_03498 | II  | WRKYGKK   | 1* | C2H2 |
| <b>WRKY 60</b>   | BGIOGA010118 | 3  | OsI_12866 | II  | WRKYGQK   | 1* | C2H2 |
| <b>WRKY 62</b>   | BGIOGA029757 | 9  | OsI_31380 | II  | WRKYGQK   | 1  | C2H2 |
| <b>WRKY 63</b>   | BGIOGA017861 | 5  | OsI_20347 | III | WRKYGQK   | 1  | C2HC |
| <b>WRKY 64</b>   | BGIOGA036756 | 12 | OsI_37240 | III | WRKYGQK   | 1  | C2HC |
| <b>WRKY 65</b>   | BGIOGA013972 | 3  | OsI_14387 | II  | WRKYGQK   | 1  | C2H2 |
| <b>WRKY 65</b>   | BGIOGA036755 | 12 | OsI_37241 | III | WRKYGQK   | 1  | C2HC |
| <b>WRKY 66</b>   | BGIOGA008866 | 2  | OsI_08576 | II  | WRKYGQK   | 1  | C2H2 |
| <b>WRKY 67</b>   | BGIOGA018676 | 5  | OsI_18730 | II  | WRKYGQK   | 1  | C2H2 |
| <b>WRKY 68</b>   | BGIOGA017063 | 4  | OsI_17287 | II  | WRKYGQK   | 1  | C2H2 |
| <b>WRKY 69</b>   | BGIOGA019117 | 5  | OsI_18309 | II  | WRKYGQK   | 1  | C2H2 |
| <b>WRKY 69</b>   | BGIOGA019119 | 5  | OsI_18313 | II  | WRKYGQK   | 1  | C2H2 |
| <b>WRKY 69</b>   | BGIOGA040489 | 8  | -         | III | WRKYGQK   | 1  | C2HC |
| <b>WRKY 70</b>   | BGIOGA017556 | 5  | OsI_21001 | II  | WRKYGQK   | 1  | C2HC |
| <b>WRKY 70</b>   | BGIOGA017876 | 5  | OsI_20320 | Ia  | 2XWRKYGQK | 2  | C2H2 |
| <b>WRKY 71</b>   | BGIOGA007670 | 2  | OsI_06106 | II  | WRKYGQK   | 1  | C2H2 |
| <b>WRKY 72</b>   | BGIOGA002913 | 1  | OsI_00690 | II  | WRKYGQK   | 1  | C2H2 |
| <b>WRKY 72</b>   | BGIOGA014175 | 4  | OsI_17774 | II  | WRKYGQK   | 1  | C2H2 |
| <b>WRKY 72</b>   | BGIOGA035288 | 11 | OsI_36153 | IV  | WRKYGQK   | 1  | NA   |
| <b>WRKY 72</b>   | BGIOGA035289 | 11 | OsI_36154 | II  | WRKYGQK   | 1  | C2H2 |
| <b>WRKY 73</b>   | BGIOGA022298 | 6  | OsI_21640 | II  | WRKYGQK   | 1  | C2H2 |
| <b>WRKY 74</b>   | BGIOGA030535 | 9  | OsI_30936 | III | WRKYGQK   | 1  | C2HC |
| <b>WRKY 75</b>   | BGIOGA019620 | 5  | OsI_19467 | III | WRKYGQK   | 1  | C2HC |
| <b>WRKY 76</b>   | BGIOGA029758 | 9  | OsI_31379 | II  | WRKYGQK   | 1  | C2H2 |
| <b>WRKY 78</b>   | BGIOGA024007 | 7  | OsI_26641 | Ia  | 2XWRKYGQK | 2  | C2H2 |

|                 |              |    |           |     |           |    |      |
|-----------------|--------------|----|-----------|-----|-----------|----|------|
| <b>WRKY 79</b>  | BGOSGA002245 | 1  | OsI_00664 | II  | WRKYGKK   | 1* | C2H2 |
| <b>WRKY 80</b>  | BGOSGA029574 | 9  | OsI_31794 | II  | WRKYGQK   | 1  | C2H2 |
| <b>WRKY 81</b>  | BGOSGA033569 | 11 | OsI_36959 | Ib  | 2XWRKYGQK | 2  | C2HC |
| <b>WRKY 82</b>  | BGOSGA027300 | 7  | OsI_28563 | Ia  | 2XWRKYGQK | 2  | C2H2 |
| <b>WRKY 89</b>  | BGOSGA034613 | 11 | OsI_34880 | III | WRKYGQK   | 1  | C2HC |
| <b>WRKY 89</b>  | BGOSGA036757 | 12 | OsI_37239 | III | WRKYGQK   | 1  | C2HC |
| <b>WRKY 98</b>  | BGOSGA035675 | 11 | OsI_36957 | III | WRKYGQK   | 1  | C2HC |
| <b>WRKY 99</b>  | BGOSGA003134 | 1  | OsI_01154 | II  | WRKYGQK   | 1  | C2H2 |
| <b>WRKY 100</b> | BGOSGA022355 | 6  | OsI_21753 | III | WRKYGQK   | 1  | C2HC |

(\* represents variation in the domain, numbers in red represents nomenclature found using BLAST results, numbers in green represents duplicated WRKY members)

**Supplementary Table 3.** WRKY TF gene models in *japonica* rice

| Gene symbol | Gene ID          | Chromosome no. | Gene names   | Group | Conserved motif | Domain number | Zinc finger |
|-------------|------------------|----------------|--------------|-------|-----------------|---------------|-------------|
| WRKY 01     | LOC_Os01g14440.1 | 1              | Os01g0246700 | II    | WRKYGQK         | 1             | C2H2        |
| WRKY 02     | LOC_Os10g42850.1 | 10             | Os10g0579400 | II    | WRKYGQK         | 1             | C2H2        |
| WRKY 03     | LOC_Os03g55080.1 | 3              | Os03g0758000 | II    | WRKYGQK         | 1             | C2H2        |
| WRKY 04     | LOC_Os03g55164.1 | 3              | Os03g0758900 | I     | 2XWRKYGQK       | 2             | C2H2        |
| WRKY 05     | LOC_Os05g04640.1 | 5              | Os05g0137500 | II    | WRKYGQK         | 1             | C2H2        |
| WRKY 06     | LOC_Os03g58420.1 | 3              | Os03g0798500 | II    | WRKYGQK         | 1             | C2H2        |
| WRKY 07     | LOC_Os05g46020.1 | 5              | Os05g0537100 | II    | WRKYGKK         | 1*            | C2H2        |
| WRKY 08     | LOC_Os05g50610.1 | 5              | Os05g0583000 | II    | WRKYGQK         | 1             | C2H2        |
| WRKY 08     | LOC_Os05g50610.2 | 5              | Os05g0583000 | II    | WRKYGQK         | 1             | C2H2        |
| WRKY 09     | LOC_Os01g18584.1 | 1              | Os01g0289600 | II    | WRKYGQK         | 1             | C2H2        |
| WRKY 10     | LOC_Os01g09100.1 | 1              | Os01g0186000 | II    | WRKYGKK         | 1*            | C2H2        |
| WRKY 11     | LOC_Os01g43650.1 | 1              | Os01g0626400 | II    | WRKYGQK         | 1             | C2H2        |
| WRKY 12     | LOC_Os01g43550.1 | 1              | Os01g0624700 | II    | WRKYGQK         | 1             | C2H2        |
| WRKY 13     | LOC_Os01g54600.1 | 1              | Os01g0750100 | II    | WRKYGQK         | 1             | C2H2        |
| WRKY 14     | LOC_Os01g53040.1 | 1              | Os01g0730700 | II    | WRKYGQK         | 1             | C2H2        |
| WRKY 15     | LOC_Os01g46800.1 | 1              | Os01g0656400 | II    | WRKYGQK         | 1             | C2HC        |
| WRKY 16     | LOC_Os01g47560.1 | 1              | Os01g0665500 | II    | WRKYGQK         | 1             | C2H2        |
| WRKY 17     | LOC_Os01g74140.1 | 1              | Os01g0972800 | II    | WRKYGQK         | 1             | C2H2        |
| WRKY 18     | LOC_Os10g18099.1 | 10             | -            | III   | WRKYGEK         | 1*            | C2HC        |
| WRKY 19     | LOC_Os05g49620.1 | 5              | Os05g0571200 | III   | WRKYGQK         | 1             | C2HC        |
| WRKY 20     | LOC_Os01g60540.1 | 1              | -            | III   | WRKYGQK         | 1             | C2HC        |
| WRKY 21     | LOC_Os01g60640.1 | 1              | Os01g0821600 | III   | WRKYGQK         | 1             | C2HC        |
| WRKY 22     | LOC_Os01g60490.1 | 1              | Os01g0820400 | III   | WRKYGQK         | 1             | C2HC        |
| WRKY 23     | LOC_Os01g53260.1 | 1              | Os01g0734000 | II    | WRKYGQK         | 1             | C2H2        |
| WRKY 24     | LOC_Os01g61080.1 | 1              | Os01g0826400 | I     | 2XWRKYGQK       | 2             | C2H2        |
| WRKY 25     | LOC_Os08g13840.1 | 8              | Os08g0235800 | II    | WRKYGQK         | 1             | C2H2        |
| WRKY 25     | LOC_Os08g13840.2 | 8              | Os08g0235800 | II    | WRKYGQK         | 1             | C2H2        |
| WRKY 26     | LOC_Os01g51690.1 | 1              | Os01g0714800 | II    | WRKYGKK         | 1*            | C2H2        |
| WRKY 27     | LOC_Os01g40430.1 | 1              | Os01g0586800 | II    | WRKYGQK         | 1             | C2H2        |
| WRKY 28     | LOC_Os06g44010.1 | 6              | Os06g0649000 | II    | WRKYGQK         | 1             | C2H2        |
| WRKY 29     | LOC_Os07g02060.1 | 7              | Os07g0111400 | II    | WRKYGQK         | 1             | C2H2        |
| WRKY 30     | LOC_Os08g38990.1 | 8              | Os08g0499300 | I     | 2XWRKYGQK       | 2             | C2H2        |
| WRKY 31     | LOC_Os06g30860.1 | 6              | Os06g0504900 | II    | WRKYGQK         | 1             | C2H2        |
| WRKY 32     | LOC_Os02g53100.1 | 2              | Os02g0770500 | II    | WRKYGQK         | 1             | C2H2        |
| WRKY 34     | LOC_Os02g43560.1 | 2              | Os02g0652100 | IV    | WRKYGQK         | 1             | -           |
| WRKY 35     | LOC_Os04g39570.1 | 4              | Os04g0471700 | I     | 2XWRKYGQK       | 2             | C2H2        |
| WRKY 36     | LOC_Os04g46060.1 | 4              | Os04g0545000 | II    | WRKYGQK         | 1             | C2H2        |
| WRKY 37     | LOC_Os04g50920.1 | 4              | Os04g0597300 | II    | WRKYGQK         | 1             | C2H2        |
| WRKY 39     | LOC_Os02g16540.1 | 2              | Os02g0265200 | II    | WRKYGQK         | 1             | C2H2        |
| WRKY 42     | LOC_Os11g02530.1 | 11             | Os11g0117500 | III   | WRKYGQK         | 1             | C2HC        |
| WRKY 43     | LOC_Os05g49210.1 | 5              | Os05g0567200 | II    | WRKYGQK         | 1             | C2H2        |
| WRKY 44     | LOC_Os02g26430.1 | 2              | Os02g0462800 | II    | WRKYGQK         | 1             | C2H2        |
| WRKY 45     | LOC_Os05g25770.1 | 5              | Os05g0322900 | III   | WRKYGQK         | 1             | C2HC        |
| WRKY 47     | LOC_Os07g48260.1 | 7              | Os07g0680400 | III   | WRKYGQK         | 1             | C2HC        |
| WRKY 48     | LOC_Os05g40060.1 | 5              | Os05g0478400 | III   | WRKYGQK         | 1             | C2HC        |
| WRKY 49     | LOC_Os05g49100.1 | 5              | Os05g0565900 | II    | WRKYGQK         | 1             | C2H2        |
| WRKY 50     | LOC_Os11g02540.1 | 11             | Os11g0117600 | III   | WRKYGQK         | 1             | C2HC        |
| WRKY 51     | LOC_Os04g21950.1 | 4              | Os04g0287400 | II    | WRKYGQK         | 1             | C2H2        |
| WRKY 52     | LOC_Os11g02470.1 | 11             | Os11g0116600 | III   | WRKYGEK         | 1*            | C2HC        |
| WRKY 53     | LOC_Os05g27730.1 | 5              | Os05g0343400 | I     | 2XWRKYGQK       | 2             | C2H2        |
| WRKY 54     | LOC_Os05g40080.1 | 5              | Os05g0478800 | III   | WRKYGQK         | 1             | C2HC        |

|                 |                  |    |              |     |           |    |      |
|-----------------|------------------|----|--------------|-----|-----------|----|------|
| <b>WRKY 55</b>  | LOC_Os03g20550.1 | 3  | Os03g0321700 | III | WRKYGEK   | 1* | C2HC |
| <b>WRKY 56</b>  | LOC_Os01g62514.1 | 1  | Os01g0842801 | IV  | WRKYGQK   | 1  | -    |
| <b>WRKY 57</b>  | LOC_Os12g01180.1 | 12 | Os12g0102300 | II  | WRKYGQK   | 1  | C2H2 |
| <b>WRKY 58</b>  | LOC_Os05g45230.1 | 5  | Os05g0528500 | IV  | WRKYGQK   | 1  | -    |
| <b>WRKY 60</b>  | LOC_Os03g45450.1 | 3  | Os03g0657400 | II  | WRKYGQK   | 1  | C2H2 |
| <b>WRKY 61</b>  | LOC_Os11g45850.1 | 11 | Os11g0685700 | III | WKKYGQK   | 1* | C2HC |
| <b>WRKY 62</b>  | LOC_Os09g25070.1 | 9  | Os09g0417800 | II  | WRKYGQK   | 1  | C2H2 |
| <b>WRKY 63</b>  | LOC_Os11g45920.1 | 11 | Os11g0686250 | III | WRKYGQK   | 1  | C2HC |
| <b>WRKY 64</b>  | LOC_Os12g02450.1 | 12 | Os12g0116700 | III | 2XWRKYGQK | 2  | C2HC |
| <b>WRKY 65</b>  | LOC_Os12g02470.1 | 12 | Os12g0116800 | III | WRKYGQK   | 1  | C2HC |
| <b>WRKY 66</b>  | LOC_Os02g47060.1 | 2  | Os02g0698800 | II  | WRKYGQK   | 1  | C2H2 |
| <b>WRKY 67</b>  | LOC_Os05g09020.1 | 5  | Os05g0183100 | II  | WRKYGKK   | 1* | C2H2 |
| <b>WRKY 68</b>  | LOC_Os04g51560.1 | 4  | Os04g0605100 | II  | WRKYGQK   | 1  | C2H2 |
| <b>WRKY 69</b>  | LOC_Os08g29660.1 | 8  | Os08g0386200 | III | WRKYGQK   | 1  | C2HC |
| <b>WRKY 70</b>  | LOC_Os05g39720.1 | 5  | Os05g0474800 | II  | WRKYGQK   | 1  | C2H2 |
| <b>WRKY 71</b>  | LOC_Os02g08440.1 | 2  | Os02g0181300 | II  | WRKYGQK   | 1  | C2H2 |
| <b>WRKY 72</b>  | LOC_Os11g29870.1 | 11 | Os11g0490900 | II  | WRKYGQK   | 1  | C2H2 |
| <b>WRKY 73</b>  | LOC_Os06g05380.1 | 6  | Os06g0146250 | II  | WRKYGQK   | 1  | C2H2 |
| <b>WRKY 74</b>  | LOC_Os09g16510.1 | 9  | Os09g0334500 | III | WRKYGQK   | 1  | C2HC |
| <b>WRKY 76</b>  | LOC_Os09g25060.1 | 9  | Os09g0417600 | II  | WRKYGQK   | 1  | C2H2 |
| <b>WRKY 77</b>  | LOC_Os01g40260.1 | 1  | Os01g0584900 | II  | WRKYGKK   | 1* | C2H2 |
| <b>WRKY 79</b>  | LOC_Os03g21710.1 | 3  | Os03g0335200 | III | WRKYGQK   | 1  | C2HC |
| <b>WRKY 80</b>  | LOC_Os03g63810.1 | 3  | Os03g0855100 | II  | WRKYGQK   | 1  | C2H2 |
| <b>WRKY 81</b>  | LOC_Os03g33012.1 | 3  | Os03g0444900 | I   | 2XWRKYGQK | 2  | C2H2 |
| <b>WRKY 82</b>  | LOC_Os05g14370.1 | 5  | Os05g0233100 | III | WRKYGQK   | 1  | C2HC |
| <b>WRKY 84</b>  | LOC_Os05g40070.1 | 5  | Os05g0478700 | III | WRKYGEK   | 1* | C2HC |
| <b>WRKY 87</b>  | LOC_Os07g39480.1 | 7  | Os07g0583700 | II  | 2XWRKYGQK | 2  | C2H2 |
| <b>WRKY 88</b>  | LOC_Os07g40570.1 | 7  | Os07g0596900 | II  | 2XWRKYGQK | 2  | C2H2 |
| <b>WRKY 89</b>  | LOC_Os08g17400.1 | 8  | Os08g0235800 | II  | 2XWRKYGQK | 2  | C2H2 |
| <b>WRKY 90</b>  | LOC_Os09g30400.1 | 9  | Os09g0481700 | II  | WRKYGQK   | 1  | C2H2 |
| <b>WRKY 94</b>  | LOC_Os12g40570.1 | 12 | Os12g0597700 | IV  | WRKYGQK   | 1  | -    |
| <b>WRKY 95</b>  | LOC_Os12g02400.1 | 12 | -            | III | WRKYGQK   | 1  | C2HC |
| <b>WRKY 96</b>  | LOC_Os12g32250.1 | 12 | Os12g0507300 | II  | WRKYGQK   | 1  | C2H2 |
| <b>WRKY 97</b>  | LOC_Os12g02420.1 | 12 | Os12g0116400 | III | WRKYGQK   | 1  | C2HC |
| <b>WRKY 102</b> | LOC_Os01g08710.1 | 1  | Os01g0182700 | II  | WRKYGQK   | 1  | C2H2 |
| <b>WRKY 104</b> | LOC_Os11g02520.1 | 11 | Os11g0117400 | III | WRKYGQK   | 1  | C2HC |
| <b>WRKY 105</b> | LOC_Os08g09800.1 | 8  | Os08g0198000 | II  | WRMCGQK   | 1* | C2H2 |
| <b>WRKY 106</b> | LOC_Os08g09810.1 | 8  | Os08g0198100 | II  | WRMCGQK   | 1* | C2H2 |
| <b>WRKY 107</b> | LOC_Os01g09080.1 | 1  | Os01g0185900 | II  | WRKYGQK   | 1  | C2H2 |
| <b>WRKY 108</b> | LOC_Os01g60600.1 | 1  | Os01g0821300 | II  | WRKYGQK   | 1  | C2H2 |
| <b>WRKY 109</b> | LOC_Os05g03900.1 | 5  | Os05g0129800 | II  | WRKYGQK   | 1  | C2H2 |
| <b>WRKY 111</b> | LOC_Os05g50700.1 | 5  | -            | II  | WRKYGQK   | 1  | C2H2 |
| <b>WRKY 112</b> | LOC_Os09g09630.1 | 9  | Os08g0499300 | III | WRKYGQK   | 1  | C2HC |
| <b>WRKY 113</b> | LOC_Os06g06360.1 | 6  | Os06g0158100 | III | WRKYGQK   | 1  | C2HC |
| <b>WRKY 114</b> | LOC_Os12g02440.1 | 12 | Os12g0116600 | III | WRKYGQK   | 1  | C2HC |
| <b>WRKY 115</b> | LOC_Os07g27670.1 | 7  | -            | III | WRKYGQK   | 1  | C2HC |
| <b>WRKY 116</b> | LOC_Os01g60520.1 | 1  | Os01g0820700 | III | WRKYGQK   | 1  | C2HC |
| <b>WRKY 117</b> | LOC_Os08g09840.1 | 8  | Os08g0198400 | II  | WRMCGQK   | 1* | C2H2 |
| <b>WRKY 118</b> | LOC_Os08g09900.1 | 8  | Os08g0198900 | II  | WRMCGQK   | 1* | C2H2 |
| <b>WRKY 121</b> | LOC_Os03g53050.1 | 3  | Os03g0741400 | II  | WRKYGQK   | 1  | C2H2 |

(\* represents variation in the domain). Numbers in red represents annotations according to the nomenclature given by Rice WRKY Working Group, numbers in green represents duplicated WRKY members

**Supplementary Table 4.** Motif composition of WRKY protein sequences of *indica* rice

| <b>Sequence</b>                                    | <b>Width</b> | <b>Relative entropy</b> | <b>Bayes threshold</b> |
|----------------------------------------------------|--------------|-------------------------|------------------------|
| DGYRWRKYGQKVVKGNPYPRSYKCT                          | 26           | 90                      | 10.7279                |
| YRWRKYGQKAVKNNKFPRSYRCTHQGCN                       | 29           | 87.6                    | 11.5047                |
| VRKHVERASHDPKSVITTYEGKHNHEVPA                      | 29           | 79.8                    | 11.1915                |
| VQRTDDASLFDVVYHGEHTC                               | 21           | 47.2                    | 9.61962                |
| PRFCFQTRSEVDVLD                                    | 15           | 46.3                    | 10.3091                |
| DGYQWRKYGQKQIEGAMYPRS                              | 21           | 62.1                    | 10.3709                |
| ERSLDGQITEIVYKGTHNHAK                              | 21           | 66.9                    | 11.2771                |
| GRCHCSKRRKNRVKRTIRVPA                              | 21           | 62.6                    | 12.1549                |
| ELGRMNEENQRLRGMLTQVTTSYQALQMH                      | 29           | 75.1                    | 12.123                 |
| KSKVWEEFKAVLIDGKVQSAICNHCKNCLVGETTKGTSHLRRHLKSCPAK | 50           | 184.4                   | 13.1405                |
| LVATNDAGLENKLEGCDQAIGSDAVVEALRGGCHCLDGFRNGNEISDCKK | 50           | 210.1                   | 13.2145                |
| GCMATK                                             | 6            | 19.9                    | 10.2718                |
| GGGGGA                                             | 6            | 17.5                    | 10.1623                |
| VVETMTAAITRDPNFTTAVAAALSSIM                        | 27           | 77                      | 10.4692                |
| ALREIARGQSLVTQLRAIVL                               | 20           | 41.6                    | 11.2097                |

Each motif boxes identified in WRKY proteins sequences of *indica* rice.

**Supplementary Table 5.** Motif composition of WRKY protein sequences of *japonica* rice

| Sequence                                              | Width | Relative entropy | Bayes threshold |
|-------------------------------------------------------|-------|------------------|-----------------|
| DDGYRWRKYGQKVVK                                       | 15    | 50.4             | 9.85862         |
| GCPARKHVERCVDDPAMLIVTYEGEHN                           | 27    | 37.7             | 8.59115         |
| NSPYPRSYRC                                            | 11    | 35.4             | 9.91431         |
| ASRAIREPRVVVQTTSEVDIL                                 | 21    | 55.8             | 10.4495         |
| QQKDTNDPPLFSVTYFNHHTC                                 | 21    | 45               | 10.3246         |
| GYNWRKYGQKQVKGSENPRSYKCTFPNC                          | 29    | 114.8            | 12.4013         |
| NLCMVQNMPEYLIDFELERAFEFIVNSPLGSEHWTFDDSSIRCEHSPICIWG* | 50    | 228.5            | 14.0069         |
| RTGFGVLKIDTSRVGYSTPIRSPVTIPPGVSPRELLESPVFLPNAIAQPS    | 50    | 190.4            | 8.70676         |
| LPSPSPRTLMSFLNEEFSSGPFSDIFCDNGSNKHQDGLGKSKAFIDSSR     | 50    | 187.6            | 11.5572         |
| MHSNVKPSIPKKTEDETRHRVFFFQILGSKPPTCPVAEKGFVNHQNN       | 50    | 185.6            | 13.1837         |
| LTKLSASLTTTEHAEKSVMDKQEAVDISSTLSNEEDDRVTH             | 41    | 150              | 12.4595         |
| VTDNHQELSLQSSSTA AKDFTSATIVKPKTSDSMLDNDHHPSPANDQEEN   | 50    | 177.9            | 12.4217         |
| GIANPYVVDTAHHSMEPINQNECNSTLEHEAHEVQDERFE              | 41    | 177.3            | 13.3527         |
| YGSAGHRPAEQFGAAAAGFSFGMLPRSIATPAPSPAIAVPA             | 41    | 122.4            | 9.69352         |
| TNKLTLNVGGKRKGDKHIMDNHNLEEEAKESVSKRRKNAEHTGSTVAQAP    | 50    | 159.4            | 8.70676         |

Each motif boxes identified in WRKY proteins sequences of *japonica* rice.



**Supplementary Table 6.** WRKYTF network involved in rice disease resistance

| <b>RGAP7.0 Locus<br/>(RAP-DB Locus)</b> | <b>Paralogs</b> | <b>Gene descriptions</b>                              | <b><i>Oryza sativa</i> Gramene GO<br/>biological process</b>                                                                                                                                                                                                                                                                                                                                                                                                                                                    | <b>Connected<br/>guide WRKY<br/>gene</b>                           |
|-----------------------------------------|-----------------|-------------------------------------------------------|-----------------------------------------------------------------------------------------------------------------------------------------------------------------------------------------------------------------------------------------------------------------------------------------------------------------------------------------------------------------------------------------------------------------------------------------------------------------------------------------------------------------|--------------------------------------------------------------------|
| <i>LOC_Os04g58810</i><br>(Os04g0684900) | No Paralog      | CCR4 associated factor 1B (OsCAF1B)                   | Nuclear-transcribed mRNA poly(A) tail shortening; defense response to insect; defense response to bacterium; response to wounding                                                                                                                                                                                                                                                                                                                                                                               | WRKY01<br>WRKY15<br>WRKY21<br>WRKY71<br>WRKY12<br>WRKY28           |
| <i>LOC_Os09g34250</i><br>(Os09g0518200) | No Paralog      | Salicylic acid glucotransferase (OsSGT)               | Metabolic process; salicylic acid metabolic process; shoot morphogenesis; benzoate metabolic process; glucosinolate biosynthetic process; cellular response to water deprivation; defense response to bacterium; para-aminobenzoic acid metabolic process; callose deposition in cell wall during defense response; cellular response to hydrogen peroxide; cellular response to abscisic acid stimulus; cellular hyperosmotic salinity response; indolebutyric acid metabolic process; auxin metabolic process | WRKY11<br>WRKY21<br>WRKY51<br>WRKY45<br>WRKY48<br>WRKY54<br>WRKY08 |
| <i>LOC_Os03g64260</i><br>(Os03g0860100) | No Paralog      | Ethylene-responsive transcription factor 83 (OsERF83) | Transcription, DNA-dependent; regulation of transcription, DNA-dependent; response to chitin                                                                                                                                                                                                                                                                                                                                                                                                                    | WRKY11<br>WRKY21<br>WRKY45<br>WRKY48<br>WRKY54<br>WRKY08           |
| <i>LOC_Os04g48850</i><br>(Os04g0578000) | No Paralog      | Ethylene biosynthesis ACC synthase 2                  | Induction of apoptosis by oxidative stress; biosynthetic process; response to external stimulus; response to wounding; response to mechanical stimulus; response to ethylene stimulus; response to auxin stimulus; response to jasmonic acid stimulus; cellular response to iron ion; response to oxidative stress                                                                                                                                                                                              | WRKY24<br>WRKY71<br>WRKY53<br>WRKY28                               |
| <i>LOC_Os03g50280</i><br>(Os03g0710700) | No Paralog      | GLTP domain containing protein                        | Respiratory burst during defense response; protein targeting to membrane; ER-nuclear signaling pathway; salicylic acid biosynthetic process; response to ethylene stimulus; abscisic acid                                                                                                                                                                                                                                                                                                                       | WRKY01<br>WRKY24<br>WRKY71<br>WRKY51<br>WRKY48<br>WRKY54           |

|                                  |                |                                    |  |                                                                                                                                                                                                                                                                                                                                                                                                                                                                                                                |                                                |
|----------------------------------|----------------|------------------------------------|--|----------------------------------------------------------------------------------------------------------------------------------------------------------------------------------------------------------------------------------------------------------------------------------------------------------------------------------------------------------------------------------------------------------------------------------------------------------------------------------------------------------------|------------------------------------------------|
|                                  |                |                                    |  | mediated signaling pathway; salicylic acid mediated signaling pathway; jasmonic acid mediated signaling pathway; response to chitin; heat acclimation; regulation of plant-type hypersensitive response; endoplasmic reticulum unfolded protein response; negative regulation of defense response; response to endoplasmic reticulum stress; innate immune response; glycolipid transport; defense response to fungus; callose deposition during defense response                                              |                                                |
| LOC_Os01g63690<br>(Os01g0855600) | No Paralog     | Hs lpro-1 protein                  |  | Response to oxidative stress; response to salicylic acid stimulus; defense response to bacterium, incompatible interaction                                                                                                                                                                                                                                                                                                                                                                                     | WRKY11<br>WRKY71<br>WRKY53<br>WRKY08<br>WRKY28 |
| LOC_Os08g33940<br>(Os08g0437300) | LOC_Os09g24800 | Typical P-type R2R3 MYB protein    |  | Response to salicylic acid stimulus; response to gibberellin stimulus; response to chitin                                                                                                                                                                                                                                                                                                                                                                                                                      | WRKY21<br>WRKY51<br>WRKY48<br>WRKY54           |
| LOC_Os03g57310<br>(Os03g0787000) | No paralog     | PSY1 homolog, syntaxin             |  | Intracellular protein transport; vesicle-mediated transport; negative regulation of cellular defense response; transpiration; regulation of stomatal movement; salicylic acid mediated signaling pathway; negative regulation of defense response; jasmonic acid mediated signaling pathway; negative regulation of programmed cell death; defense response to fungus; response to fungus; regulation of plant-type hypersensitive response; protein targeting to membrane; response to abscisic acid stimulus | WRKY21<br>WRKY71<br>WRKY53<br>WRKY28           |
| LOC_Os11g47460<br>(Os11g0700500) | LOC_Os12g37970 | Snapdragon MYB protein 305 homolog |  | Transcription, DNA-dependent; regulation of transcription, DNA-dependent; response to salicylic acid stimulus; response to gibberellin stimulus; response to ethylene stimulus; response to chitin; response to jasmonic acid stimulus; response to cadmium ion                                                                                                                                                                                                                                                | WRKY121<br>WRKY51<br>WRKY94                    |

|                                  |            |                                           |                                                                                                                                                                                                                                                                                                                                                                                                                                                                                                                                                                                                                                                                                                                                                                                  |                                             |
|----------------------------------|------------|-------------------------------------------|----------------------------------------------------------------------------------------------------------------------------------------------------------------------------------------------------------------------------------------------------------------------------------------------------------------------------------------------------------------------------------------------------------------------------------------------------------------------------------------------------------------------------------------------------------------------------------------------------------------------------------------------------------------------------------------------------------------------------------------------------------------------------------|---------------------------------------------|
| LOC_Os09g21710<br>(Os09g0385700) | No paralog | Stress associated protein gene 17 (SAP17) | Protein targeting to membrane; response to stress; signal transduction; toxin catabolic process; response to water deprivation; response to wounding; response to ethylene stimulus; response to auxin stimulus; response to abscisic acid stimulus; abscisic acid mediated signaling pathway; response to jasmonic acid stimulus; salicylic acid mediated signaling pathway; jasmonic acid mediated signaling pathway; response to chitin; heat acclimation; regulation of plant-type hypersensitive response; response to cyclopentenone; hyperosmotic salinity response                                                                                                                                                                                                       | WRKY11<br>WRKY21<br>WRKY8                   |
| LOC_Os06g41770<br>(Os06g0622700) | No paralog | bZIP50                                    | MAPKKK cascade; respiratory burst during defense response; regulation of transcription, DNA-dependent; protein targeting to membrane; ER-nuclear signaling pathway; cell communication; response to cold; response to xenobiotic stimulus; ethylene biosynthetic process; abscisic acid mediated signaling pathway; systemic acquired resistance, salicylic acid mediated signaling pathway; jasmonic acid mediated signaling pathway; ethylene mediated signaling pathway; heat acclimation; regulation of plant-type hypersensitive response; negative regulation of defense response; response to endoplasmic reticulum stress; negative regulation of programmed cell death; defense response to fungus; response to chitin; endoplasmic reticulum unfolded protein response | WRKY15<br>WRKY71<br>WRKY53<br>WRKY113       |
| LOC_Os02g13960<br>(Os02g0234300) | No paralog | Plant U-box-containing protein 4 (OsPUB4) | Plant-type hypersensitive response; defense response, incompatible interaction; defense response to fungus, incompatible interaction;                                                                                                                                                                                                                                                                                                                                                                                                                                                                                                                                                                                                                                            | WRKY53<br>Peptidase C48<br>WRKY57<br>WRKY57 |

|                                  |                |                                           | protein ubiquitination                                                                                                                                                                                                                                                                                                                                                                                                                                                                                                                                |                                                             |
|----------------------------------|----------------|-------------------------------------------|-------------------------------------------------------------------------------------------------------------------------------------------------------------------------------------------------------------------------------------------------------------------------------------------------------------------------------------------------------------------------------------------------------------------------------------------------------------------------------------------------------------------------------------------------------|-------------------------------------------------------------|
| LOC_Os10g42690<br>(Os10g0577600) | LOC_Os02g46930 | Jumonji 706                               | Response to chitin                                                                                                                                                                                                                                                                                                                                                                                                                                                                                                                                    | WRKY71<br>WRKY45<br>WRKY53                                  |
| LOC_Os03g18150<br>(Os03g0292100) | No paralog     | Protein phosphatase 2C32 (OsPP2C32)       | Protein amino acid dephosphorylation; abscisic acid mediated signaling pathway; defense response to fungus; response to fungus; response to wounding; stomatal lineage progression                                                                                                                                                                                                                                                                                                                                                                    | WRKY21<br>WRKY53                                            |
| LOC_Os04g32480<br>(Os04g0395800) | No paralog     | Tify gene 9                               | Signal transduction; response to water deprivation; response to fungus; jasmonic acid biosynthetic process; response to ethylene stimulus; response to auxin stimulus; abscisic acid mediated signaling pathway; jasmonic acid mediated signaling pathway; hyperosmotic salinity response; regulation of systemic acquired resistance; response to jasmonic acid stimulus; response to wounding                                                                                                                                                       | WRKY13<br>WRKY71<br>WRKY28                                  |
| LOC_Os05g50890<br>(Os05g0586200) | No paralog     | Jasmonyl-l-isoleucine synthase 1 (OsJAR1) | Red, far-red light phototransduction; response to wounding; systemic acquired resistance; photomorphogenesis; jasmonic acid metabolic process; response to auxin stimulus; response to jasmonic acid stimulus; jasmonic acid and ethylene-dependent systemic resistance; induced systemic resistance, jasmonic acid mediated signaling pathway; response to mycotoxin; regulation of stomatal movement; response to ozone; response to UV-B; negative regulation of defense response; response to light stimulus; cellular response to auxin stimulus | WRKY104<br>WRKY95                                           |
| LOC_Os01g74250<br>(Os01g0973600) | No paralog     | Protein of unknown function DUF506        | Respiratory burst during defense response; response to wounding; response to mechanical stimulus; ethylene biosynthetic process; response to chitin;                                                                                                                                                                                                                                                                                                                                                                                                  | WRKY71<br>WRKY53<br>Cytochrome b5 domain containing protein |

|                                               |            |                                                           |                                                                                                                                                                                                                                                                                                                                                                                                                       |                                                   |
|-----------------------------------------------|------------|-----------------------------------------------------------|-----------------------------------------------------------------------------------------------------------------------------------------------------------------------------------------------------------------------------------------------------------------------------------------------------------------------------------------------------------------------------------------------------------------------|---------------------------------------------------|
|                                               |            |                                                           | endoplasmic reticulum unfolded protein response; callose deposition during defense response                                                                                                                                                                                                                                                                                                                           |                                                   |
| LOC_Os02g32590<br>(Os02g0527300)              | No paralog | Heat stress TF a3<br>(OsHSfA3)                            | Regulation of transcription, DNA-dependent; response to heat; transcription, DNA-dependent; response to stress; response to chitin                                                                                                                                                                                                                                                                                    | WRKY71<br>Cytochrome b5 domain containing protein |
| LOC_Os10g39770<br>(Os10g0544600)              | No paralog | Zinc finger, RING/FYVE/PHD-type domain containing protein | mRNA transcription; response to light stimulus; response to chitin                                                                                                                                                                                                                                                                                                                                                    | WRKY71<br>WRKY53                                  |
| LOC_Os02g53320<br>(Os02g0773200)              | No paralog | UspA domain containing protein                            | Response to molecule of fungal origin; response to stress                                                                                                                                                                                                                                                                                                                                                             | WRKY71<br>WRKY28                                  |
| LOC_Os03g12500<br>(Os03g0225900)              | No paralog | Allene oxide synthase 2<br>(OsAOS2)                       | Oxidation reduction; response to wounding; response to fungus; response to jasmonic acid stimulus; oxylipin metabolic process; lipid metabolic process; fatty acid metabolic process; fatty acid biosynthetic process; oxylipin biosynthetic process                                                                                                                                                                  | WRKY14<br>WRKY72                                  |
| LOC_Os08g44830<br>(Os08g0562300)              | No paralog | Zinc finger, C2H2-type domain                             | Response to chitin                                                                                                                                                                                                                                                                                                                                                                                                    | WRKY73                                            |
| LOC_Os08g34800<br>(Os08g0448100)              | No paralog | Conserved hypothetical protein                            | Response to chitin; cellular response to hypoxia                                                                                                                                                                                                                                                                                                                                                                      | WRKY71<br>WRKY53                                  |
| LOC_Os06g51390<br>(Os06g0730300)              | No paralog | Protein of unknown function DUF829                        | Protein targeting to membrane; response to water deprivation; response to wounding; response to fungus; jasmonic acid biosynthetic process; response to jasmonic acid stimulus; salicylic acid mediated signaling pathway; jasmonic acid mediated signaling pathway; response to chitin; regulation of plant-type hypersensitive response; hyperosmotic salinity response; callose deposition during defense response | WRKY71<br>WRKY28                                  |
| LOC_Os03g32314<br>(Os03g0438100,Os03g0438200) | No paralog | Allene oxide cyclase<br>(OsAOC)                           | Response to desiccation; response to cold; response to fungus; response to salt stress                                                                                                                                                                                                                                                                                                                                | WRKY71<br>WRKY28                                  |
| LOC_Os02g58080<br>(Os02g0827200)              | No paralog | Sucrose transporter 4 (OsSUT4)                            | Sucrose metabolic process; transport; carbohydrate transport; response to wounding; response to fungus; jasmonic acid biosynthetic process; response to jasmonic acid                                                                                                                                                                                                                                                 | WRKY94                                            |

|                                  |                |                                                            |                                                                                                                                                                                                                                                                                                                                                         |         |
|----------------------------------|----------------|------------------------------------------------------------|---------------------------------------------------------------------------------------------------------------------------------------------------------------------------------------------------------------------------------------------------------------------------------------------------------------------------------------------------------|---------|
|                                  |                |                                                            | stimulus; response to chitin; sucrose transport; carbohydrate transmembrane transport; transmembrane transport                                                                                                                                                                                                                                          |         |
| LOC_Os09g01960<br>(Os09g0106700) | No paralog     | MYB protooncogene protein (R2R3-MYB)                       | Response to stress; response to water deprivation; response to salt stress; response to ethylene stimulus; response to auxin stimulus; response to abscisic acid stimulus; response to gibberellin stimulus; response to salicylic acid stimulus; response to jasmonic acid stimulus; response to chitin; response to cadmium ion                       | WRKY51  |
| LOC_Os05g50710<br>(Os05g0584200) | LOC_Os01g43530 | Late embryogenesis abundant protein 8 (OsLEA8)             | Response to desiccation; response to wounding; response to high light intensity; defense response to fungus                                                                                                                                                                                                                                             | WRKY1   |
| LOC_Os03g58580<br>(Os03g0800000) | LOC_Os07g09010 | Nitrate and chloride transporter                           | Defense response to fungus                                                                                                                                                                                                                                                                                                                              | WRKY1   |
| LOC_Os05g39930<br>(Os05g0476700) | LOC_Os01g60860 | Plant U-box-containing protein 2 (OsPUB2)                  | Protein ubiquitination; response to chitin                                                                                                                                                                                                                                                                                                              | WRKY121 |
| LOC_Os06g12120<br>(Os06g0225300) | LOC_Os04g38480 | Somatic embryogenesis receptor-like kinase 3 (OsSERK3)     | Protein amino acid phosphorylation; phosphorylation; negative regulation of cell death; leaf senescence; cell death; brassinosteroid mediated signaling pathway; response to chitin                                                                                                                                                                     | WRKY24  |
| LOC_Os10g31820<br>(Os10g0456500) | No paralog     | Glutamine synthetase                                       | Respiratory burst during defense response; glutamine biosynthetic process; tryptophan catabolic process; nitrogen compound metabolic process; metabolic process; nitrogen fixation; indoleacetic acid biosynthetic process; response to abscisic acid stimulus; response to chitin; lateral root formation; root cap development; response to bacterium | WRKY55  |
| LOC_Os11g35330<br>(Os11g0557500) | No paralog     | LysM-type receptor-like kinase6 and 7 (OsLysM-RLK7, OsLYK) | Protein amino acid phosphorylation; cell wall macromolecule catabolic process; innate immune response; phosphorylation; cellular response to chitin; cellular response to molecule                                                                                                                                                                      | WRKY1   |

|                                  |                                  |                                                               | of bacterial origin                                                                                                                                                                                                                                                                                                                                                  |        |
|----------------------------------|----------------------------------|---------------------------------------------------------------|----------------------------------------------------------------------------------------------------------------------------------------------------------------------------------------------------------------------------------------------------------------------------------------------------------------------------------------------------------------------|--------|
| LOC_Os01g71670<br>(Os01g0944700) | No paralog                       | $\beta$ -1, 3-glucanase<br>(OsGLN2)                           | Carbohydrate metabolic process; metabolic process; response to cold; response to bacterium; response to salt stress; defense response to fungus, incompatible interaction                                                                                                                                                                                            | WRKY53 |
| LOC_Os09g27750<br>(Os09g0451000) | LOC_Os02g53180                   | Aminocyclopropane<br>-1-carboxylic acid<br>oxidase 1 (OsACO1) | Response to fungus; response to salt stress; ethylene biosynthetic process; detection of ethylene stimulus; oxidation reduction; positive regulation of seed germination; cellular response to fatty acid; cellular response to iron ion                                                                                                                             | WRKY83 |
| LOC_Os03g55800<br>(Os03g0767000) | No paralog                       | Allene oxide<br>synthase 1                                    | Response to wounding; response to fungus; response to jasmonic acid stimulus; oxylipin metabolic process; oxidation reduction; lipid metabolic process; Fatty acid metabolic process; fatty acid biosynthetic process; oxylipin biosynthetic process                                                                                                                 | WRKY28 |
| LOC_Os03g04060<br>(Os03g0132900) | LOC_Os10g39680<br>LOC_Os06g51050 | Pathogenesis related<br>(PR)-3 chitinase 11                   | Polysaccharide catabolic process; carbohydrate metabolic process; chitin catabolic process; metabolic process; cell wall macromolecule catabolic process                                                                                                                                                                                                             | WRKY47 |
| LOC_Os01g66120<br>(Os01g0884300) | LOC_Os05g34830                   | OsNAC6                                                        | Regulation of transcription, DNA-dependent; response to wounding; negative regulation of abscisic acid mediated signaling pathway; transcription, DNA-dependent; regulation of cell size; response to salicylic acid stimulus; response to light stimulus; response to fungus; response to jasmonic acid stimulus; response to sucrose stimulus; response to hypoxia | WRKY53 |
| LOC_Os04g37430<br>(Os04g0447100) | No paralog                       | Lipoxygenase 6<br>(OsLOX6)                                    | Pollen development; response to fungus; anther dehiscence; anther development; oxidation reduction; stamen filament development; lipid metabolic process; fatty acid metabolic process; fatty acid                                                                                                                                                                   | WRKY53 |

|                                  |                                  |                                                     |   |                                                                                                                                                                                                                                                                                                                                                                                                                                                     |        |
|----------------------------------|----------------------------------|-----------------------------------------------------|---|-----------------------------------------------------------------------------------------------------------------------------------------------------------------------------------------------------------------------------------------------------------------------------------------------------------------------------------------------------------------------------------------------------------------------------------------------------|--------|
|                                  |                                  |                                                     |   | biosynthetic process; oxylipin biosynthetic process                                                                                                                                                                                                                                                                                                                                                                                                 |        |
| LOC_Os10g42430<br>(Os10g0575000) | No paralog                       | OsMYC2                                              |   | Regulation of transcription from RNA polymerase II promoter in response to oxidative stress; response to desiccation; regulation of transcription factor activity; response to chitin; positive regulation of flavonoid biosynthetic process; response to jasmonic acid stimulus; response to wounding; positive regulation of transcription, DNA-dependent; response to abscisic acid stimulus; anthocyanin biosynthetic process; defense response | WRKY71 |
| LOC_Os02g47470<br>(Os02g0703600) | No paralog                       | Abscisic acid 8'-hydroxylase<br>(OsABA8OX1)         | 1 | Response to stress; abscisic acid catabolic process; oxidation reduction; release of seed from dormancy; abscisic acid metabolic process; response to red or far red light; defense response to fungus; response to water deprivation                                                                                                                                                                                                               | WRKY51 |
| LOC_Os01g16890<br>(Os01g0276000) | LOC_Os01g59730<br>LOC_Os05g41110 | 60S ribosomal protein L30                           |   | Translation; response to fungus                                                                                                                                                                                                                                                                                                                                                                                                                     | WRKY55 |
| LOC_Os03g60710<br>(Os03g0821900) | LOC_Os03g16740<br>LOC_Os05g02020 | Receptor-like cytoplasmic kinase 118<br>(OsRLCK118) |   | Protein amino acid phosphorylation; response to fungus; phosphorylation; protein amino acid autophosphorylation; defense response to fungus                                                                                                                                                                                                                                                                                                         | WRKY16 |
| Loc_os06g51070<br>(Os06g0726300) | No paralog                       | OsNAC95                                             |   | Regulation of transcription, DNA-dependent; inflorescence morphogenesis; negative regulation of cell size; response to chitin; leaf morphogenesis                                                                                                                                                                                                                                                                                                   | WRKY47 |
| LOC_Os04g43440<br>(Os04g0514600) | No paralog                       | NBS-LRR type disease resistance protein O2          |   | MAPKKK cascade; protein targeting to membrane; defense response; detection of biotic stimulus; response to bacterium; plant-type hypersensitive response; salicylic acid biosynthetic process; systemic acquired resistance, salicylic acid mediated signaling pathway; salicylic acid mediated signaling pathway; jasmonic acid mediated signaling                                                                                                 | WRKY74 |



|                                  |                                  |                                             |   |                                                                                                                                                                                                                                                                                                                                                                                                                                                                                                                            |                            |
|----------------------------------|----------------------------------|---------------------------------------------|---|----------------------------------------------------------------------------------------------------------------------------------------------------------------------------------------------------------------------------------------------------------------------------------------------------------------------------------------------------------------------------------------------------------------------------------------------------------------------------------------------------------------------------|----------------------------|
|                                  |                                  |                                             |   | pathway; positive regulation of flavonoid biosynthetic process; response to chitin; regulation of hydrogen peroxide metabolic process; regulation of plant-type hypersensitive response; detection of bacterium; regulation of defense response; negative regulation of defense response; defense response to bacterium; negative regulation of programmed cell death; regulation of multi-organism process; innate immune response; regulation of immune response; defense response to fungus; response to other organism |                            |
| LOC_Os11G06420<br>(Os11G0163600) | LOC_Os01G64700<br>LOC_Os04G59130 | Tubby-like protein 6<br>and 13              |   | Response to fungus                                                                                                                                                                                                                                                                                                                                                                                                                                                                                                         | WRKY 94                    |
| LOC_Os11g35400<br>(Os11g0558300) | No paralog                       | Acyl CoA<br>synthetase                      |   | Metabolic process; long-chain fatty acid metabolic process; defense response to insect; fatty acid metabolic process; fatty acid biosynthetic process; wax biosynthetic process; cutin biosynthetic process; lateral root formation; defense response to fungus                                                                                                                                                                                                                                                            | WRKY55                     |
| LOC_Os02g47650<br>(Os02g0705400) | No paralog                       | Pathogen induced<br>protein 2-4             |   | Response to molecule of fungal origin; response to stress; response to desiccation; cellular response to phosphate starvation; galactolipid biosynthetic process; cellular response to water deprivation                                                                                                                                                                                                                                                                                                                   | WRKY14                     |
| LOC_Os12g36860<br>(Os12g0555300) | No paralog                       | Pathogenesis-related<br>gene 10<br>(OsPR10) |   | Defense response; response to biotic stimulus                                                                                                                                                                                                                                                                                                                                                                                                                                                                              | WRKY77<br>WRKY11<br>WRKY72 |
| LOC_Os09g12560<br>(Os09g0297000) | No paralog                       | Ferrochelatase<br>(OsFC1)                   | 1 | Porphyrin biosynthetic process; heme biosynthetic process; protein targeting to membrane; response to oxidative stress; response to wounding; regulation of plant-type hypersensitive response; methylglyoxal catabolic process to D-lactate; endoplasmic reticulum unfolded protein response; tetrapyrrole biosynthetic process; negative                                                                                                                                                                                 | WRKY71<br>WRKY53<br>WRKY28 |

|                                  |                                                    |                                                          |                                                                                                                                                                                                                     |                            |
|----------------------------------|----------------------------------------------------|----------------------------------------------------------|---------------------------------------------------------------------------------------------------------------------------------------------------------------------------------------------------------------------|----------------------------|
|                                  |                                                    |                                                          | regulation of programmed cell death; callose deposition during defense response                                                                                                                                     |                            |
| LOC_Os12g36830<br>(Os12g0555000) | No paralog                                         | Root specific rice PR10 (RSOsPR10)                       | Defense response; response to biotic stimulus                                                                                                                                                                       | WRKY77<br>WRKY67<br>WRKY72 |
| LOC_Os02g54160<br>(Os02g0782700) | LOC_Os10g25170<br>LOC_Os06g09390<br>LOC_Os09g26420 | Ethylene-Responsive Element-Binding Protein 1 (OsEREBP1) | Transcription, DNA-dependent; regulation of transcription, DNA-dependent; defense response                                                                                                                          | WRKY11<br>WRKY8            |
| LOC_Os02g47880<br>(Os02g0708400) | No paralog                                         | Tetratricopeptide-like helical domain containing protein | Pollen tube growth; regulation of defense response                                                                                                                                                                  | WRKY121<br>WRKY94          |
| LOC_Os03g60650<br>(Os03g0821300) | LOC_Os03g16760<br>LOC_Os05g02110                   | XA21 BINDING PROTEIN 15                                  | Defense response; metabolic process; leaf development                                                                                                                                                               | WRKY12<br>WRKY74           |
| LOC_Os02g35490<br>(Os02g0562600) | LOC_Os04g36680<br>LOC_Os05g34550                   | Powdery-Mildew-resistance gene O10                       | Defense response                                                                                                                                                                                                    | WRKY47<br>WRKY72           |
| LOC_Os11g45790<br>(Os11g0684700) | No paralog                                         | NB-ARC domain containing protein                         | Defense response                                                                                                                                                                                                    | WRKY1<br>WRKY123           |
| LOC_Os02g51280<br>(Os02g0747400) | LOC_Os06g12230                                     | Teosinte branched/cycloidea/proliferating cell factor 9  | Inflorescence development; response to cytokinin stimulus; response to gibberellin stimulus; regulation of seed germination; regulation of defense response; cell proliferation; response to abscisic acid stimulus | WRKY51                     |
| LOC_Os06g17880<br>(Os06g0286500) | No paralog                                         | NBS-LRR disease resistance protein homologue             | Defense response                                                                                                                                                                                                    | WRKY29<br>WRKY72           |
| LOC_Os04g10160<br>(Os04g0180400) | No paralog                                         | Cytochrome P450 99A2 (CYP99A2)                           | Defense response; oxidation reduction                                                                                                                                                                               | WRKY77<br>WRKY79           |
| LOC_Os11g13410<br>(Os11g0237600) | No paralog                                         | Hypothetical conserved gene                              | Defense response                                                                                                                                                                                                    | WRKY61                     |
| LOC_Os11g12000<br>(Os11g0227200) | No paralog                                         | NBS-LRR disease resistance protein (OsLRR)               | Defense response                                                                                                                                                                                                    | WRKY1                      |
| LOC_Os12g36880<br>(Os12g0555500) | No paralog                                         | Pathogenesis-related gene 10a                            | Defense response; response to biotic stimulus                                                                                                                                                                       | WRKY77                     |
| LOC_Os11g42040<br>(Os11g0639600) | No paralog                                         | NB-ARC domain containing protein                         | Defense response                                                                                                                                                                                                    | WRKY1                      |
| LOC_Os02g39330<br>(Os02g0605900) | No paralog                                         | Chitinase 6, Pathogenesis related (PR)-3                 | Polysaccharide catabolic process; carbohydrate metabolic process; chitin catabolic process; defense response; metabolic process; somatic embryogenesis; cell wall macromolecule catabolic process                   | WRKY51                     |

|                                  |                |                                                           |   |                                                                                                                                                                                                                                                   |         |
|----------------------------------|----------------|-----------------------------------------------------------|---|---------------------------------------------------------------------------------------------------------------------------------------------------------------------------------------------------------------------------------------------------|---------|
| LOC_Os01g18860<br>(Os01g0293000) | LOC_Os05g04510 | S-Adenosyl-L-methionine synthetase (OsSAM3)               | 3 | Methionine metabolic process; s-adenosylmethionine biosynthetic process; one-carbon metabolic process; response to cold; lignin biosynthetic process; cellular response to iron ion                                                               | WRKY55  |
| LOC_Os02g18080<br>(Os02g0282000) | No paralog     | NB-ARC domain containing protein                          |   | Defense response                                                                                                                                                                                                                                  | WRKY29  |
| LOC_os01g08370<br>(Os01g0178900) | No paralog     | Symbiosis-related disease resistance protein              |   | Defense response                                                                                                                                                                                                                                  | WRKY1   |
| LOC_Os03g20840<br>(Os03g0324600) | No paralog     | NB-ARC domain containing protein                          |   | Defense response                                                                                                                                                                                                                                  | WRKY53  |
| Loc_os12g36850<br>(os12g0555200) | No paralog     | Pathogenesis-related gene 10b (OsPR10b)                   |   | Defense response; response to biotic stimulus                                                                                                                                                                                                     | WRKY77  |
| LOC_Os01g07300<br>(Os01g0167400) | No paralog     | Protein synthesis inhibitor II                            |   | Defense response; negative regulation of translation                                                                                                                                                                                              | WRKY10  |
| LOC_Os11g11810<br>(Os11g0225300) | No paralog     | R-gene analog 5 (OsRGA5)                                  | 5 | Defense response                                                                                                                                                                                                                                  | WRKY61  |
| LOC_Os12g37760<br>(Os12g0565100) | No paralog     | NB-ARC domain containing protein                          |   | Defense response                                                                                                                                                                                                                                  | WRKY53  |
| LOC_Os03g03700<br>(Os03g0129100) | LOC_Os10g39520 | Powdery-Mildew-resistance gene O2 and O3 (OsMLO2, OsMLO3) |   | Defense response; response to biotic stimulus                                                                                                                                                                                                     | WRKY15  |
| LOC_Os11g46070<br>(Os11g0687800) | LOC_Os12g37740 | NB-ARC domain containing protein                          |   | Defense response                                                                                                                                                                                                                                  | WRKY53  |
| LOC_Os01g57870<br>(Os01g0788500) | No paralog     | Disease resistance protein domain containing protein      |   | Defense response                                                                                                                                                                                                                                  | WRKY1   |
| LOC_Os01g63060<br>(Os01g0850100) | LOC_Os05g37910 | Phosphatidic acid phosphatase-like protein                |   | Lipid metabolic process; sphingolipid metabolic process; defense response; sphingolipid biosynthetic process                                                                                                                                      | WRKY108 |
| LOC_Os11g12330<br>(Os11g0229400) | No paralog     | NBS-LRR protein                                           |   | Defense response                                                                                                                                                                                                                                  | WRKY45  |
| LOC_Os06g18000<br>(Os06g0288100) | No paralog     | protein kinase                                            |   | Protein amino acid phosphorylation; transmembrane receptor protein tyrosine kinase signaling pathway; positive regulation of cell death; phosphorylation; positive regulation of defense response; negative regulation of floral organ abscission | WRKY107 |
| LOC_Os03g04110<br>(Os03g0133400) | No paralog     | Chitin elicitor binding protein                           |   | Cell wall macromolecule catabolic process; defense response                                                                                                                                                                                       | WRKY108 |
| LOC_Os11g07850<br>(Os11g0180200) | LOC_Os12g07590 | Protein tyrosine phosphatase 2                            | 2 | Protein amino acid dephosphorylation;                                                                                                                                                                                                             | WRKY94  |

|                                  |                                  |                                                     |                                                                                                                                                                                                                                                                                                                                                          |                                                                                                     |
|----------------------------------|----------------------------------|-----------------------------------------------------|----------------------------------------------------------------------------------------------------------------------------------------------------------------------------------------------------------------------------------------------------------------------------------------------------------------------------------------------------------|-----------------------------------------------------------------------------------------------------|
|                                  |                                  | (OsPTP2)                                            | dephosphorylation; peptidyl-tyrosine dephosphorylation; negative regulation of defense response                                                                                                                                                                                                                                                          |                                                                                                     |
| LOC_Os07g06470<br>(Os07g0158500) | LOC_Os03g44540<br>LOC_Os12g42400 | HAP2 subunit of ccaat-box binding complex (OsHAP2J) | Response to cold; lignin biosynthetic process; cellular metabolic process; steroid biosynthetic process; oxidation reduction                                                                                                                                                                                                                             | WRKY11<br>WRKY51<br>WRKY8<br>Cinnamoyl CoA reductase 20<br>NAD(P)-binding domain containing protein |
| LOC_Os11g04180<br>(Os11g0136800) | LOC_Os12g03990                   | Protein phosphatase 118 (OsPP118)                   | Inactivation of MAPK activity; protein amino acid dephosphorylation; dephosphorylation; peptidyl-tyrosine dephosphorylation; regulation of map kinase activity                                                                                                                                                                                           | WRKY29                                                                                              |
| LOC_Os05g04510<br>(Os05g0135700) | LOC_Os01g18860                   | S-Adenosyl-l-methionine synthetase (OsSAMS1)        | 1<br>Methionine metabolic process; S-adenosyl methionine biosynthetic process; one-carbon metabolic process; response to cold; lignin biosynthetic process                                                                                                                                                                                               | WRKY55                                                                                              |
| LOC_os01g22010<br>(Os01g0323600) | No paralog                       | S-Adenosyl-l-methionine synthetase (OsSAM2)         | 2<br>Methionine metabolic process; s-adenosyl methionine biosynthetic process; one-carbon metabolic process; response to cold; lignin biosynthetic process; cellular response to iron ion; response to salt stress; response to cadmium ion                                                                                                              | WRKY55                                                                                              |
| LOC_os01g05070<br>(Os01g0144000) | No paralog                       | Conserved hypothetical protein                      | Pectin metabolic process; homogalacturonan metabolic process                                                                                                                                                                                                                                                                                             | Cytochrome b5 domain containing protein                                                             |
| LOC_Os05g38150<br>(Os05g0455500) | LOC_Os01g62900                   | Delta1-pyrroline-5-carboxylate synthetase (OsP5CS)  | Proline biosynthetic process; response to oxidative stress; metabolic process; cellular amino acid biosynthetic process; response to desiccation; response to water deprivation; response to salt stress; response to abscisic acid stimulus; embryonic development ending in seed dormancy; hyperosmotic salinity response; root development; oxidation | WRKY 55                                                                                             |

|                                  |                |                                                          |                                                                                                                                                                                                                                                                                                                                                              |        |
|----------------------------------|----------------|----------------------------------------------------------|--------------------------------------------------------------------------------------------------------------------------------------------------------------------------------------------------------------------------------------------------------------------------------------------------------------------------------------------------------------|--------|
|                                  |                |                                                          | reduction; phosphorylation; l-proline biosynthetic process; pollen development                                                                                                                                                                                                                                                                               |        |
| LOC_Os01g18400<br>(Os01g0287600) | LOC_Os05g04690 | Chitinase 10,<br>Pathogenesis related<br>(PR)-3          | Polysaccharide catabolic process; carbohydrate metabolic process; chitin catabolic process; metabolic process; cell wall macromolecule catabolic process                                                                                                                                                                                                     | WRKY12 |
| LOC_Os01g32660<br>(Os01g0510100) | No paralog     | Mitogen-activated<br>protein kinase<br>kinase 6 (OsMKK6) | MAPKKK cascade; activation of MAPK activity; regulation of DNA replication; protein amino acid phosphorylation; regulation of G2/M transition of mitotic cell cycle; positive regulation of translation; phosphorylation                                                                                                                                     | WRKY71 |
| LOC_Os02g09490<br>(Os02g0187800) | No paralog     | Protein gold hull<br>and internode 2<br>(OsGH2)          | Oxidation reduction; phenylpropanoid biosynthetic process; lignin biosynthetic process                                                                                                                                                                                                                                                                       | WRKY15 |
| LOC_Os05g04170<br>(Os05g0132100) | No paralog     | long-chain acyl-<br>CoA synthetase 1<br>(OsLACS1)        | Metabolic process; cutin biosynthetic process; wax biosynthetic process                                                                                                                                                                                                                                                                                      | WRKY55 |
| LOC_Os02g27030<br>(Os02g0469600) | No paralog     | Cysteine proteinase<br>1                                 | Proteolysis; response to osmotic stress; response to desiccation; response to salt stress; defense response to bacterium                                                                                                                                                                                                                                     | WRKY77 |
| LOC_Os06g01260<br>(Os06g0102300) | No paralog     | Phytochelatin<br>synthase                                | Response to metal ion; arsenite transport; indole glucosinolate catabolic process; defense response to bacterium; response to arsenic; response to cadmium ion; phytochelatin biosynthetic process; callose deposition in cell wall during defense response                                                                                                  | WRKY53 |
| LOC_Os07g02210<br>(Os07g0112800) | LOC_Os03g55150 | Eukaryotic<br>translation initiation<br>factor 5A-4      | Translational initiation; translational frameshifting; peptidyl-lysine modification to hypusine; response to wounding; response to bacterium; xylem development; programmed cell death; host programmed cell death induced by symbiont; defense response to bacterium; positive regulation of translational elongation; positive regulation of translational | WRKY8  |

|                                  |                |                                                       |                                                                                                                                                                                                                                                                                                                                                                                                                                                                                                                                                                                                                                                                                                                                                                                                      |        |
|----------------------------------|----------------|-------------------------------------------------------|------------------------------------------------------------------------------------------------------------------------------------------------------------------------------------------------------------------------------------------------------------------------------------------------------------------------------------------------------------------------------------------------------------------------------------------------------------------------------------------------------------------------------------------------------------------------------------------------------------------------------------------------------------------------------------------------------------------------------------------------------------------------------------------------------|--------|
|                                  |                |                                                       | termination; response to cadmium ion                                                                                                                                                                                                                                                                                                                                                                                                                                                                                                                                                                                                                                                                                                                                                                 |        |
| LOC_Os01g56200<br>(Os01g0767900) | No paralog     | Non-expressor of pathogenesis-related gene 2 (OsNPR2) | Defense response to bacterium, incompatible interaction; response to bacterium; defense response to bacterium; defense response to fungus, incompatible interaction; defense response to fungus; response to fungus                                                                                                                                                                                                                                                                                                                                                                                                                                                                                                                                                                                  | WRKY53 |
| LOC_Os05g03830<br>(Os05g0129100) | No paralog     | Acetylmithine aminotransferase, mitochondrial         | Interspecies interaction between organisms; primary root development; defense response to bacterium; root development                                                                                                                                                                                                                                                                                                                                                                                                                                                                                                                                                                                                                                                                                | WRKY28 |
| LOC_Os03g46470<br>(Os03g0667500) | No paralog     | Zinc transporter 10 (OsZIP10)                         | Transport; ion transport; iron ion transport; zinc ion transport; cellular iron ion homeostasis; response to bacterium; cadmium ion transport; metal ion transport; iron ion homeostasis; transmembrane transport; zinc ion transmembrane transport                                                                                                                                                                                                                                                                                                                                                                                                                                                                                                                                                  | WRKY16 |
| LOC_Os09g28770<br>(Os09g0462400) | LOC_Os03g27610 | Patatin-related phospholipase A II eta (OspPLAIIeta)  | MAPKKK cascade; response to molecule of bacterial origin; respiratory burst during defense response; protein targeting to membrane; lipid metabolic process; metabolic process; cell death; detection of biotic stimulus; response to absence of light; salicylic acid biosynthetic process; response to ethylene stimulus; systemic acquired resistance, salicylic acid mediated signaling pathway; salicylic acid mediated signaling pathway; jasmonic acid mediated signaling pathway; response to chitin; regulation of hydrogen peroxide metabolic process; regulation of plant-type hypersensitive response; negative regulation of defense response; oxylipin biosynthetic process; defense response to bacterium; negative regulation of programmed cell death; regulation of multi-organism | WRKY53 |

|                                  |                |                                                |  |                                                                                                                                                                                                             |                                        |
|----------------------------------|----------------|------------------------------------------------|--|-------------------------------------------------------------------------------------------------------------------------------------------------------------------------------------------------------------|----------------------------------------|
|                                  |                |                                                |  | process; defense response to fungus; defense response to virus; response to other organism; response to abscisic acid stimulus; lateral root formation                                                      |                                        |
| LOC_Os10g40360<br>(Os10g0550900) | No paralog     | Proline dehydrogenase (OsProDH)                |  | Glutamate biosynthetic process; proline catabolic process; oxidation reduction; response to oxidative stress; defense response to bacterium; response to water deprivation; response to osmotic stress      | WRKY11                                 |
| LOC_Os02g47020<br>(Os02g0698000) | LOC_Os04g50880 | Phosphoribulokinase (OsPrk)                    |  | Carbohydrate metabolic process; metabolic process; response to cold; phosphorylation; defense response to bacterium                                                                                         | WRKY55                                 |
| LOC_Os09g23540<br>(Os09g0400000) | No paralog     | Cinnamyl alcohol dehydrogenase 8b (CAD8B)      |  | Response to bacterium; plant-type hypersensitive response; oxidation reduction; phenylpropanoid biosynthetic process; lignin biosynthetic process                                                           | cDNA clone:J013153 J11                 |
| LOC_Os03g57220<br>(Os03g0786100) | LOC_Os07g05820 | Glycolate oxidase 1 (OsGLO1)                   |  | Photorespiration; oxidative photosynthetic carbon pathway; regulation of photosynthesis; virus-host interaction; oxidation reduction; defense response to bacterium; hydrogen peroxide biosynthetic process | WRKY113                                |
| LOC_Os02g43360<br>(Os02g0649800) | LOC_Os10g37420 | Cytochrome homolog B5                          |  | Tryptophan catabolic process; indoleacetic acid biosynthetic process; glucosinolate biosynthetic process; defense response to bacterium                                                                     | WRKY70                                 |
| LOC_Os04g54474<br>(Os04g0637000) | LOC_Os08g07970 | bZIP 37                                        |  | Transcription; DNA dependent; regulation of transcription, DNA-dependent; response to cold; systemic acquired resistance, salicylic acid mediated signaling pathway; defense response to bacterium          | WRKY13<br>WRKY121<br>WRKY94<br>WRKY102 |
| LOC_Os03g20790<br>(Os03g0324300) | No paralog     | Ethylene insensitive 3 like 1 protein (OsEIL3) |  | Regulation of transcription, DNA-dependent; response to ethylene stimulus; defense response to bacterium; cellular response to iron ion                                                                     | WRKY11<br>WRKY121<br>WRKY8             |
| LOC_Os03g61740<br>(Os03g0833100) | No paralog     | Tasselseed2protein                             |  | Metabolic process; oxidation reduction; defense response to bacterium                                                                                                                                       | WRKY66<br>WRKY32<br>WRKY37             |

|                                   |                                  |                                                                          |                                                                                                                                                                                                                                                                                                                                                                                                                                                                                                                                                                                                                                                                                                                                                                                                      |                  |
|-----------------------------------|----------------------------------|--------------------------------------------------------------------------|------------------------------------------------------------------------------------------------------------------------------------------------------------------------------------------------------------------------------------------------------------------------------------------------------------------------------------------------------------------------------------------------------------------------------------------------------------------------------------------------------------------------------------------------------------------------------------------------------------------------------------------------------------------------------------------------------------------------------------------------------------------------------------------------------|------------------|
| LOC_Os08g42410<br>(Os08g0536000)  | LOC_Os09g33500                   | Pyruvate dehydrogenase E1 beta subunit isoform 1                         | Acetyl-CoA biosynthetic process from pyruvate; metabolic process; defense response to bacterium; glycolysis; oxidation reduction                                                                                                                                                                                                                                                                                                                                                                                                                                                                                                                                                                                                                                                                     | WRKY55           |
| LOC_Os06g48300<br>(Os06g0698300)  | LOC_Os02g05630<br>LOC_Os04g56450 | Protein phosphatase 2C59 (OsPP2C59)                                      | Protein amino acid dephosphorylation; defense response to bacterium; interspecies interaction between organisms                                                                                                                                                                                                                                                                                                                                                                                                                                                                                                                                                                                                                                                                                      | WRKY40<br>WRKY64 |
| LOC_Os04g01250<br>(Os04g0102700)  | No paralog                       | Fatty acid amide hydrolase (OsFAAH)                                      | Defense response to bacterium; acylethanolamine metabolic process                                                                                                                                                                                                                                                                                                                                                                                                                                                                                                                                                                                                                                                                                                                                    | WRKY55<br>WRKY61 |
| LOC_Os12g39620<br>(Os12g0586000)  | No paralog                       | Disease resistance protein ADR1 (Activated disease resistance protein 1) | Defense response; response to other organism; defense response to bacterium; response to water deprivation                                                                                                                                                                                                                                                                                                                                                                                                                                                                                                                                                                                                                                                                                           | WRKY10<br>WRKY53 |
| Loc_os08g04130<br>(os08g0135400 ) | No paralog                       | RING finger protein (OsRFPHC-2)                                          | Protein amino acid n-linked glycosylation; calcium ion transport; response to wounding; cytokinin metabolic process; jasmonic acid mediated signaling pathway; protein ubiquitination; defense response to bacterium                                                                                                                                                                                                                                                                                                                                                                                                                                                                                                                                                                                 | WRKY15<br>WRKY87 |
| LOC_Os11g09010<br>(Os11g0195500)  | No paralog                       | Phytoalexin deficient 4 (OsPAD4)                                         | MAPKKK cascade; response to hypoxia; defense response to insect; respiratory burst during defense response; regulation of transcription, DNA-dependent; protein targeting to membrane; lipid metabolic process; cell communication; response to cold; detection of external stimulus; detection of biotic stimulus; response to bacterium; response to insect; salicylic acid biosynthetic process; abscisic acid mediated signaling pathway; defense response to bacterium, incompatible interaction; systemic acquired resistance, salicylic acid mediated signaling pathway; salicylic acid mediated signaling pathway; jasmonic acid mediated signaling pathway; leaf senescence; response to chitin; regulation of hydrogen peroxide metabolic process; regulation of plant-type hypersensitive | WRKY69           |



|                                  |                |                                           |                                                                                                                                                                                                                                                                                                                                                                                                                                                                                                                        |                                                 |
|----------------------------------|----------------|-------------------------------------------|------------------------------------------------------------------------------------------------------------------------------------------------------------------------------------------------------------------------------------------------------------------------------------------------------------------------------------------------------------------------------------------------------------------------------------------------------------------------------------------------------------------------|-------------------------------------------------|
|                                  |                |                                           | response; aerenchyma formation; positive regulation of cell death; endoplasmic reticulum unfolded protein response; regulation of defense response; negative regulation of defense response; regulation of protein amino acid dephosphorylation; defense response to bacterium; negative regulation of programmed cell death; regulation of multi-organism process; innate immune response; regulation of innate immune response; defense response to fungus; response to other organism; systemic acquired resistance |                                                 |
| LOC_Os12g26290<br>(Os12g0448900) | No paralog     | Pathogen-inducible oxygenase<br>(OsPIOX)  | Response to oxidative stress; oxidation reduction; fatty acid alpha-oxidation; long-chain fatty acid metabolic process; fatty acid metabolic process; cell death; response to salicylic acid stimulus; leaf senescence; cellular response to reactive oxygen species; cellular response to salicylic acid stimulus; defense response to bacterium; systemic acquired resistance; response to abscisic acid stimulus                                                                                                    | WRKY11                                          |
| LOC_Os02g09940<br>(Os02g0192700) | LOC_Os06g42000 | Peroxiredoxin IIE2                        | Defense response to bacterium; oxidation reduction                                                                                                                                                                                                                                                                                                                                                                                                                                                                     | WRKY72                                          |
| LOC_Os07g48630<br>(Os07g0685700) | LOC_Os03g20780 | Ethylene insensitive-like gene 2          | Regulation of transcription, DNA-dependent; response to ethylene stimulus; defense response to bacterium                                                                                                                                                                                                                                                                                                                                                                                                               | WRKY11<br>WRKY108<br>WRKY71<br>WRKY8            |
| LOC_Os03g03450<br>(Os03g0126000) | No paralog     | Phosphorybosyl anthranilate transferase 1 | Tryptophan biosynthetic process; metabolic process; tryptophan catabolic process; systemic acquired resistance; indoleacetic acid biosynthetic process; response to endoplasmic reticulum stress; defense response to bacterium                                                                                                                                                                                                                                                                                        | WRKY55                                          |
| LOC_Os03g17700<br>(Os03g0285800) | No paralog     | Multiple stress responsive map kinase 2   | MAPKKK cascade; activation of MAPK activity involved in osmosensory signaling pathway; response to hypoxia; regulation of                                                                                                                                                                                                                                                                                                                                                                                              | WRKY108<br>WRKY24<br>WRKY71<br>WRKY53<br>WRKY07 |

|                                  |            |                                                               |                                                                                                                                                                                                                                                                                                                                                                                                                                                                                                                                                                                                                                                                                                                                                                                                                                                                                                                                                                                                                                                                                                                                                                                                                                                |                                      |
|----------------------------------|------------|---------------------------------------------------------------|------------------------------------------------------------------------------------------------------------------------------------------------------------------------------------------------------------------------------------------------------------------------------------------------------------------------------------------------------------------------------------------------------------------------------------------------------------------------------------------------------------------------------------------------------------------------------------------------------------------------------------------------------------------------------------------------------------------------------------------------------------------------------------------------------------------------------------------------------------------------------------------------------------------------------------------------------------------------------------------------------------------------------------------------------------------------------------------------------------------------------------------------------------------------------------------------------------------------------------------------|--------------------------------------|
|                                  |            |                                                               | transcription, DNA-dependent; protein amino acid phosphorylation; protein targeting to membrane; response to osmotic stress; response to oxidative stress; signal transduction; response to cold; detection of biotic stimulus; response to wounding; response to bacterium; salicylic acid biosynthetic process; abscisic acid mediated signaling pathway; defense response, incompatible interaction; systemic acquired resistance, salicylic acid mediated signaling pathway; salicylic acid mediated signaling pathway; jasmonic acid mediated signaling pathway; camalexin biosynthetic process; response to chitin; response to UV-B; inflorescence development; regulation of hydrogen peroxide metabolic process; regulation of plant-type hypersensitive response; stomatal complex development; phosphorylation; photosynthesis, light reaction; regulation of defense response; negative regulation of defense response; regulation of protein amino acid dephosphorylation; defense response to bacterium; negative regulation of programmed cell death; regulation of multi-organism process; ovule development; defense response to fungus; response to other organism; priming of cellular response to stress; defense response |                                      |
| LOC_Os01g54510<br>(Os01g0748900) | No paralog | Membrane attack complex/perforin/complement C9 family protein | MAPKKK cascade; respiratory burst during defense response; protein targeting to membrane; immune response; cell death; plant-type hypersensitive response; systemic acquired resistance, salicylic acid                                                                                                                                                                                                                                                                                                                                                                                                                                                                                                                                                                                                                                                                                                                                                                                                                                                                                                                                                                                                                                        | WRKY71<br>WRKY51<br>WRKY53<br>WRKY28 |

|                                                   |            |                                                |    |                                                                                                                                                                                                                                                                                                                                                                                                                                             |                            |
|---------------------------------------------------|------------|------------------------------------------------|----|---------------------------------------------------------------------------------------------------------------------------------------------------------------------------------------------------------------------------------------------------------------------------------------------------------------------------------------------------------------------------------------------------------------------------------------------|----------------------------|
|                                                   |            |                                                |    | mediated signaling pathway; jasmonic acid mediated signaling pathway; response to chitin; regulation of hydrogen peroxide metabolic process; regulation of salicylic acid metabolic process; regulation of plant-type hypersensitive response; negative regulation of defense response; defense response to bacterium; negative regulation of programmed cell death; defense response to fungus; callose deposition during defense response |                            |
| LOC_Os06g07030<br>(Os06g0166400)                  | No paralog | Ethylene response factor 7 (OsERF7)            |    | Transcription, DNA-dependent; regulation of transcription, DNA-dependent; response to cold; positive regulation of transcription, DNA-dependent; response to water deprivation; regulation of cell death; response to bacterium; defense response to bacterium; response to chitin                                                                                                                                                          | WRKY21<br>WRKY48<br>WRKY54 |
| LOC_Os03g08220<br>(Os03g0179900,<br>Os03g0179950) | No paralog | Lipoxygenase (OsLOX0)                          | 2  | Pollen development; response to fungus; anther dehiscence; anther development; oxidation reduction; stamen filament development; fatty acid biosynthetic process; oxylipin biosynthetic process; lipid metabolic process; fatty acid metabolic process; lipid oxidation; response to jasmonic acid stimulus; response to high light intensity; response to wounding; response to ozone; response to bacterium                               | WRKY71<br>WRKY53<br>WRKY28 |
| LOC_Os11g37950<br>(Os11g0592000)                  | No paralog | PR protein (OsPR4c)                            | 4c | Response to virus; systemic acquired resistance; response to salt stress; response to ethylene stimulus; defense response to fungus, incompatible interaction; defense response to bacterium; defense response to fungus; response to herbivore                                                                                                                                                                                             | WRKY14                     |
| LOC_Os01g71380<br>(Os01g0941200)                  | No paralog | Glucan endo-1,3-beta-glucosidase GII precursor |    | Carbohydrate metabolic process; metabolic process; response to cold; response to                                                                                                                                                                                                                                                                                                                                                            | WRKY53                     |

---

bacterium; response to salt  
stress; defense response to  
fungus, incompatible  
interaction

---

Locus IDs in red are from the 100 genes represented in Fig.4. Other genes are from total 2299 genes. Genes were selected based on their connectivity to either WRKY TFs already reported for disease resistance in rice or the WRKY TFs phosphorylated by MAPKs.

**Supplementary Table 7.** Guide genes connected to one another in RiceNet (ranked by total connectivity)

| <b>RGAP7.0 Locus<br/>(RAP-DB Locus)</b> | <b>Gene names</b> | <b>Oryza sativa Gramene GO<br/>biological process</b> | <b>Number of<br/>connected guide<br/>gene / number of<br/>valid guide gene</b> | <b>Connected<br/>WRKY guide<br/>gene</b>                                                                              |
|-----------------------------------------|-------------------|-------------------------------------------------------|--------------------------------------------------------------------------------|-----------------------------------------------------------------------------------------------------------------------|
| LOC_Os02g08440<br>(Os02g0181300)        | WRKY71            | Na                                                    | 10/82                                                                          | WRKY01<br>WRKY15<br>WRKY108<br>WRKY21<br>WRKY24<br>WRKY53<br>WRKY48<br>WRKY54<br>WRKY28<br>WRKY74                     |
| LOC_Os06g44010<br>(Os06g0649000)        | WRKY28            | Regulation of transcription, DNA -<br>dependent       | 9/82                                                                           | WRKY15<br>WRKY21<br>WRKY24<br>WRKY71<br>WRKY67<br>WRKY53<br>WRKY48<br>WRKY54<br>WRKY07                                |
| LOC_Os01g60640<br>(Os01g0821600)        | WRKY21            | Regulation of transcription, DNA -<br>dependent       | 12/82                                                                          | WRKY11<br>WRKY22<br>WRKY71<br>WRKY45<br>WRKY48<br>WRKY54<br>WRKY08<br>WRKY28<br>WRKY69<br>WRKY74<br>WRKY104<br>WRKY95 |
| LOC_Os05g40080<br>(Os05g0478800)        | WRKY54            | Regulation of transcription, DNA -<br>dependent       | 10/82                                                                          | WRKY11<br>WRKY22<br>WRKY21<br>WRKY71<br>WRKY45<br>WRKY48<br>WRKY08<br>WRKY28<br>WRKY104<br>WRKY95                     |

|                                  |         |                                                                                                                                                                                                                                                                                                                                                                           |       |                                                                                                   |
|----------------------------------|---------|---------------------------------------------------------------------------------------------------------------------------------------------------------------------------------------------------------------------------------------------------------------------------------------------------------------------------------------------------------------------------|-------|---------------------------------------------------------------------------------------------------|
| LOC_Os05g40060<br>(Os05g0478400) | WRKY48  | Regulation of transcription, DNA-dependent                                                                                                                                                                                                                                                                                                                                | 10/82 | WRKY11<br>WRKY22<br>WRKY21<br>WRKY71<br>WRKY45<br>WRKY48<br>WRKY08<br>WRKY28<br>WRKY104<br>WRKY95 |
| LOC_Os05g27730<br>(Os05g0343400) | WRKY53  | Regulation of transcription, DNA-dependent; camalexin biosynthetic process; cellular heat acclimation; cellular response to heat; response to cold; response to heat; positive regulation of autophagy; defense response to bacterium; response to chitin; response to salt stress; defense response to fungus; response to water deprivation; response to osmotic stress | 7/82  | WRKY01<br>WRKY15<br>WRKY71<br>WRKY07<br>WRKY113<br>WRKY28<br>WRKY74                               |
| LOC_Os05g25770<br>(Os05g0322900) | WRKY45  | Regulation of transcription, DNA-dependent                                                                                                                                                                                                                                                                                                                                | 9/82  | WRKY11<br>WRKY22<br>WRKY21<br>WRKY48<br>WRKY54<br>WRKY08<br>WRKY76<br>WRKY104<br>WRKY95           |
| LOC_Os01g43650<br>(Os01g0626400) | WRKY11  | Regulation of transcription, DNA-dependent                                                                                                                                                                                                                                                                                                                                | 6/82  | WRKY21<br>WRKY51<br>WRKY45<br>WRKY48<br>WRKY54<br>WRKY08                                          |
| LOC_Os12g02440<br>(Os12g0116600) | WRKY95  | Regulation of transcription, DNA-dependent                                                                                                                                                                                                                                                                                                                                | 5/82  | WRKY21<br>WRKY45<br>WRKY48<br>WRKY54<br>WRKY104                                                   |
| LOC_Os11g02520<br>(Os11g0117400) | WRKY104 | Regulation of transcription, DNA-dependent                                                                                                                                                                                                                                                                                                                                | 5/82  | WRKY21<br>WRKY45<br>WRKY48<br>WRKY54<br>WRKY95                                                    |
| LOC_Os05g46020<br>(Os05g0537100) | WRKY7   | Regulation of transcription, DNA-dependent                                                                                                                                                                                                                                                                                                                                | 5/82  | WRKY16<br>WRKY67<br>WRKY53<br>WRKY28<br>WRKY87                                                    |

|                                                  |         |                                                                                                                                                                                                                                 |      |                                                          |
|--------------------------------------------------|---------|---------------------------------------------------------------------------------------------------------------------------------------------------------------------------------------------------------------------------------|------|----------------------------------------------------------|
| LOC_Os05g50610<br>(Os05g0583000)                 | WRKY8   | Regulation of transcription, DNA-dependent                                                                                                                                                                                      | 6/82 | WRKY11<br>WRKY21<br>WRKY51<br>WRKY45<br>WRKY48<br>WRKY54 |
| LOC_Os01g61080<br>(Os01g0826400)                 | WRKY24  | Regulation of transcription, DNA-dependent                                                                                                                                                                                      | 5/82 | WRKY01<br>WRKY71<br>WRKY42<br>WRKY28<br>WRKY69           |
| LOC_Os01g60490<br>(Os01g0820400)                 | WRKY22  | Regulation of transcription, DNA-dependent                                                                                                                                                                                      | 4/82 | WRKY21<br>WRKY45<br>WRKY48<br>WRKY54                     |
| LOC_Os07g39480<br>(Os07g0583700)                 | WRKY87  | Regulation of transcription, DNA-dependent; virus induced gene silencing; vegetative phase change; positive regulation of transcription, DNA-dependent; response to 1-aminocyclopropane-1-carboxylic acid; response to wounding | 3/82 | WRKY16<br>WRKY26<br>WRKY07                               |
| LOC_Os01g47560<br>(Os01g0665500<br>Os01g0665750) | WRKY16  | Regulation of transcription, DNA-dependent                                                                                                                                                                                      | 3/82 | WRKY26<br>WRKY07<br>WRKY87                               |
| LOC_Os09g16510<br>(Os09g0334500)                 | WRKY74  | Regulation of transcription, DNA-dependent                                                                                                                                                                                      | 4/82 | WRKY21<br>WRKY71<br>WRKY53<br>WRKY69                     |
| LOC_Os04g21950<br>(Os04g0287400)                 | WRKY51  | Regulation of transcription, DNA-dependent; defense response to bacterium; response to chitin                                                                                                                                   | 3/82 | WRKY10<br>WRKY11<br>WRKY08                               |
| LOC_Os01g46800<br>(Os01g0656400)                 | WRKY15  | Regulation of transcription, DNA-dependent                                                                                                                                                                                      | 4/82 | WRKY71<br>WRKY53<br>WRKY113<br>WRKY28                    |
| LOC_Os08g29660<br>(Os08g0386200)                 | WRKY69  | Regulation of transcription, DNA-dependent                                                                                                                                                                                      | 3/82 | WRKY21<br>WRKY24<br>WRKY74                               |
| LOC_Os11g29870<br>(Os11g0490900)                 | WRKY72  | Regulation of transcription, DNA-dependent                                                                                                                                                                                      | 3/82 | WRKY77<br>WRKY03<br>WRKY 29                              |
| LOC_Os01g51690<br>(Os01g0714800)                 | WRKY26  | Regulation of transcription, DNA-dependent                                                                                                                                                                                      | 2/82 | WRKY16<br>WRKY87                                         |
| LOC_Os01g14440<br>(Os01g0246700)                 | WRKY 1  | na                                                                                                                                                                                                                              | 3/82 | WRKY24<br>WRKY71<br>WRKY53                               |
| LOC_Os09g25060<br>(Os09g0417600)                 | WRKY76  | Regulation of transcription, DNA-dependent                                                                                                                                                                                      | 2/82 | WRKY45<br>WRKY62                                         |
| LOC_Os06g06360<br>(Os06g0158100)                 | WRKY113 | Regulation of transcription, DNA-dependent                                                                                                                                                                                      | 2/82 | WRKY15<br>WRKY53                                         |
| LOC_Os05g09020<br>(Os05g0183100)                 | WRKY67  | Regulation of transcription, DNA-dependent                                                                                                                                                                                      | 2/82 | WRKY07<br>WRKY28                                         |

|                                                  |                                                 |                                                                                                                                                 |      |                                                 |
|--------------------------------------------------|-------------------------------------------------|-------------------------------------------------------------------------------------------------------------------------------------------------|------|-------------------------------------------------|
| LOC_Os07g02060<br>(Os07g0111400)                 | WRKY29                                          | Regulation of transcription, DNA-dependent                                                                                                      | 2/82 | WRKY123<br>WRKY72                               |
| LOC_Os11g02530<br>(Os11g0117500)                 | WRKY40                                          | Regulation of transcription, DNA-dependent                                                                                                      | 1/82 | WRKY64                                          |
| LOC_Os12g02450<br>(Os12g0116700)                 | WRKY64                                          | Regulation of transcription, DNA-dependent                                                                                                      | 1/82 | WRKY40                                          |
| LOC_Os04g51560<br>(Os04g0605100)                 | WRKY68                                          | Regulation of transcription, DNA-dependent                                                                                                      | 2/82 | WRKY39<br>WRKY25                                |
| LOC_Os02g26430<br>(Os02g0462800)                 | WRKY42                                          | Regulation of transcription, DNA-dependent                                                                                                      | 1/82 | WRKY24                                          |
| LOC_Os09g25070<br>(Os09g0417800)                 | WRKY62                                          | Regulation of transcription, DNA-dependent                                                                                                      | 1/82 | WRKY76                                          |
| LOC_Os01g40260<br>(Os01g0584900)                 | WRKY77                                          | Regulation of transcription, DNA-dependent; jasmonic acid mediated signaling pathway; defense response to bacterium; defense response to fungus | 1/82 | WRKY72                                          |
| LOC_Os11g01180<br>(Os11g0102700)                 | Peptidase C48, SUMO/Sentrin/Ubl1 family protein | Proteolysis                                                                                                                                     | 1/82 | WRKY57                                          |
| LOC_Os12g01180<br>(Os12g0102300<br>Os12g0102350) | WRKY57                                          | Proteolysis; regulation of transcription, DNA-dependent                                                                                         | 1/82 | Peptidase C48, SUMO/Sentrin/Ubl1 family protein |
| LOC_Os02g16540<br>(Os02g0265200)                 | WRKY39                                          | Regulation of transcription, DNA-dependent                                                                                                      | 1/82 | WRKY68                                          |
| LOC_Os01g09100<br>(Os01g0186000)                 | WRKY10                                          | Regulation of transcription, DNA-dependent                                                                                                      | 1/82 | WRKY51                                          |
| LOC_Os01g60600<br>(Os01g0821300)                 | WRKY108                                         | Regulation of transcription, DNA-dependent                                                                                                      | 1/82 | WRKY71                                          |
| LOC_Os07g17230<br>(Os07g0273700)                 | WRKY123                                         | Transcription, DNA-dependent; regulation of transcription, DNA-dependent; defense response                                                      | 1/82 | WRKY29                                          |
| LOC_Os08g13840<br>(Os08g0235800)                 | WRKY25                                          | Regulation of transcription, DNA-dependent                                                                                                      | 1/82 | WRKY68                                          |
| LOC_Os03g55080<br>(Os03g0758000<br>Os03g0758050) | WRKY3                                           | Regulation of transcription, DNA-dependent; response to salt stress; response to water deprivation; response to osmotic stress                  | 1/82 | WRKY72                                          |



**Supplementary Table 8.** Disconnected guide gene(s) in RiceNet

| <b>RGAP7.0 Locus<br/>(RAP-DB Locus)</b> | <b>Gene descriptions</b> | <b>Oryza sativa Gramene GO biological process</b>                                                                                                                                                                                                                                                                                                                                                                                                                                                                                                                                                                                                                                                                                                                |
|-----------------------------------------|--------------------------|------------------------------------------------------------------------------------------------------------------------------------------------------------------------------------------------------------------------------------------------------------------------------------------------------------------------------------------------------------------------------------------------------------------------------------------------------------------------------------------------------------------------------------------------------------------------------------------------------------------------------------------------------------------------------------------------------------------------------------------------------------------|
| LOC_Os01g43550<br>(Os01g0624700)        | WRKY12                   | Regulation of transcription, DNA-dependent                                                                                                                                                                                                                                                                                                                                                                                                                                                                                                                                                                                                                                                                                                                       |
| LOC_Os12g02420<br>(Os12g0116400)        | WRKY97                   | Regulation of transcription, DNA-dependent                                                                                                                                                                                                                                                                                                                                                                                                                                                                                                                                                                                                                                                                                                                       |
| LOC_Os05g04640<br>(Os05g0137500)        | WRKY5                    | Regulation of transcription, DNA-dependent                                                                                                                                                                                                                                                                                                                                                                                                                                                                                                                                                                                                                                                                                                                       |
| LOC_Os09g30400<br>(Os09g0481700)        | WRKY90                   | Regulation of transcription, DNA-dependent                                                                                                                                                                                                                                                                                                                                                                                                                                                                                                                                                                                                                                                                                                                       |
| LOC_Os08g38990<br>(Os08g0499300)        | WRKY30                   | Regulation of transcription, DNA-dependent                                                                                                                                                                                                                                                                                                                                                                                                                                                                                                                                                                                                                                                                                                                       |
| LOC_Os02g47060<br>(Os02g0698800)        | WRKY66                   | Regulation of transcription, DNA-dependent                                                                                                                                                                                                                                                                                                                                                                                                                                                                                                                                                                                                                                                                                                                       |
| LOC_Os03g58420<br>(Os03g0798500)        | WRKY6                    | Na                                                                                                                                                                                                                                                                                                                                                                                                                                                                                                                                                                                                                                                                                                                                                               |
| LOC_Os03g20550<br>(Os03g0321700)        | WRKY55                   | Regulation of transcription, DNA-dependent                                                                                                                                                                                                                                                                                                                                                                                                                                                                                                                                                                                                                                                                                                                       |
| LOC_Os05g39720<br>(Os05g0474800)        | WRKY70                   | Regulation of transcription, DNA-dependent                                                                                                                                                                                                                                                                                                                                                                                                                                                                                                                                                                                                                                                                                                                       |
| LOC_Os03g20560<br>(Os03g0321800)        | WRKY 55.                 | Sulfur amino acid metabolic process; pentose-phosphate shunt; rna processing; protein modification process; glycine catabolic process; unsaturated fatty acid biosynthetic process; oxidoreduction coenzyme metabolic process; vitamin metabolic process; cellular amino acid biosynthetic process; aromatic amino acid family metabolic process; lipoate metabolic process; lipoate biosynthetic process; coenzyme biosynthetic process; nucleotide metabolic process; protein lipoylation; jasmonic acid biosynthetic process; chlorophyll biosynthetic process; methylglyoxal catabolic process to D-lactate; isopentenyl diphosphate biosynthetic process, mevalonate-independent pathway; secondary metabolic process; sulfur compound biosynthetic process |
| LOC_Os01g54600<br>(Os01g0750100)        | WRKY13                   | Regulation of transcription, DNA-dependent; brassinosteroid biosynthetic process                                                                                                                                                                                                                                                                                                                                                                                                                                                                                                                                                                                                                                                                                 |
| LOC_Os12g40570<br>(Os12g0597700)        | WRKY94                   | Regulation of transcription, DNA-dependent                                                                                                                                                                                                                                                                                                                                                                                                                                                                                                                                                                                                                                                                                                                       |
| LOC_Os01g74140<br>(Os01g0972800)        | WRKY17                   | Regulation of transcription, DNA-dependent                                                                                                                                                                                                                                                                                                                                                                                                                                                                                                                                                                                                                                                                                                                       |
| LOC_Os01g53040<br>(Os01g0730700)        | WRKY14                   | Transition metal ion transport; regulation of transcription, DNA-dependent; iron ion transport; cellular response to iron ion starvation; response to nitrate; inorganic anion transport; nitrate transport                                                                                                                                                                                                                                                                                                                                                                                                                                                                                                                                                      |
| LOC_Os08g23754<br>(Os08g0326900)        | cDNA clone               | Na                                                                                                                                                                                                                                                                                                                                                                                                                                                                                                                                                                                                                                                                                                                                                               |
| LOC_Os01g53260<br>(Os01g0734000)        | WRKY23                   | Regulation of transcription, DNA-dependent                                                                                                                                                                                                                                                                                                                                                                                                                                                                                                                                                                                                                                                                                                                       |

|                                                   |                                                   |                                                                                                                                                                                                        |
|---------------------------------------------------|---------------------------------------------------|--------------------------------------------------------------------------------------------------------------------------------------------------------------------------------------------------------|
| LOC_Os04g39570<br>(Os04g0471700)                  | WRKY35                                            | Regulation of transcription, DNA-dependent                                                                                                                                                             |
| LOC_Os02g53100<br>(Os02g0770500)                  | WRKY32                                            | Regulation of transcription, DNA-dependent; transition metal ion transport; iron ion transport; response to zinc ion; cellular response to iron ion starvation; response to nitrate; nitrate transport |
| LOC_Os01g09080<br>(Os01g0185900)                  | WRKY107                                           | Regulation of transcription, DNA-dependent                                                                                                                                                             |
| LOC_Os06g05380<br>(Os06g0146250)                  | WRKY73                                            | Regulation of transcription, DNA-dependent                                                                                                                                                             |
| LOC_Os04g46060<br>(Os04g0545000)                  | WRKY36                                            | Regulation of transcription, DNA-dependent                                                                                                                                                             |
| LOC_Os10g42850<br>(Os10g0579400)                  | WRKY2                                             | Na                                                                                                                                                                                                     |
| LOC_Os08g29669<br>(Os08g0386300)                  | cytochrome b5-like<br>Heme/Steroid binding domain | Na                                                                                                                                                                                                     |
| LOC_Os05g50680<br>(Os05g0583600)                  | WRKY83                                            | Negative regulation of transcription, DNA-dependent                                                                                                                                                    |
| LOC_Os01g60650<br>(Os01g0821700)                  | Chitin-binding lectin 1<br>precursor (PL-I)       | Na                                                                                                                                                                                                     |
| LOC_Os03g21710<br>(Os03g0335200)                  | WRKY79                                            | Regulation of transcription, DNA-dependent                                                                                                                                                             |
| LOC_Os03g53050<br>(Os03g0741400)                  | WRKY121                                           | Regulation of transcription, DNA-dependent                                                                                                                                                             |
| LOC_Os07g40570<br>(Os07g0596900)                  | WRKY88                                            | Regulation of transcription, DNA-dependent                                                                                                                                                             |
| LOC_Os11g02480<br>(Os11g0116900)                  | WRKY46,                                           | Regulation of transcription, DNA-dependent                                                                                                                                                             |
| LOC_Os07g48260<br>(Os07g0680400)                  | WRKY47                                            | Regulation of transcription, DNA-dependent                                                                                                                                                             |
| LOC_Os11g45850<br>(Os11g0685700)                  | WRKY61                                            | Regulation of transcription, DNA-dependent                                                                                                                                                             |
| LOC_Os03g55164<br>(Os03g0758900,<br>Os03g0758950) | WRKY4                                             | Regulation of transcription, DNA-dependent; regulation of defense response                                                                                                                             |
| LOC_Os04g50920<br>(Os04g0597300)                  | WRKY37                                            | Regulation of transcription, DNA-dependent                                                                                                                                                             |
| LOC_Os05g03900<br>(Os05g0129800)                  | WRKY109                                           | Regulation of transcription, DNA-dependent                                                                                                                                                             |

**Supplementary Table 9.** Valid *Oryza sativa* guide genes but NOT found in RiceNet

| <b>RGAP7.0<br/>ORF_ID</b> | <b>RAP-DB ID</b> | <b>RAP and MSU7</b>          | <b><i>Oryza sativa</i> GO biological process</b>                     |
|---------------------------|------------------|------------------------------|----------------------------------------------------------------------|
| LOC_Os01g62600            | Os01g0843800     | laccase precursor<br>protein | oxidation reduction; lignin catabolic process                        |
| LOC_Os01g62514            | Os01g0842801     | WRKY56                       | regulation of transcription, DNA-dependent                           |
| LOC_Os03g63810            | Os03g0855100     | WRKY80                       | regulation of transcription, DNA-dependent                           |
| LOC_Os05g40070            | Os05g0478700     | WRKY84                       | regulation of transcription, DNA-dependent                           |
| LOC_Os11g02470            | Os11g0116600     | WRKY52                       | na                                                                   |
| LOC_Os08g17400            | Os08g0276200     | WRKY89                       | regulation of transcription, DNA-dependent;<br>endosperm development |
| LOC_Os02g43560            | Os02g0652100     | WRKY34                       | regulation of transcription, DNA-dependent                           |

**Supplementary Table 10.** List of genes co-expressing along with WRKY genes obtained from direct network neighborhood analysis associated (Top 100 predictions are shown)

| <b>RGAP7.0 Locus<br/>(RAP-DB Locus)</b> | <b>Paralogs</b> | <b>Gene descriptions</b>                          | <b><i>Oryza sativa</i> Gramene GO<br/>biological process</b>                                                                                                                                                                                                                                                                                                | <b>Connected guide<br/>WRKY gene</b>                                                                       |
|-----------------------------------------|-----------------|---------------------------------------------------|-------------------------------------------------------------------------------------------------------------------------------------------------------------------------------------------------------------------------------------------------------------------------------------------------------------------------------------------------------------|------------------------------------------------------------------------------------------------------------|
| LOC_Os03g47280<br>(Os03g0676400)        | No Paralog      | VQ domain containing protein 13<br>(OsVQ13)       | na                                                                                                                                                                                                                                                                                                                                                          | WRKY01<br>WRKY11<br>WRKY15<br>WRKY16<br>WRKY26<br>WRKY23<br>WRKY71<br>WRKY10<br>WRKY08<br>WRKY28<br>WRKY78 |
| LOC_Os06g46950<br>(Os06g0683400)        | No Paralog      | EF-hand Ca <sup>2+</sup> -binding protein<br>CCD1 | na                                                                                                                                                                                                                                                                                                                                                          | WRKY11<br>WRKY21<br>WRKY24<br>WRKY71<br>WRKY42<br>WRKY53<br>WRKY08<br>WRKY28                               |
| LOC_Os04g58810<br>(Os04g0684900)        | No Paralog      | CCR4 associated factor 1B<br>(OsCAF1B)            | Nuclear-transcribed mRNA<br>poly(A) tail shortening; defense<br>response to insect; defense<br>response to bacterium; response<br>to wounding                                                                                                                                                                                                               | WRKY01<br>WRKY15<br>WRKY21<br>WRKY71<br>WRKY12<br>WRKY28                                                   |
| LOC_Os02g21040<br>(Os02g0314600)        | No Paralog      | Peptidase A1 domain                               | Proteolysis                                                                                                                                                                                                                                                                                                                                                 | WRKY01<br>WRKY21<br>WRKY24<br>WRKY71<br>WRKY42<br>WRKY53<br>WRKY28<br>WRKY69                               |
| LOC_Os02g43150<br>(Os02g0645600)        | LOC_Os04g45650  | AG-motif binding protein 3                        | Regulation of transcription,<br>DNA-dependent; positive<br>regulation of transcription,<br>DNA-dependent                                                                                                                                                                                                                                                    | WRKY11<br>WRKY21<br>WRKY121<br>WRKY45<br>WRKY48<br>WRKY54<br>WRKY08<br>WRKY94                              |
| LOC_Os10g41230<br>(Os10g0561800)        | LOC_Os04g46350  | Homeodomain gene 1 (Oshox1)                       | Transcription, DNA-dependent;<br>regulation of transcription,<br>DNA-dependent; shade<br>avoidance; response to<br>hormone stimulus; response to<br>far red light; shoot<br>morphogenesis; response to<br>cytokinin stimulus;<br>unidimensional cell growth;<br>negative regulation of<br>transcription, DNA-dependent;<br>response to auxin stimulus; root | WRKY11<br>WRKY21<br>WRKY121<br>WRKY34<br>WRKY45<br>WRKY48<br>WRKY54<br>WRKY08<br>WRKY94                    |

|                                  |                |                                                      |                                                                                                                                                                                                                                                                                                                                                                                                                                                                                                                 |                                                                                         |
|----------------------------------|----------------|------------------------------------------------------|-----------------------------------------------------------------------------------------------------------------------------------------------------------------------------------------------------------------------------------------------------------------------------------------------------------------------------------------------------------------------------------------------------------------------------------------------------------------------------------------------------------------|-----------------------------------------------------------------------------------------|
|                                  |                |                                                      | development; cell proliferation; fruit septum development; reproductive developmental process; floral meristem determinacy; gynoecium development; meristem development; auxin mediated signaling pathway                                                                                                                                                                                                                                                                                                       |                                                                                         |
| LOC_Os09g34250<br>(Os09g0518200) | No Paralog     | Salicylic acid glucotransferase<br>(OsSGT)           | Metabolic process; salicylic acid metabolic process; shoot morphogenesis; benzoate metabolic process; glucosinolate biosynthetic process; cellular response to water deprivation; defense response to bacterium; para-aminobenzoic acid metabolic process; callose deposition in cell wall during defense response; cellular response to hydrogen peroxide; cellular response to abscisic acid stimulus; cellular hyperosmotic salinity response; indolebutyric acid metabolic process; auxin metabolic process | WRKY11<br>WRKY21<br>WRKY51<br>WRKY45<br>WRKY48<br>WRKY54<br>WRKY08                      |
| LOC_Os09g34214<br>(Os09g0517900) | No Paralog     | UDP-glucuronosyl and UDP-glucosyl transferase domain | Metabolic process; salicylic acid metabolic process; shoot morphogenesis; benzoate metabolic process; cellular response to water deprivation; para-aminobenzoic acid metabolic process; cellular response to hydrogen peroxide; cellular response to abscisic acid stimulus; cellular hyperosmotic salinity response; indolebutyric acid metabolic process                                                                                                                                                      | WRKY11<br>WRKY21<br>WRKY51<br>WRKY45<br>WRKY48<br>WRKY54<br>WRKY08                      |
| LOC_Os02g43790<br>(Os02g0654700) | LOC_Os04g46220 | Ethylene-responsive factor 91<br>(OsERF91)           | Transcription, DNA-dependent; regulation of transcription, DNA-dependent                                                                                                                                                                                                                                                                                                                                                                                                                                        | WRKY71<br>WRKY53<br>WRKY54<br>WRKY28                                                    |
| LOC_Os08g34790<br>(Os08g0448000) | No Paralog     | 4- Coumarate:<br>coenzyme A Ligase5                  | Metabolic process; phenylpropanoid metabolic process                                                                                                                                                                                                                                                                                                                                                                                                                                                            | WRKY01<br>WRKY108<br>WRKY24<br>WRKY71<br>WRKY67<br>WRKY45<br>WRKY53<br>WRKY07<br>WRKY28 |
| LOC_Os06g36160<br>(Os06g0555400) | LOC_Os02g13530 | 40S ribosomal protein S24                            | Translation                                                                                                                                                                                                                                                                                                                                                                                                                                                                                                     | WRKY22<br>WRKY21<br>WRKY48<br>WRKY54<br>Cytob5 domain<br>WRKY104<br>WRKY95              |

|                                  |                                  |                                                    |                                                                                                                                                                                                                                                                         |                                                                                        |
|----------------------------------|----------------------------------|----------------------------------------------------|-------------------------------------------------------------------------------------------------------------------------------------------------------------------------------------------------------------------------------------------------------------------------|----------------------------------------------------------------------------------------|
| LOC_Os05g47650<br>(Os05g0549800) | LOC_Os01g49830<br>LOC_Os01g04750 | Ethylene responsive element<br>binding protein 96  | Transcription, DNA-dependent;<br>regulation of transcription,<br>DNA-dependent                                                                                                                                                                                          | WRKY01<br>WRKY11<br>WRKY21<br>WRKY48<br>WRKY54<br>WRKY08<br>WRKY29<br>WRKY72           |
| LOC_Os01g52490<br>(Os01g0723200) | No Paralog                       | Ribosomal protein S24                              | Translation                                                                                                                                                                                                                                                             | WRKY22<br>WRKY21<br>WRKY48<br>WRKY54<br>Cytob <sub>5</sub> domain<br>WRKY104<br>WRKY95 |
| LOC_Os02g13530<br>(Os02g0229000) | LOC_Os06g36160                   | 40S ribosomal protein 19 -like                     | Translation                                                                                                                                                                                                                                                             | WRKY22<br>WRKY21<br>WRKY48<br>WRKY54<br>Cytob <sub>5</sub> domain<br>WRKY104<br>WRKY95 |
| LOC_Os07g39220<br>(Os07g0580500) | No Paralog                       | Brassinazole resistant 1 (OsBZR1)                  | Brassinosteroid mediated<br>signaling pathway; negative<br>regulation of transcription,<br>DNA-dependent; ovule<br>development; seed development                                                                                                                        | WRKY11<br>WRKY21<br>WRKY36<br>WRKY45<br>WRKY48<br>WRKY54<br>WRKY08                     |
| LOC_Os02g57650<br>(Os02g0822400) | LOC_Os08g44820                   | NAC 70 (OsNAC70)                                   | Regulation of transcription,<br>DNA-dependent                                                                                                                                                                                                                           | WRKY11<br>WRKY21<br>WRKY71<br>WRKY51<br>WRKY45<br>WRKY48<br>WRKY54<br>WRKY08           |
| LOC_Os04g39610<br>(Os04g0472300) | LOC_Os02g37590<br>LOC_Os08g39350 | phosphodiesterase family protein                   | Glycerol metabolic process;<br>lipid metabolic process; cell tip<br>growth; trichome<br>differentiation; root epidermal<br>cell differentiation; guard cell<br>morphogenesis; root hair cell<br>differentiation; plant-type cell<br>wall cellulose metabolic<br>process | WRKY22<br>WRKY21<br>WRKY45<br>WRKY48<br>WRKY54<br>WRKY104<br>WRKY95                    |
| LOC_Os09g34230<br>(Os09g0518000) | No Paralog                       | Indole-3-acetate- $\beta$ -<br>glucosyltransferase | Metabolic process                                                                                                                                                                                                                                                       | WRKY11<br>WRKY21<br>WRKY51<br>WRKY45<br>WRKY48<br>WRKY54<br>WRKY08                     |

|                                               |                                  |                                                      |                                                                                                                              |                                                                    |
|-----------------------------------------------|----------------------------------|------------------------------------------------------|------------------------------------------------------------------------------------------------------------------------------|--------------------------------------------------------------------|
| LOC_Os09g34270<br>(Os09g0518400)              | No Paralog                       | UDP-glucuronosyl and UDP-glucosyl transferase domain | na                                                                                                                           | WRKY11<br>WRKY21<br>WRKY51<br>WRKY45<br>WRKY48<br>WRKY54<br>WRKY08 |
| LOC_Os09g32040<br>(Os09g0493700)              | No Paralog                       | OsNAC42                                              | Regulation of transcription, DNA-dependent                                                                                   | WRKY11<br>WRKY21<br>WRKY51<br>WRKY45<br>WRKY48<br>WRKY54<br>WRKY08 |
| LOC_Os03g55540<br>(Os03g0764100)              | LOC_Os07g39960                   | OsWZF1                                               | na                                                                                                                           | WRKY01<br>WRKY21<br>WRKY71<br>WRKY51<br>WRKY53<br>WRKY28           |
| LOC_Os06g10780<br>(na)                        | No Paralog                       | AP2 domain containg TF1                              | na                                                                                                                           | WRKY21<br>WRKY121<br>WRKY48<br>WRKY54<br>WRKY73<br>WRKY94          |
| LOC_Os01g31370<br>(Os01g0498300)              | No Paralog                       | Glycosyltransferase AER61                            | na                                                                                                                           | WRKY11<br>WRKY24<br>WRKY71<br>WRKY51<br>WRKY53<br>WRKY08<br>WRKY23 |
| LOC_Os02g11070<br>(Os02g0205500)              | LOC_Os06g39750                   | Fatty acid elongase 1                                | Fatty acid biosynthetic process; metabolic process; lipid biosynthetic process; response to cold; response to light stimulus | WRKY01<br>WRKY108<br>WRKY71<br>WRKY53<br>WRKY07<br>WRKY28          |
| LOC_Os04g12980<br>(Os04g0206700)              | No Paralog                       | UDP-glucuronosyl/UDP-glucosyl transferase            | Metabolic process                                                                                                            | WRKY11<br>WRKY21<br>WRKY51<br>WRKY45<br>WRKY48<br>WRKY54<br>WRKY08 |
| LOC_Os01g11350<br>(Os01g0211800)              | LOC_Os01g55150<br>LOC_Os02g14910 | bZIP02                                               | Regulation of transcription, DNA-dependent; positive regulation of transcription, DNA-dependent; pollen development          | WRKY11<br>WRKY21<br>WRKY45<br>WRKY48<br>WRKY54<br>WRKY08           |
| LOC_Os01g09850<br>(Os01g0195000,Os01g0195066) | No Paralog                       | Indeterminate domain 2 (OsIDD2)                      | na                                                                                                                           | WRKY11<br>WRKY21<br>WRKY45<br>WRKY48<br>WRKY54<br>WRKY08           |

|                                  |                                                    |                                                        |                                                                                                                                                                                                             |                                                                              |
|----------------------------------|----------------------------------------------------|--------------------------------------------------------|-------------------------------------------------------------------------------------------------------------------------------------------------------------------------------------------------------------|------------------------------------------------------------------------------|
| LOC_Os01g62130<br>(Os01g0838600) | LOC_Os03g17150<br>LOC_Os05g38600<br>LOC_Os05g02390 | ZOS1-14 - C2H2 zinc finger protein                     | na                                                                                                                                                                                                          | WRKY11<br>WRKY21<br>WRKY71<br>WRKY51<br>WRKY48<br>WRKY54<br>WRKY08           |
| LOC_Os08g44820<br>(Os08g0562200) | LOC_Os02g57650                                     | OsNAC40                                                | Regulation of transcription, DNA-dependent                                                                                                                                                                  | WRKY11<br>WRKY21<br>WRKY71<br>WRKY51<br>WRKY45<br>WRKY48<br>WRKY54<br>WRKY08 |
| LOC_Os04g12970<br>(Os04g0206600) | No Paralog                                         | UDP-glucuronosyl/UDP-glucosyl transferase              | Metabolic process                                                                                                                                                                                           | WRKY11<br>WRKY21<br>WRKY51<br>WRKY45<br>WRKY48<br>WRKY54<br>WRKY08           |
| LOC_Os01g19130<br>(Os01g0295700) | LOC_Os05g04360                                     | protein phosphatase 2C                                 | Protein amino acid dephosphorylation                                                                                                                                                                        | WRKY12<br>WRKY11<br>WRKY71<br>WRKY53<br>WRKY08<br>WRKY28                     |
| LOC_Os01g57470<br>(Os01g0783700) | No Paralog                                         | EF hand family protein                                 | Response to auxin stimulus                                                                                                                                                                                  | WRKY11<br>WRKY24<br>WRKY71<br>WRKY53<br>WRKY08<br>WRKY28                     |
| LOC_Os02g38130<br>(Os02g0594800) | LOC_Os04g40140                                     | OsNAC50                                                | Regulation of transcription, DNA-dependent                                                                                                                                                                  | WRKY11<br>WRKY21<br>WRKY45<br>WRKY48<br>WRKY54<br>WRKY08                     |
| LOC_Os01g36630<br>(Os01g0546900) | No Paralog                                         | Jumonji 709                                            | Regulation of transcription, DNA-dependent; N-terminal protein myristoylation; histone H4-R3 demethylation; histone H3-R2 demethylation; histone H4-R3 methylation; positive regulation of seed germination | WRKY11<br>WRKY21<br>WRKY45<br>WRKY48<br>WRKY54<br>WRKY08                     |
| LOC_Os10g40740<br>(Os10g0556200) | No Paralog                                         | Helix-loop-helix DNA-binding domain containing protein | Regulation of transcription, DNA-dependent; double fertilization forming a zygote and endosperm                                                                                                             | WRKY11<br>WRKY21<br>WRKY45<br>WRKY48<br>WRKY54<br>WRKY08                     |
| LOC_Os01g72370<br>(Os01g0952800) | No Paralog                                         | Achaete-scute transcription factor related domain      | na                                                                                                                                                                                                          | WRKY11<br>WRKY16<br>WRKY21<br>WRKY45<br>WRKY48<br>WRKY54<br>WRKY08           |



|                                  |                                  |                                                       |                                                                                                                                    |                                                                    |
|----------------------------------|----------------------------------|-------------------------------------------------------|------------------------------------------------------------------------------------------------------------------------------------|--------------------------------------------------------------------|
| LOC_Os04g12960<br>(Os04g0206500) | No Paralog                       | UDP-glucuronosyl/UDP-glucosyl transferase             | Metabolic process                                                                                                                  | WRKY11<br>WRKY21<br>WRKY51<br>WRKY45<br>WRKY48<br>WRKY54<br>WRKY08 |
| LOC_Os02g03330<br>(Os02g0125700) | No Paralog                       | Lil3 protein                                          | na                                                                                                                                 | WRKY11<br>WRKY21<br>WRKY55<br>WRKY45<br>WRKY48<br>WRKY54<br>WRKY08 |
| LOC_Os03g64260<br>(Os03g0860100) | No Paralog                       | Ethylene-responsive transcription factor 83 (OsERF83) | Transcription, DNA-dependent; regulation of transcription, DNA-dependent; response to chitin                                       | WRKY11<br>WRKY21<br>WRKY45<br>WRKY48<br>WRKY54<br>WRKY08           |
| LOC_Os02g53410<br>(Os02g0774200) | LOC_Os09g27410                   | Conserved hypothetical protein                        | na                                                                                                                                 | WRKY11<br>WRKY15<br>WRKY24<br>WRKY71<br>WRKY53<br>WRKY08<br>WRKY28 |
| LOC_Os07g37400<br>(Os07g0561300) | No Paralog                       | Cyclin-like F-box (OsFBX257)                          | na                                                                                                                                 | WRKY01<br>WRKY11<br>WRKY21<br>WRKY71<br>WRKY48<br>WRKY54<br>WRKY08 |
| LOC_Os04g43680<br>(Os04g0517100) | LOC_Os02g41510<br>LOC_Os10g33810 | OsMYB 4                                               | Transcription, DNA-dependent; regulation of transcription, DNA-dependent; response to stress                                       | WRKY01<br>WRKY71<br>WRKY51<br>WRKY50<br>WRKY28                     |
| LOC_Os05g20930<br>(Os05g0286100) | No Paralog                       | Zinc finger protein KNUCKLES                          | Regulation of transcription, DNA-dependent; regulation of meristem structural organization; petal development; petal morphogenesis | WRKY11<br>WRKY21<br>WRKY45<br>WRKY48<br>WRKY54<br>WRKY08           |
| LOC_Os09g34860<br>(Os09g0520200) | No Paralog                       | Abhydrolase domain-containing protein 5               | Triglyceride homeostasis; phospholipid homeostasis; fatty acid homeostasis; lipid homeostasis                                      | WRKY01<br>WRKY11<br>WRKY71<br>WRKY51<br>WRKY50<br>WRKY08<br>WRKY28 |
| LOC_Os09g32510<br>(Os09g0501600) | LOC_Os01g68700<br>LOC_Os08g41320 | BHLH transcription factor, putative, expressed        | na                                                                                                                                 | WRKY11<br>WRKY21<br>WRKY45<br>WRKY48<br>WRKY54<br>WRKY08           |

|                                  |                                  |                                                           |                                                                                                                                                                                                                                                                                                                    |                                                                    |
|----------------------------------|----------------------------------|-----------------------------------------------------------|--------------------------------------------------------------------------------------------------------------------------------------------------------------------------------------------------------------------------------------------------------------------------------------------------------------------|--------------------------------------------------------------------|
| LOC_Os02g41510<br>(Os02g0624300) | LOC_Os10g33810<br>LOC_Os04g43680 | OsMYB 30                                                  | Response to salt stress; response to ethylene stimulus; response to auxin stimulus; response to gibberellin stimulus; response to salicylic acid stimulus; response to jasmonic acid stimulus; response to chitin; response to cadmium ion                                                                         | WRKY15<br>WRKY71<br>WRKY51<br>WRKY50<br>WRKY28                     |
| LOC_Os04g37710<br>(Os04g0450100) | No Paralog                       | Dihydroflolate reductase (DUF341 domain)                  | na                                                                                                                                                                                                                                                                                                                 | WRKY11<br>WRKY71<br>WRKY50<br>WRKY08<br>WRKY28                     |
| LOC_Os03g01740<br>(Os03g0107700) | No Paralog                       | EL2 protein                                               | Response to stress; cell cycle                                                                                                                                                                                                                                                                                     | WRKY01<br>WRKY21<br>WRKY71<br>WRKY50<br>WRKY07<br>WRKY28           |
| LOC_Os04g58850<br>(Os04g0685300) | LOC_Os01g64450<br>LOC_Os08g01210 | Harpin-induced 1 domain                                   | na                                                                                                                                                                                                                                                                                                                 | WRKY24<br>WRKY71<br>WRKY42<br>WRKY45<br>WRKY53<br>WRKY28           |
| LOC_Os04g48850<br>(Os04g0578000) | No Paralog                       | Ethylene biosynthesis ACC synthase 2                      | Induction of apoptosis by oxidative stress; biosynthetic process; response to external stimulus; response to wounding; response to mechanical stimulus; response to ethylene stimulus; response to auxin stimulus; response to jasmonic acid stimulus; cellular response to iron ion; response to oxidative stress | WRKY24<br>WRKY71<br>WRKY53<br>WRKY28                               |
| LOC_Os02g37590<br>(Os02g0588500) | LOC_Os04g39610                   | Glycerophosphoryldiester phosphodiesterase family protein | Glycerol metabolic process; lipid metabolic process; cell tip growth; trichome differentiation; root epidermal cell differentiation; guard cell morphogenesis; root hair cell differentiation; plant-type cell wall cellulose metabolic process                                                                    | WRKY22<br>WRKY21<br>WRKY48<br>WRKY54<br>WRKY104<br>WRKY95          |
| LOC_Os01g39110<br>(Os01g0572300) | No Paralog                       | Indeterminate domain 11                                   | na                                                                                                                                                                                                                                                                                                                 | WRKY01<br>WRKY11<br>WRKY21<br>WRKY45<br>WRKY48<br>WRKY54<br>WRKY08 |
| LOC_Os05g51130<br>(Os05g0588900) | LOC_Os01g42030                   | Mitochondrial chaperone BCS1                              | na                                                                                                                                                                                                                                                                                                                 | WRKY15<br>WRKY24<br>WRKY71<br>WRKY53<br>WRKY113<br>WRKY28          |

|                                                   |                                  |                                                     |                                                                                                          |                                                          |
|---------------------------------------------------|----------------------------------|-----------------------------------------------------|----------------------------------------------------------------------------------------------------------|----------------------------------------------------------|
| LOC_Os05g49420<br>(Os05g0569300)                  | LOC_Os01g46970                   | bZIP45                                              | Transcription, DNA-dependent;<br>regulation of transcription,<br>DNA-dependent                           | WRKY11<br>WRKY21<br>WRKY45<br>WRKY48<br>WRKY54<br>WRKY08 |
| LOC_Os02g07450<br>(Os02g0170500)                  | LOC_Os06g45640                   | HAP52 subunit of CCAAT box<br>binding complex       | Regulation of transcription,<br>DNA-dependent; positive<br>regulation of transcription,<br>DNA-dependent | WRKY11<br>WRKY21<br>WRKY48<br>WRKY54<br>WRKY08<br>WRKY94 |
| LOC_Os03g56580<br>(Os03g0777000)                  | LOC_Os07g04560                   | OsNAC66                                             | Regulation of transcription,<br>DNA-dependent                                                            | WRKY11<br>WRKY21<br>WRKY45<br>WRKY48<br>WRKY54<br>WRKY08 |
| LOC_Os02g11859<br>(Os02g0209300)                  | No Paralog                       | Hypothetical conserved gene                         | na                                                                                                       | WRKY01<br>WRKY71<br>WRKY42<br>WRKY53<br>WRKY07<br>WRKY28 |
| LOC_Os07g38240<br>(Os07g0569700)                  | No Paralog                       | Stress associated protein                           | Response to stress                                                                                       | WRKY11<br>WRKY21<br>WRKY45<br>WRKY48<br>WRKY54<br>WRKY08 |
| LOC_Os02g09980<br>(Os02g0193200)                  | No Paralog                       | TMV response-related protein                        | na                                                                                                       | WRKY01<br>WRKY71<br>WRKY51<br>WRKY45<br>WRKY53<br>WRKY28 |
| LOC_Os08g41320<br>(Os08g0524800)                  | LOC_Os01g68700<br>LOC_Os09g32510 | BHLH transcription factor                           | na                                                                                                       | WRKY11<br>WRKY21<br>WRKY45<br>WRKY48<br>WRKY54<br>WRKY08 |
| LOC_Os03g42370<br>(Os03g0621600,Os<br>03g0621650) | No Paralog                       | B3 DNA binding domain                               | na                                                                                                       | WRKY11<br>WRKY21<br>WRKY45<br>WRKY48<br>WRKY54<br>WRKY08 |
| LOC_Os02g42380<br>(Os02g0635800)                  | LOC_Os04g44440                   | TCP family transcription factor                     | na                                                                                                       | WRKY11<br>WRKY21<br>WRKY45<br>WRKY48<br>WRKY54<br>WRKY08 |
| LOC_Os09g25760<br>(Os09g0425900)                  | LOC_Os08g34460                   | Senescence-associated protein DH,<br>Tetraspanin 13 | na                                                                                                       | WRKY01<br>WRKY24<br>WRKY71<br>WRKY53<br>WRKY28           |

|                                  |                                                                                        |                                                             |                                                                                                                                                                                                                                                                                                                                                                                                                                                                                                                                                                                                                                                                                                                                   |                                                           |
|----------------------------------|----------------------------------------------------------------------------------------|-------------------------------------------------------------|-----------------------------------------------------------------------------------------------------------------------------------------------------------------------------------------------------------------------------------------------------------------------------------------------------------------------------------------------------------------------------------------------------------------------------------------------------------------------------------------------------------------------------------------------------------------------------------------------------------------------------------------------------------------------------------------------------------------------------------|-----------------------------------------------------------|
| LOC_Os06g45640<br>(Os06g0667100) | LOC_Os02g07450                                                                         | HAP5B                                                       | Regulation of transcription,<br>DNA-dependent                                                                                                                                                                                                                                                                                                                                                                                                                                                                                                                                                                                                                                                                                     | WRKY11<br>WRKY21<br>WRKY48<br>WRKY54<br>WRKY08<br>WRKY94  |
| LOC_Os03g50280<br>(Os03g0710700) | No Paralog                                                                             | GLTP domain containing protein                              | Respiratory burst during<br>defense response; protein<br>targeting to membrane; ER-<br>nuclear signaling pathway;<br>salicylic acid biosynthetic<br>process; response to ethylene<br>stimulus; abscisic acid<br>mediated signaling pathway;<br>salicylic acid mediated<br>signaling pathway; jasmonic<br>acid mediated signaling<br>pathway; response to chitin;<br>heat acclimation; regulation of<br>plant-type hypersensitive<br>response; endoplasmic<br>reticulum unfolded protein<br>response; negative regulation of<br>defense response; response to<br>endoplasmic reticulum stress;<br>innate immune response;<br>glycolipid transport; defense<br>response to fungus; callose<br>deposition during defense<br>response | WRKY01<br>WRKY24<br>WRKY71<br>WRKY51<br>WRKY48<br>WRKY54  |
| LOC_Os01g46970<br>(Os01g0658900) | LOC_Os05g49420                                                                         | bZIP8                                                       | Transcription, DNA-dependent;<br>regulation of transcription,<br>DNA-dependent                                                                                                                                                                                                                                                                                                                                                                                                                                                                                                                                                                                                                                                    | WRKY11<br>WRKY21<br>WRKY45<br>WRKY48<br>WRKY54<br>WRKY08  |
| LOC_Os08g39350<br>(Os08g0503200) | LOC_Os04g39610                                                                         | PLC-like phosphodiesterase, TIM<br>beta/alpha-barrel domain | Glycerol metabolic process;<br>lipid metabolic process; cell tip<br>growth; trichome<br>differentiation; root epidermal<br>cell differentiation; guard cell<br>morphogenesis; root hair cell<br>differentiation; plant-type cell<br>wall cellulose metabolic<br>process                                                                                                                                                                                                                                                                                                                                                                                                                                                           | WRKY22<br>WRKY21<br>WRKY48<br>WRKY54<br>WRKY104<br>WRKY95 |
| LOC_Os01g16240<br>(Os01g0267900) | No Paralog                                                                             | Calmodulin 1 (OsCam1)                                       | Pollen germination; regulation<br>of photomorphogenesis;<br>calcium-mediated signaling                                                                                                                                                                                                                                                                                                                                                                                                                                                                                                                                                                                                                                            | WRKY15<br>WRKY121<br>WRKY69<br>WRKY94                     |
| LOC_Os03g20370<br>(Os03g0319300) | LOC_Os01g59530<br>LOC_Os11g03980<br>LOC_Os12g03816<br>LOC_Os05g41200<br>LOC_Os07g48780 | Calmodulin1 (OsCam1)                                        | Pollen germination; regulation<br>of photomorphogenesis;<br>calcium-mediated signaling                                                                                                                                                                                                                                                                                                                                                                                                                                                                                                                                                                                                                                            | WRKY15<br>WRKY121<br>WRKY69<br>WRKY94                     |
| LOC_Os07g48780<br>(Os07g0687200) | LOC_Os03g20370<br>LOC_Os05g41200<br>LOC_Os11g03980<br>LOC_Os12g03816                   | Calmodulin B                                                | Pollen germination; regulation<br>of photomorphogenesis;<br>calcium-mediated signaling                                                                                                                                                                                                                                                                                                                                                                                                                                                                                                                                                                                                                                            | WRKY15<br>WRKY121<br>WRKY69<br>WRKY94                     |

|                                  |                                  |                                                           |                                                                                                                                                                                                                                                                      |                                                                    |
|----------------------------------|----------------------------------|-----------------------------------------------------------|----------------------------------------------------------------------------------------------------------------------------------------------------------------------------------------------------------------------------------------------------------------------|--------------------------------------------------------------------|
| LOC_Os03g15660<br>(Os03g0263000) | No Paralog                       | Ethylene response factor 9                                | Transcription, DNA-dependent; regulation of transcription, DNA-dependent                                                                                                                                                                                             | WRKY21<br>WRKY121<br>WRKY48<br>WRKY54<br>WRKY73<br>WRKY94          |
| LOC_Os01g49830<br>(Os01g0693400) | LOC_Os01g04750<br>LOC_Os05g47650 | Apetala2/ethylene-responsive element binding protein 127  | Transcription, DNA-dependent; regulation of transcription, DNA-dependent                                                                                                                                                                                             | WRKY11<br>WRKY21<br>WRKY53<br>WRKY48<br>WRKY54<br>WRKY08           |
| LOC_Os02g09990<br>(Os02g0193300) | No Paralog                       | Conserved hypothetical protein                            | na                                                                                                                                                                                                                                                                   | WRKY01<br>WRKY71<br>WRKY51<br>WRKY45<br>WRKY53<br>WRKY28           |
| LOC_Os11g13840<br>(Os11g0242300) | No Paralog                       | Ethylene response factor 19                               | Transcription, DNA-dependent; regulation of transcription, DNA-dependent                                                                                                                                                                                             | WRKY21<br>WRKY121<br>WRKY48<br>WRKY54<br>WRKY94                    |
| LOC_Os02g50460<br>(Os02g0738200) | LOC_Os06g13870                   | Plant U-box-containing protein 40                         | Protein ubiquitination                                                                                                                                                                                                                                               | WRKY01<br>WRKY77<br>WRKY24<br>WRKY71<br>WRKY47<br>WRKY69<br>WRKY72 |
| LOC_Os04g32620<br>(Os04g0398000) | No Paralog                       | Ethylene response factor 101                              | Transcription, DNA-dependent; regulation of transcription, DNA-dependent                                                                                                                                                                                             | WRKY21<br>WRKY121<br>WRKY48<br>WRKY54<br>WRKY94                    |
| LOC_Os07g04560<br>(Os07g0138200) | LOC_Os03g56580                   | NAC96                                                     | na                                                                                                                                                                                                                                                                   | WRKY11<br>WRKY21<br>WRKY45<br>WRKY48<br>WRKY54<br>WRKY08           |
| LOC_Os10g26460<br>(Os10g0404300) | No Paralog                       | Increased leaf inclination 7                              | Response to light stimulus; photomorphogenesis; response to brassinosteroid stimulus; brassinosteroid mediated signaling pathway; unidimensional cell growth; embryonic root morphogenesis; regulation of timing of transition from vegetative to reproductive phase | WRKY11<br>WRKY21<br>WRKY45<br>WRKY48<br>WRKY54<br>WRKY08           |
| LOC_Os04g44440<br>(Os04g0526000) | LOC_Os02g42380                   | Teosinte branched/cy cloidea/proliferating cell factor 17 | na                                                                                                                                                                                                                                                                   | WRKY11<br>WRKY21<br>WRKY45<br>WRKY48<br>WRKY54<br>WRKY08           |

|                                  |                |                                                     |                                                                                                                                                                       |                                                          |
|----------------------------------|----------------|-----------------------------------------------------|-----------------------------------------------------------------------------------------------------------------------------------------------------------------------|----------------------------------------------------------|
| LOC_Os01g44390<br>(Os01g0635200) | No Paralog     | Homeodomain-like containing protein                 | na                                                                                                                                                                    | WRKY21<br>WRKY121<br>WRKY48<br>WRKY54<br>WRKY94          |
| LOC_Os03g11910<br>(Os03g0218500) | No Paralog     | 70 kD heat shock protein                            | Protein folding; heat acclimation; response to hydrogen peroxide; response to heat; response to high light intensity                                                  | WRKY11<br>WRKY21<br>WRKY48<br>WRKY54<br>WRKY08           |
| LOC_Os03g37090<br>(Os03g0568500) | No Paralog     | Uncharacterised protein family UPF0136              | na                                                                                                                                                                    | WRKY01<br>WRKY24<br>WRKY71<br>WRKY53<br>WRKY28<br>WRKY94 |
| LOC_Os05g04210<br>(Os05g0132700) | LOC_Os01g19330 | R2R3 Myb-like protein.                              | na                                                                                                                                                                    | WRKY11<br>WRKY121<br>WRKY08<br>WRKY94                    |
| LOC_Os09g20220<br>(Os09g0367700) | No Paralog     | glutathione S-transferase (GST6)                    | Glutathione metabolic process; response to oxidative stress; response to cold; response to herbicide; cellular response to water deprivation; response to cadmium ion | WRKY11<br>WRKY21<br>WRKY48<br>WRKY54<br>WRKY08           |
| LOC_Os03g42230<br>(Os03g0619600) | LOC_Os12g40070 | Transcriptional factor B3 family protein            | Transcription, DNA-dependent; regulation of transcription, DNA-dependent                                                                                              | WRKY11<br>WRKY21<br>WRKY45<br>WRKY48<br>WRKY54<br>WRKY08 |
| LOC_Os03g57200<br>(Os03g0785900) | LOC_Os03g44170 | TAU glutathione s-transferase 1                     | Glutathione metabolic process; response to oxidative stress; response to cold; response to herbicide; cellular response to water deprivation; response to cadmium ion | WRKY11<br>WRKY21<br>WRKY48<br>WRKY54<br>WRKY08<br>WRKY95 |
| LOC_Os03g42240<br>(Os03g0619800) | No Paralog     | Transcriptional factor B3 domain                    | Transcription, DNA-dependent; regulation of transcription, DNA-dependent                                                                                              | WRKY11<br>WRKY21<br>WRKY45<br>WRKY48<br>WRKY54<br>WRKY08 |
| LOC_Os01g72530<br>(Os01g0955100) | No Paralog     | OsCML31 - Calmodulin-related calcium sensor protein | na                                                                                                                                                                    | WRKY21<br>WRKY71<br>WRKY42<br>WRKY53<br>WRKY28           |
| LOC_Os03g50210<br>(Os03g0710000) | LOC_Os03g15210 | DUF292 domain                                       | na                                                                                                                                                                    | WRKY11<br>WRKY21<br>WRKY48<br>WRKY54<br>WRKY08           |
| LOC_Os07g42740<br>(Os07g0619500) | No Paralog     | DUF1645 domain                                      | na                                                                                                                                                                    | WRKY01<br>WRKY71<br>WRKY53<br>WRKY28<br>WRKY74<br>WRKY72 |

|                                  |                                  |                                                                            |                                                                                                                                        |                                                 |
|----------------------------------|----------------------------------|----------------------------------------------------------------------------|----------------------------------------------------------------------------------------------------------------------------------------|-------------------------------------------------|
| LOC_Os01g63690<br>(Os01g0855600) | No Paralog                       | Hs1pro-1 protein                                                           | Response to oxidative stress;<br>response to salicylic acid<br>stimulus; defense response to<br>bacterium, incompatible<br>interaction | WRKY11<br>WRKY71<br>WRKY53<br>WRKY08<br>WRKY28  |
| LOC_Os05g01940<br>(Os05g0110000) | LOC_Os01g74040<br>LOC_Os03g16480 | Zinc finger, RING/FYVE/PHD-<br>type domain                                 | na                                                                                                                                     | WRKY21<br>WRKY71<br>WRKY53<br>WRKY28<br>WRKY74  |
| LOC_Os03g08330<br>(Os03g0181100) | No Paralog                       | Jasmonate zim-domain protein                                               | na                                                                                                                                     | WRKY01<br>WRKY108<br>WRKY71<br>WRKY53<br>WRKY28 |
| LOC_Os03g38870<br>(Os03g0585600) | No Paralog                       | DOF zinc finger domain                                                     | Regulation of transcription,<br>DNA-dependent                                                                                          | WRKY16<br>WRKY121<br>WRKY51<br>WRKY94           |
| LOC_Os02g33600<br>(Os02g0539500) | LOC_Os04g34050                   | VQ motif-containing protein 8                                              | na                                                                                                                                     | WRKY24<br>WRKY71<br>WRKY53                      |
| LOC_Os01g38980<br>(Os01g0570800) | No Paralog                       | IQ calmodulin-binding region<br>domain                                     | na                                                                                                                                     | WRKY01<br>WRKY21<br>WRKY71<br>WRKY53            |
| LOC_Os02g07690<br>(Os02g0173200) | No Paralog                       | VQ motif-containing protein 5                                              | na                                                                                                                                     | WRKY01<br>WRKY71<br>WRKY53<br>WRKY07<br>WRKY28  |
| LOC_Os02g35240<br>(Os02g0558700) | No Paralog                       | Dehydration-responsive element-<br>binding protein, putative,<br>expressed | Transcription, DNA-dependent;<br>regulation of transcription,<br>DNA-dependent                                                         | WRKY21<br>WRKY121<br>WRKY48<br>WRKY54<br>WRKY94 |
| LOC_Os02g49560<br>(Os02g0728001) | LOC_Os09g29820                   | bZIP22                                                                     | Regulation of transcription,<br>DNA-dependent                                                                                          | WRKY13<br>WRKY21<br>WRKY34<br>WRKY48<br>WRKY54  |
| LOC_Os06g13870<br>(Os06g0248500) | LOC_Os02g50460                   | U-box protein CMPG1                                                        | Protein ubiquitination                                                                                                                 | WRKY24<br>WRKY71<br>WRKY53<br>WRKY28            |

**Supplementary Table 11.** List of networking WRKY genes forming context associated hubs (number of enriched terms by p-values  $\leq 0.01$  is 100.)

| RGAP locus ID<br>(RAP-DB ID) | Paralog        | Gene descriptions                                         | Gramene annotated GO biological process<br>term of rice                                                                                                                                                                                                                                | p-value  |
|------------------------------|----------------|-----------------------------------------------------------|----------------------------------------------------------------------------------------------------------------------------------------------------------------------------------------------------------------------------------------------------------------------------------------|----------|
| LOC_Os01g60640               | LOC_Os05g40060 | WRKY 21                                                   | Regulation of transcription, DNA-dependent                                                                                                                                                                                                                                             | 7.94e-15 |
| LOC_Os05g40060               | LOC_Os07g48260 | WRKY47                                                    | Regulation of transcription, DNA-dependent                                                                                                                                                                                                                                             | 3.49e-13 |
| LOC_Os03g47280               |                | VQ motif<br>containing protein<br>13                      | VQ domain containing protein, putative,<br>expressed                                                                                                                                                                                                                                   | 9.24e-13 |
| LOC_Os05g40080               |                | WRKY45                                                    | regulation of transcription, DNA-dependent                                                                                                                                                                                                                                             | 9.64e-13 |
| LOC_Os05g25770               |                | WRKY 48                                                   | regulation of transcription, DNA-dependent                                                                                                                                                                                                                                             | 1.66e-12 |
| LOC_Os06g44010               |                | WRKY 54                                                   | regulation of transcription, DNA-dependent                                                                                                                                                                                                                                             | 2.24e-11 |
| LOC_Os02g08440               | LOC_Os06g44010 | WRKY71                                                    | <i>Os</i> WRKY71 - Superfamily of TFs having<br>WRKY and zinc finger domains, expressed                                                                                                                                                                                                | 1.37e-09 |
| LOC_Os02g50460               | LOC_Os06g13870 | Ubox 40                                                   | protein ubiquitination                                                                                                                                                                                                                                                                 | 1.39e-09 |
| LOC_Os02g43150               | LOC_Os04g45650 | AG-motif binding<br>protein-3                             | regulation of transcription, DNA-dependent;<br>positive regulation of transcription, DNA-<br>dependent                                                                                                                                                                                 | 2.10e-09 |
| LOC_Os02g21040               |                | Peptidase A1<br>domain                                    | proteolysis                                                                                                                                                                                                                                                                            | 7.63e-09 |
| LOC_Os03g42240               |                | Transcriptional<br>factor B3 domain<br>containing protein | transcription, DNA-dependent; regulation of<br>transcription, DNA-dependent                                                                                                                                                                                                            | 7.63e-09 |
| LOC_Os03g42230               | LOC_Os12g40070 | Transcriptional<br>factor B3 family<br>protein            | transcription, DNA-dependent; regulation of<br>transcription, DNA-dependent                                                                                                                                                                                                            | 1.12e-08 |
| LOC_Os08g34790               |                | 4-coumarate--CoA<br>ligase 1                              | metabolic process; phenylpropanoid<br>metabolic process                                                                                                                                                                                                                                | 1.15e-08 |
| LOC_Os10g26460               |                | Increased leaf<br>inclination 7                           | response to light stimulus;<br>photomorphogenesis; response to<br>brassinosteroid stimulus; brassinosteroid<br>mediated signaling pathway; unidimensional<br>cell growth; embryonic root morphogenesis;<br>regulation of timing of transition from<br>vegetative to reproductive phase | 1.34e-08 |
| LOC_Os02g53410               | LOC_Os09g27410 | Conserved<br>hypothetical protein                         | expressed protein                                                                                                                                                                                                                                                                      | 1.92e-08 |
| LOC_Os01g49830               | LOC_Os05g47650 | Ethylene<br>responsive<br>factor127                       | transcription, DNA-dependent; regulation of<br>transcription, DNA-dependent                                                                                                                                                                                                            | 2.44e-08 |
| LOC_Os08g44820               |                | NAC40                                                     | regulation of transcription, DNA-dependent                                                                                                                                                                                                                                             | 2.47e-08 |
| LOC_Os04g44440               |                | Teosinte 17                                               | TCP family transcription factor, putative,<br>expressed                                                                                                                                                                                                                                | 2.86e-08 |
| LOC_Os05g47650               |                | Ethylene responsive<br>factor96                           | transcription, DNA-dependent; regulation of<br>transcription, DNA-dependent                                                                                                                                                                                                            | 3.48e-08 |
| LOC_Os09g32040               |                | NAC42                                                     | regulation of transcription, DNA-dependent                                                                                                                                                                                                                                             | 3.99e-08 |
| LOC_Os07g37400               |                | F-box domain396<br>(OsFBX396)                             | OsFBX257 - F-box domain containing<br>protein, expressed                                                                                                                                                                                                                               | 5.60e-08 |
| LOC_Os01g72370               |                | Helix loop helix<br>domain                                | helix-loop-helix DNA-binding domain<br>containing protein, expressed                                                                                                                                                                                                                   | 5.87e-08 |



|                |                |                                                          |                                                                                                                                                                                                                                                                                                                                                                                                                                                                                                                                      |          |
|----------------|----------------|----------------------------------------------------------|--------------------------------------------------------------------------------------------------------------------------------------------------------------------------------------------------------------------------------------------------------------------------------------------------------------------------------------------------------------------------------------------------------------------------------------------------------------------------------------------------------------------------------------|----------|
| LOC_Os03g08330 |                | Tify gene 11B                                            | ZIM domain containing protein, putative, expressed                                                                                                                                                                                                                                                                                                                                                                                                                                                                                   | 1.49e-07 |
| LOC_Os07g39220 |                | Brassinazole resistant 1                                 | Brassinosteroid mediated signaling pathway; negative regulation of transcription, DNA-dependent; ovule development; seed development                                                                                                                                                                                                                                                                                                                                                                                                 | 1.52e-07 |
| LOC_Os02g37590 | LOC_Os04g39610 | Hypothetical protein                                     | glycerol metabolic process; lipid metabolic process; cell tip growth; trichome differentiation; root epidermal cell differentiation; guard cell morphogenesis; root hair cell differentiation; plant-type cell wall cellulose metabolic process                                                                                                                                                                                                                                                                                      | 1.55e-07 |
| LOC_Os10g40740 |                | helix-loop-helix protein 113                             | regulation of transcription, DNA-dependent; double fertilization forming a zygote and endosperm                                                                                                                                                                                                                                                                                                                                                                                                                                      | 1.55e-07 |
| LOC_Os07g38240 |                | Stress associated protein gene 16                        | response to stress                                                                                                                                                                                                                                                                                                                                                                                                                                                                                                                   | 1.84e-07 |
| LOC_Os01g36630 |                | Jumonji 709                                              | regulation of transcription, DNA-dependent; N-terminal protein myristoylation; biological process; histone H4-R3 demethylation; histone H3-R2 demethylation; histone H4-R3 methylation; positive regulation of seed germination                                                                                                                                                                                                                                                                                                      | 1.84e-07 |
| LOC_Os02g11859 |                | Hypothetical conserved gene                              | expressed protein                                                                                                                                                                                                                                                                                                                                                                                                                                                                                                                    | 2.43e-07 |
| LOC_Os04g39610 | LOC_Os08g39350 | PLC-like phosphodiesterase, TIM beta/alpha-barrel domain | glycerol metabolic process; lipid metabolic process; cell tip growth; trichome differentiation; root epidermal cell differentiation; guard cell morphogenesis; root hair cell differentiation; plant-type cell wall cellulose metabolic process                                                                                                                                                                                                                                                                                      | 4.31e-07 |
| LOC_Os05g50610 |                | WRKY8                                                    | regulation of transcription, DNA-dependent                                                                                                                                                                                                                                                                                                                                                                                                                                                                                           | 4.49e-07 |
| LOC_Os03g01740 |                | EL2 protein                                              | response to stress; cell cycle                                                                                                                                                                                                                                                                                                                                                                                                                                                                                                       | 4.71e-07 |
| LOC_Os02g57650 | LOC_Os08g44820 | NAC70                                                    | regulation of transcription, DNA-dependent                                                                                                                                                                                                                                                                                                                                                                                                                                                                                           | 5.11e-07 |
| LOC_Os10g41230 |                | Homeodomain leucine zipper protein (HOX1)                | transcription, DNA-dependent; regulation of transcription, DNA-dependent; shade avoidance; response to hormone stimulus; response to far red light; shoot morphogenesis; response to cytokinin stimulus; unidimensional cell growth; negative regulation of transcription, DNA-dependent; response to auxin stimulus; root development; cell proliferation; fruit septum development; reproductive developmental process; floral meristem determinacy; gynoecium development; meristem development; auxin mediated signaling pathway | 5.20e-07 |
| LOC_Os02g07690 |                | VQ domain containing protein5                            | VQ domain containing protein, putative, expressed                                                                                                                                                                                                                                                                                                                                                                                                                                                                                    | 5.38e-07 |
| LOC_Os04g58850 | LOC_Os08g01210 | Harpin-induced 1 domain containing protein               | harpin-induced protein 1 domain containing protein, expressed                                                                                                                                                                                                                                                                                                                                                                                                                                                                        | 6.23e-07 |

|                |                |                                                                        |                                                                                                                                                                                                                                                                                                                                                                           |          |
|----------------|----------------|------------------------------------------------------------------------|---------------------------------------------------------------------------------------------------------------------------------------------------------------------------------------------------------------------------------------------------------------------------------------------------------------------------------------------------------------------------|----------|
| LOC_Os06g46950 |                | Small calcium binding protein with one hand motif                      | EF hand family protein, putative, expressed                                                                                                                                                                                                                                                                                                                               | 6.39e-07 |
| LOC_Os01g62130 | LOC_Os05g02390 | ZOS1-14 - C2H2 zinc finger protein                                     | ZOS1-14 - C2H2 zinc finger protein, expressed                                                                                                                                                                                                                                                                                                                             | 6.62e-07 |
| LOC_Os05g27730 | LOC_Os05g39720 | WRKY53                                                                 | regulation of transcription, DNA-dependent; camalexin biosynthetic process; cellular heat acclimation; cellular response to heat; response to cold; response to heat; positive regulation of autophagy; defense response to bacterium; response to chitin; response to salt stress; defense response to fungus; response to water deprivation; response to osmotic stress | 7.05e-07 |
| LOC_Os01g43650 | LOC_Os05g50610 | WRKY 11                                                                | regulation of transcription, DNA-dependent                                                                                                                                                                                                                                                                                                                                | 7.45e-07 |
| LOC_Os07g04560 |                | NAC96                                                                  | no apical meristem protein, putative                                                                                                                                                                                                                                                                                                                                      | 8.50e-07 |
| LOC_Os03g37090 |                | Uncharacterised protein family UPF0136                                 | expressed protein                                                                                                                                                                                                                                                                                                                                                         | 9.25e-07 |
| LOC_Os03g64260 |                | Ethylene response factor 83                                            | transcription, DNA-dependent; regulation of transcription, DNA-dependent; response to chitin                                                                                                                                                                                                                                                                              | 1.05e-06 |
| LOC_Os02g42380 | LOC_Os04g44440 | Transcription factor, TCP domain                                       | TCP family transcription factor, putative, expressed                                                                                                                                                                                                                                                                                                                      | 1.19e-06 |
| LOC_Os03g42370 |                | Transcriptional factor B3 domain                                       | B3 DNA binding domain containing protein                                                                                                                                                                                                                                                                                                                                  | 1.34e-06 |
| LOC_Os01g61080 | LOC_Os05g39720 | WRKY 24                                                                | regulation of transcription, DNA-dependent                                                                                                                                                                                                                                                                                                                                | 1.48e-06 |
| LOC_Os05g20930 |                | Zinc-finger protein KNUCKLES.                                          | regulation of transcription, DNA-dependent; regulation of meristem structural organization; petal development; petal morphogenesis                                                                                                                                                                                                                                        | 1.51e-06 |
| LOC_Os01g46970 | LOC_Os05g49420 | bZIP8                                                                  | transcription, DNA-dependent; regulation of transcription, DNA-dependent                                                                                                                                                                                                                                                                                                  | 1.69e-06 |
| LOC_Os02g11070 | LOC_Os06g39750 | Fatty acid elongase 1                                                  | fatty acid biosynthetic process; metabolic process; lipid biosynthetic process; response to cold; response to light stimulus                                                                                                                                                                                                                                              | 2.35e-06 |
| LOC_Os01g31370 |                | Glycosyltransferase AER61                                              | glycosyltransferase, putative, expressed                                                                                                                                                                                                                                                                                                                                  | 2.60e-06 |
| LOC_Os03g56580 | LOC_Os07g04560 | NAC66                                                                  | regulation of transcription, DNA-dependent                                                                                                                                                                                                                                                                                                                                | 2.62e-06 |
| LOC_Os04g48350 | LOC_Os09g35010 | Dehydration responsive element binding protein (DRE) binding factor 1E | Transcription, DNA-dependent; regulation of transcription, DNA-dependent; response to stress; response to cold; response to water deprivation ;cold acclimation                                                                                                                                                                                                           | 3.58e-06 |
| LOC_Os05g51130 |                | Mitochondrial chaperone BCS1                                           | mitochondrial chaperone BCS1, putative, expressed                                                                                                                                                                                                                                                                                                                         | 3.80e-06 |
| LOC_Os05g49420 |                | bZIP45                                                                 | transcription, DNA-dependent; regulation of transcription, DNA-dependent                                                                                                                                                                                                                                                                                                  | 4.06e-06 |
| LOC_Os06g45640 |                | HAP5B subunit of CCAAT box binding complex                             | regulation of transcription, DNA-dependent                                                                                                                                                                                                                                                                                                                                | 4.76e-06 |

|                |                |                                            |                                                                                                                                                                                                                      |          |
|----------------|----------------|--------------------------------------------|----------------------------------------------------------------------------------------------------------------------------------------------------------------------------------------------------------------------|----------|
| LOC_Os01g19130 | LOC_Os05g04360 | Protein phosphatase-2C02                   | protein amino acid dephosphorylation                                                                                                                                                                                 | 5.38e-06 |
| LOC_Os03g57200 |                | TAU Glutathione-S-transferase 1            | glutathione metabolic process; response to oxidative stress; response to cold; response to herbicide; cellular response to water deprivation; response to cadmium ion                                                | 6.64e-06 |
| LOC_Os02g45450 | LOC_Os04g48350 | Ethylene responsive factor 25              | transcription, DNA-dependent; regulation of transcription, DNA-dependent; response to cold; response to water deprivation; cold acclimation; response to stress; positive regulation of transcription, DNA-dependent | 7.19e-06 |
| LOC_Os08g41320 | LOC_Os09g32510 | TA1 protein                                | BHLH transcription factor, putative, expressed                                                                                                                                                                       | 7.47e-06 |
| LOC_Os03g21640 | LOC_Os07g48280 | Protein of unknown function DUF3133 domain | expressed protein                                                                                                                                                                                                    | 7.51e-06 |
| LOC_Os01g11350 | LOC_Os02g14910 | bZIP02                                     | regulation of transcription, DNA-dependent; positive regulation of transcription, DNA-dependent; pollen development                                                                                                  | 7.68e-06 |
| LOC_Os02g03330 |                | Lil3 protein                               | expressed protein                                                                                                                                                                                                    | 7.95e-06 |
| LOC_Os06g13190 |                | Conserved hypothetical protein             | expressed protein                                                                                                                                                                                                    | 8.72e-06 |
| LOC_Os08g37660 | LOC_Os09g29390 | Uclacyanin like protein 29                 | plastocyanin-like domain containing protein, putative, expressed                                                                                                                                                     | 8.72e-06 |
| LOC_Os02g07450 | LOC_Os06g45640 | Indeterminate domain 11                    | regulation of transcription, DNA-dependent; positive regulation of transcription, DNA-dependent                                                                                                                      | 8.85e-06 |
| LOC_Os01g39110 |                | Indeterminate domain 11                    | ZOS1-10 - C2H2 zinc finger protein, expressed                                                                                                                                                                        | 9.02e-06 |
| LOC_Os06g10530 |                | Conserved hypothetical protein             | expressed protein                                                                                                                                                                                                    | 9.37e-06 |
| LOC_Os01g39330 | LOC_Os06g37410 | Helix-loop-helix protein 24                | helix-loop-helix DNA-binding domain containing protein, expressed                                                                                                                                                    | 9.37e-06 |
| LOC_Os06g33970 |                | VQ motif containing protein 22             | VQ domain containing protein, putative, expressed                                                                                                                                                                    | 9.37e-06 |
| LOC_Os04g46240 |                | Ethylene responsive factor 97              | AP2 domain containing protein, expressed                                                                                                                                                                             | 1.01e-05 |
| LOC_Os07g42740 |                | Protein of unknown function DUF1645        | DUF1645 domain containing protein, putative, expressed                                                                                                                                                               | 1.10e-05 |
| LOC_Os02g43820 |                | Ethylene responsive factor 95              | AP2 domain containing protein, expressed                                                                                                                                                                             | 1.24e-05 |
| LOC_Os02g44880 | LOC_Os04g47450 | H0211B05.7 protein                         | Expressed protein                                                                                                                                                                                                    | 1.41e-05 |
| LOC_Os01g50420 |                | Serine/threonine protein kinase domain     | protein amino acid phosphorylation                                                                                                                                                                                   | 1.41e-05 |
| LOC_Os08g31000 |                | Ankyrin repeat protein                     | expressed protein                                                                                                                                                                                                    | 1.50e-05 |
| LOC_Os06g10780 |                | AP2 domain containing protein              | AP2 domain containing protein, expressed                                                                                                                                                                             | 1.66e-05 |
| LOC_Os04g58810 |                | CCR4 associated factor 1B                  | nuclear-transcribed mRNA poly(A) tail shortening; defense response to insect ;defense response to bacterium; response to wounding                                                                                    | 1.70e-05 |

|                |                |                                               |                                                                                                                                                                                                                                                                                                                                                                                                                                                                                                                                                                                                                                                             |          |
|----------------|----------------|-----------------------------------------------|-------------------------------------------------------------------------------------------------------------------------------------------------------------------------------------------------------------------------------------------------------------------------------------------------------------------------------------------------------------------------------------------------------------------------------------------------------------------------------------------------------------------------------------------------------------------------------------------------------------------------------------------------------------|----------|
| LOC_Os03g50280 |                | GLTP domain                                   | Respiratory burst during defense response; protein targeting to membrane; ER-nuclear signaling pathway; salicylic acid biosynthetic process; response to ethylene stimulus; abscisic acid mediated signaling pathway; salicylic acid mediated signaling pathway; jasmonic acid mediated signaling pathway; response to chitin; heat acclimation; regulation of plant-type hypersensitive response; endoplasmic reticulum unfolded protein response; negative regulation of defense response; response to endoplasmic reticulum stress; innate immune response; glycolipid transport; defense response to fungus; callose deposition during defense response | 2.17e-05 |
| LOC_Os02g32140 |                | Ethylene responsive factor 107                | AP2 domain containing protein, expressed                                                                                                                                                                                                                                                                                                                                                                                                                                                                                                                                                                                                                    | 2.25e-05 |
| LOC_Os01g62430 |                | Elicitor-responsive protein 1                 | C2 domain containing protein, putative, expressed                                                                                                                                                                                                                                                                                                                                                                                                                                                                                                                                                                                                           | 2.41e-05 |
| LOC_Os09g25760 |                | tetraspanin protein 13                        | tetraspanin family protein, putative, expressed                                                                                                                                                                                                                                                                                                                                                                                                                                                                                                                                                                                                             | 2.41e-05 |
| LOC_Os02g49560 | LOC_Os09g29820 | bZIP22                                        | regulation of transcription, DNA-dependent                                                                                                                                                                                                                                                                                                                                                                                                                                                                                                                                                                                                                  | 2.49e-05 |
| LOC_Os03g15660 |                | Ethylene responsive factor 9                  | transcription, DNA-dependent; regulation of transcription, DNA-dependent                                                                                                                                                                                                                                                                                                                                                                                                                                                                                                                                                                                    | 2.79e-05 |
| LOC_Os01g42030 | LOC_Os05g51130 | BCS1 protein-like protein                     | mitochondrial chaperone BCS1, putative, expressed                                                                                                                                                                                                                                                                                                                                                                                                                                                                                                                                                                                                           | 2.83e-05 |
| LOC_Os07g48630 |                | Ethylene insensitive like gene 2              | regulation of transcription, DNA-dependent; response to ethylene stimulus; defense response to bacterium                                                                                                                                                                                                                                                                                                                                                                                                                                                                                                                                                    | 2.84e-05 |
| LOC_Os09g34270 |                | UDP-glucosyl transferase UGT74H5              | UDP-glucuronosyl and UDP-glucosyl transferase domain containing protein                                                                                                                                                                                                                                                                                                                                                                                                                                                                                                                                                                                     | 2.99e-05 |
| LOC_Os02g09990 |                | Conserved hypothetical protein                | expressed protein                                                                                                                                                                                                                                                                                                                                                                                                                                                                                                                                                                                                                                           | 3.19e-05 |
| LOC_Os01g09850 |                | Zinc finger, C2H2-type domain                 | ZOS1-04 - C2H2 zinc finger protein, expressed                                                                                                                                                                                                                                                                                                                                                                                                                                                                                                                                                                                                               | 3.33e-05 |
| LOC_Os05g38620 |                | Zinc finger, C2H2 domain containing protein.  | ZOS5-10 - C2H2 zinc finger protein                                                                                                                                                                                                                                                                                                                                                                                                                                                                                                                                                                                                                          | 3.42e-05 |
| LOC_Os09g34860 |                | Abhydrolase domain-containing protein 5.      | triglyceride homeostasis; phospholipid homeostasis; fatty acid homeostasis; lipid homeostasis                                                                                                                                                                                                                                                                                                                                                                                                                                                                                                                                                               | 3.65e-05 |
| LOC_Os03g55540 | LOC_Os07g39960 | Zinc finger transcription factor ZF1          | ZOS3-18 - C2H2 zinc finger protein, expressed                                                                                                                                                                                                                                                                                                                                                                                                                                                                                                                                                                                                               | 3.78e-05 |
| LOC_Os01g57470 |                | EF-hand Ca <sup>2+</sup> binding protein CCD1 | response to auxin stimulus                                                                                                                                                                                                                                                                                                                                                                                                                                                                                                                                                                                                                                  | 3.78e-05 |
| LOC_Os02g09980 |                | TMV response-related protein                  | Expressed protein                                                                                                                                                                                                                                                                                                                                                                                                                                                                                                                                                                                                                                           | 3.86e-05 |

|                |                |                                    |                                                                                                                                                                                                                                                                                                                                                                                                                                                                                                                                                                                                                                                                                                                                                                                  |          |
|----------------|----------------|------------------------------------|----------------------------------------------------------------------------------------------------------------------------------------------------------------------------------------------------------------------------------------------------------------------------------------------------------------------------------------------------------------------------------------------------------------------------------------------------------------------------------------------------------------------------------------------------------------------------------------------------------------------------------------------------------------------------------------------------------------------------------------------------------------------------------|----------|
| LOC_Os06g41770 |                | bZIP50                             | MAPKKK cascade; respiratory burst during defense response; regulation of transcription, DNA-dependent; protein targeting to membrane; ER-nuclear signaling pathway; cell communication; response to cold; response to xenobiotic stimulus; ethylene biosynthetic process; abscisic acid mediated signaling pathway; systemic acquired resistance, salicylic acid mediated signaling pathway; jasmonic acid mediated signaling pathway; ethylene mediated signaling pathway; heat acclimation; regulation of plant-type hypersensitive response; negative regulation of defense response; response to endoplasmic reticulum stress; negative regulation of programmed cell death; defense response to fungus; response to chitin; endoplasmic reticulum unfolded protein response | 3.87e-05 |
| LOC_Os06g13870 |                | U-box protein 39                   | Protein ubiquitination                                                                                                                                                                                                                                                                                                                                                                                                                                                                                                                                                                                                                                                                                                                                                           | 3.87e-05 |
| LOC_Os02g35240 |                | Ethylene response factor 21        | Transcription, DNA-dependent; regulation of transcription                                                                                                                                                                                                                                                                                                                                                                                                                                                                                                                                                                                                                                                                                                                        | 4.34e-05 |
| LOC_Os11g13840 |                | Ethylene responsive factor 19      | Transcription, DNA-dependent; response to stress                                                                                                                                                                                                                                                                                                                                                                                                                                                                                                                                                                                                                                                                                                                                 | 4.47e-05 |
| LOC_Os04g43680 | LOC_Os10g33810 | OsMyb4                             | Transcription, DNA-dependent; response to stress                                                                                                                                                                                                                                                                                                                                                                                                                                                                                                                                                                                                                                                                                                                                 | 5.01e-05 |
| LOC_Os09g29360 |                | Basic helix-loop-helix protein 046 | Helix-loop-helix DNA-binding protein, putative, expressed                                                                                                                                                                                                                                                                                                                                                                                                                                                                                                                                                                                                                                                                                                                        | 5.14e-05 |
| LOC_Os10g23050 |                | Basic helix-loop-helix protein 045 | Helix-loop-helix DNA-binding protein, putative, expressed                                                                                                                                                                                                                                                                                                                                                                                                                                                                                                                                                                                                                                                                                                                        | 5.37e-05 |
